# Supplementary material
Source: publisher site journal article supplement (https://www.dovepress.com/article/558606)
Supplement: Supplementary file 1 [file 558606%20Revised%20Supplementary%20Materials.docx]

**Supplementary Materials**

**Contents**

[**Table S1** Lipid Compositions of plasma membranes of mammals (PMm) 1](#_Toc216888365)

[**Table S2** Lipid Compositions of Gram-negative (G-) bacteria outer membrane 2](#_Toc216888366)

[**Table S3** Lipid Compositions of Gram-negative (G+) bacteria cell membrane 3](#_Toc216888367)

[**Table S4** Clog *P* Values of Compounds **5a-t** 5](#_Toc216888368)

[**Table S5** The MIC values of selected antibiotics against *S. aureus* ATCC 29213 and *E. coli* ATCC 25922 in the presence or absence of 32 μg/mL PG 6](#_Toc216888369)

[**Spectral Data for Compounds 5a-t** 7](#_Toc216888370)

[**NMR and HRMS Spectra of Compounds 5a-t** 20](#_Toc216888371)

[**References** 49](#_Toc216888372)

**Table S1 Lipid Compositions of** **plasma membranes of mammals (PMm) 1,2**

| Lipid Name | Lipid Head/Tail | #Lipids in Leaflets | | Charge(*e*) | |
| --- | --- | --- | --- | --- | --- |
| Outer | Inner |
| POPCa | PCb (16:0/18:1(9Z)) | 16 | 7 | 0 | |
| PLPCc | PC (16:0/18:2(9Z,12Z)) | 22 | 11 | 0 | |
| PAPEd | PEe (16:0/20:4(5Z,8Z,11Z,14Z)) | 3 | 12 | 0 | |
| POPEf | PE (16:0/18:1(9Z)) | 3 | 14 | 0 | |
| POPIg | PIh (16:0/18:1(9Z)) | 0 | 5 | -1 | |
| PAPSi | PSj (16:0/20:4(5Z,8Z,11Z,14Z)) | 0 | 11 | -1 | |
| POPAk | PAl (16:0/18:1(9Z)) | 0 | 1 | -1 | |
| SSMm | SMn (d18:1/18:0) | 11 | 5 | 0 | |
| NSMo | SM (d18:1/24:1) | 11 | 5 | 0 | |
| CMHp | GlcCerq (d18:1/16:0) | 4 | 0 | 0 | |
| CHOLr | Cholesterol | 37 | 29 | 0 | |
| TOTAL |  | 107 | 100 |  |  | |  |
| System parameters:  Size (Å3): 75.26 x 75.26 x 122.17  # water / Na+ / Cl- : 13544 / 54 / 37  Temperature (K): 313 | | | | | | | |

**Notes:** a POPC, 1-palmitoyl-2-oleoyl-*sn*-phosphatidylcholine; b PC, Phosphatidylcholine; c PLPC, 1-palmitoyl-2-linoleoyl-*sn*-glycero-3-phosphocholine; d PAPE, 1-palmitoyl-2-arachidonoyl-*sn*-glycero-3-phosphoethanolamine; e PE, Phosphatidylethanolamine; f POPE, 1-palmitoyl-2-oleoyl-*sn*-phosphatidylethanolamine; g POPI, 1-palmitoyl-2-oleoyl-*sn*-phosphatidylinositol; h PI, Phosphatidylinositol; i PAPS, 1-palmitoyl-2-arachidonyl-phosphatidylserine; j PS, Phosphatidylserine; k POPA, 1-palmitoyl-2-oleoyl-*sn*-glycero-3-phosphate; l PA, Phosphatidic acid; m SSM, Stearoyl-sphingomyelin; n SM, Spingomyelin; o NSM, N-Stearoyl-D-Sphingomyelin; p CMH, Ceramide Monohexoside; q GlcCer, Glucocerebroside; r CHOL, Cholesterol.

**Table S2 Lipid Compositions of Gram-negative (G-) bacteria outer membrane 3,4**

| Lipid Name | Lipid Head/Tail | #Lipids in Leaflets | | Charge(*e*) | |
| --- | --- | --- | --- | --- | --- |
| Outer | Inner |
| ECLIPA | E.coli R1 core-Lipid A* | 35 | 0 | -10 | |
| PPPEa | PEb (16:0/16:1 (9Z)) | 0 | 75 | 0 | |
| PVPGc | PGd (16:0/18:1(11Z)) | 0 | 20 | -1 | |
| PVCL2e | CLf (1'-[16:0/18:1(11Z)],3'-[16:0/18:1(11Z)]) | 0 | 5 | -2 | |
| TOTAL |  | 35 | 100 |  |  | |  |
| System parameters:  Size (Å3): 81.44 x 81.44 x 129.69  # water / Na+ / Cl- / Ca2+: 14934 / 70 / 40 / 175  Temperature (K): 313 | | | | | | | |

**Notes:** a PPPE, 1-palmitoyl-2-palmitoleoyl-*sn*-phosphatidylethanolamine ; b PE, Phosphatidylethanolamine; c PVPG, 1-palmitoyl-2-vacenoyl-*sn*-phosphatidylglycerol; d PG, Phosphatidylglycerol; e PVCL2: 1,1′-palmitoyl-2,2′-vacenoyl cardiolipin; f CL, Cardiolipin.

**Table S3 Lipid Compositions of Gram-negative (G+) bacteria cell membrane 2,5,6**

| Lipid Name | Lipid Head/Tail | #Lipids in Leaflets | Charge(*e*) |
| --- | --- | --- | --- |
| Outer or Inner |
| MAIPGa | PGb (14:0 /a15:0) | 22 | -1 |
| AIPGc | PG (a15:0 /i15:0) | 27 | -1 |
| PAIPGd | PG (16:0 /a15:0) | 9 | -1 |
| DPPGe | PG (16:0 /16:0) | 7 | -1 |
| MAIPEf | PEg (14:0 /a15:0) | 9 | 0 |
| AIPEh | PE (a15:0 /i15:0) | 11 | 0 |
| PAIPEi | PE (16:0 /a15:0) | 4 | 0 |
| DPPEj | PE (16:0 /16:0) | 3 | 0 |
| PAICL2 | CLk (1'-[16:0 / a15:0],3'-[16:0 / a15:0]) | 8 | -2 |
| TOTAL |  | 100 |  |  |
| System parameters:  Size (Å3): 81.74 x 81.74 x 100  # water / Na+ / Cl- : 12413 / 195 / 33  Temperature (K): 313 | | | | |

**Notes:** a MAIPG, 12-methyl tetradecanoic acid and myristic acid with PG headgroup; b PG, Phosphatidylglycerol; c AIPG, 3-methyl tetradecanoic acid and 12-methyl tetradecanoic acid with PG headgroup; d PAIPG, 12-methyl tetradecanoic acid and palmitic acid with PG headgroup; e DPPG, 1,2-dipalmitoyl-*sn*-glycero-3-phosphoglycerol; f MAIPE, 12-methyl tetradecanoic acid and myristic acid with PE headgroup; g PE, Phosphatidylethanolamine; h AIPE, 13-methyl tetradecanoic acid and 12-methyl tetradecanoic acid with PE headgroup; I PAIPE, 12-methyl tetradecanoic acid and palmitic acid with with PE headgroup; j DPPE, Dipalmitoylphosphatidylethanolamine; k CL, Cardiolipin.

**Table S4 Clog *P* Values of Compounds 5a-t**

| Compd. | clog *P*a | Compd. | clog *P* | Compd. | clog *P* | Compd. | clog *P* |
| --- | --- | --- | --- | --- | --- | --- | --- |
| **1** | 7.35 | **5f** | 2.21 | **5l** | 1.12 | **5r** | 3.24 |
| **5a** | 2.11 | **5g** | 3.27 | **5m** | 3.24 | **5s** | 4.30 |
| **5b** | 3.17 | **5h** | 5.38 | **5n** | 4.3 | **5t** | 6.41 |
| **5c** | 5.29 | **5i** | 6.44 | **5o** | 5.35 |  |  |
| **5d** | 6.35 | **5j** | 7.50 | **5p** | 1.12 |  |  |
| **5e** | 7.40 | **5k** | 0.06 | **5q** | 2.18 |  |  |

**Note:** aclog *P* values were calculated by ChemDraw Ultra 2014 software.

**Table S5 The MIC values of selected antibiotics against *S. aureus* ATCC 29213 and *E. coli* ATCC 25922 in the presence or absence of 32** **μg/mL PG**

| Antibiotics | MICa (μg/mL) | | | |
| --- | --- | --- | --- | --- |
| *S. aureus* ATCC 29213 | | *E. coli* ATCC 25922 | |
| single | + PGb | single | + PG |
| Daptomycin | 2 | 32 | NDc | ND |
| Colistin | ND | ND | 1 | 16 |
| Ceftazidime | 16 | 16 | 4 | 4 |
| Gentamicin | 1 | 1 | 8 | 8 |
| Levofloxacin | 0.5 | 0.5 | 0.25 | 0.25 |
| Tigecycline | 4 | 4 | 2 | 2 |

**Notes:** aMIC, minimum inhibitory concentration;b PG, phosphatidylglycerol; c ND, not determined.

**Spectral Data for Compounds 5a-t**

**Supplementary Data** 1:*(E)-N,N'-(((2-(3,7-dimethylocta-2,6-dien-1-yl)-5-pentyl-1,3-phenylene)bis(oxy))bis(ethane-2,1-diyl))bis(2-(ethylamino)-N,N-dimethyl-2-oxoethan-1-aminium) bromide* (**5a**) : Yield: 70.9%, white solid, 1H NMR (600 MHz, CDCl3) *δ*: 8.78 (t, *J* = 5.4 Hz, 2H), 6.48 (s, 2H), 5.03 – 4.98 (m, 1H), 4.91 (t, *J* = 5.2 Hz, 1H), 4.78 (s, 4H), 4.47 (s, 4H), 4.26 (s, 4H), 3.53 (s, 12H), 3.35 – 3.31 (m, 4H), 3.25 (d, *J* = 5.0 Hz, 2H), 2.61 – 2.54 (m, 2H), 2.03 – 1.94 (m, 2H), 1.94 – 1.88 (m, 2H), 1.69 (s, 3H), 1.64 (s, 3H), 1.63 – 1.57 (m, 3H), 1.39 – 1.31 (m, 4H), 1.21 (t, *J* = 7.3 Hz, 6H), 0.91 (t, *J* = 6.9 Hz, 3H); 13C NMR (151 MHz, CDCl3) *δ*: 162.4, 155.7, 143.7, 136.5, 131.8, 123.7, 122.5, 115.7, 106.2, 65.0, 64.5, 62.4, 53.0, 39.5, 36.5, 34.8, 31.6, 31.3, 26.8, 25.8, 22.5, 22.4, 17.8, 16.8, 14.2, 14.1; HRMS (ESI) C37H66Br2N4O4 [M − 2Br]/2+ calcd = 315.2537; found = 315.2520.

**Supplementary Data 2:** *(E)-N,N'-(((2-(3,7-dimethylocta-2,6-dien-1-yl)-5-pentyl-1,3-phenylene)bis(oxy))bis(ethane-2,1-diyl))bis(N,N-dimethyl-2-oxo-2-(propylamino)ethan-1-aminium) bromide* (**5b**): Yield: 36.5%, white solid, 1H NMR (600 MHz, CDCl3) *δ*: 8.70 (t, *J* = 5.6 Hz, 2H), 6.40 (s, 2H), 4.96 – 4.91 (m, 1H), 4.84 (dd, *J* = 5.8, 4.8 Hz, 1H), 4.71 (s, 4H), 4.43 – 4.35 (m, 4H), 4.22 – 4.14 (m, 4H), 3.45 (s, 12H), 3.17 (dd, *J* = 13.4, 6.7 Hz, 6H), 2.53 – 2.48 (m, 2H), 1.90 (dd, *J* = 14.8, 6.9 Hz, 2H), 1.87 – 1.83 (m, 4H), 1.61 (s, 3H), 1.57 (s, 3H), 1.56 – 1.51 (m, 6H), 1.32 – 1.23 (m, 5H), 0.88 (t, *J* = 7.4 Hz, 6H), 0.84 (t, *J* = 7.0 Hz, 3H); 13C NMR (151 MHz, CDCl3) *δ*: 161.5, 154.6, 142.7, 135.5, 130.8, 122.7, 121.5, 114.6, 105.2, 64.0, 63.5, 61.4, 52.0, 40.6, 38.5, 35.4, 30.6, 30.2, 28.7, 25.8, 24.7, 21.5, 21.3, 21.3, 16.8, 15.8, 13.1, 10.6; HRMS (ESI) C39H70Br2N4O4 [M − 2Br]/2+ calcd = 329.2693; found = 329.2689.

**Supplementary Data 3:** *(E)-N,N'-(((2-(3,7-dimethylocta-2,6-dien-1-yl)-5-pentyl-1,3-phenylene)bis(oxy))bis(ethane-2,1-diyl))bis(N,N-dimethyl-2-oxo-2-(pentylamino)ethan-1-aminium) bromide* (**5c**): Yield: 20.3%, white solid, 1H NMR (600 MHz, CDCl3) *δ*: 8.77 (t, *J* = 5.6 Hz, 2H), 6.47 (s, 2H), 5.03 – 4.98 (m, 1H), 4.90 (dd, *J* = 5.8, 4.8 Hz, 1H), 4.79 (s, 4H), 4.49 – 4.44 (m, 4H), 4.28 – 4.23 (m, 4H), 3.52 (s, 12H), 3.29 – 3.22 (m, 6H), 2.58 (t, 2H), 2.00 – 1.95 (m, 4H), 1.93 – 1.88 (m, 2H), 1.68 (s, 3H), 1.64 (s, 3H), 1.63 – 1.57 (m, 6H), 1.38 – 1.28 (m, 13H), 0.93 – 0.87 (m, 9H); 13C NMR (151 MHz, CDCl3) *δ*: 162.5, 155.7, 143.7, 136.5, 131.8, 123.7, 122.5, 115.7, 106.2, 65.1, 64.6, 62.4, 53.0, 40.0, 39.5, 36.5, 31.6, 31.3, 29.2, 28.6, 26.8, 25.8, 22.5, 22.3, 22.2, 17.8, 16.8, 14.1, 14.0; HRMS (ESI) C43H78Br2N4O4 [M − 2Br]/2+ calcd = 357.3006; found = 357.3002.

**Supplementary Data 4:** *(E)-N,N'-(((2-(3,7-dimethylocta-2,6-dien-1-yl)-5-pentyl-1,3-phenylene)bis(oxy))bis(ethane-2,1-diyl))bis(2-(hexylamino)-N,N-dimethyl-2-oxoethan-1-aminium) bromide* (**5d**):Yield: 40.0%, white solid, 1H NMR (600 MHz, CDCl3) *δ*: 8.78 (t, *J* = 5.6 Hz, 2H), 6.47 (s, 2H), 5.03 – 4.98 (m, 1H), 4.90 (dd, *J* = 5.8, 4.8 Hz, 1H), 4.79 (s, 4H), 4.49 – 4.43 (m, 4H), 4.27 – 4.22 (m, 4H), 3.52 (s, 12H), 3.29 – 3.22 (m, 6H), 2.60 – 2.55 (m, 2H), 1.97 (dd, *J* = 14.7, 6.9 Hz, 2H), 1.92 – 1.89 (m, 4H), 1.68 (s, 3H), 1.64 (s, 3H), 1.63 – 1.57 (m, 6H), 1.40 – 1.31 (m, 9H), 1.31 – 1.24 (m, 8H), 0.91 (t, *J* = 7.0 Hz, 3H), 0.87 (t, *J* = 6.9 Hz, 6H); 13C NMR (151 MHz, CDCl3) *δ*: 162.5, 155.6, 143.7, 136.6, 131.8, 123.7, 122.5, 115.6, 106.2, 65.1, 64.5, 62.4, 53.0, 40.0, 39.5, 36.5, 31.6, 31.4, 31.3, 28.9, 26.8, 26.7, 25.8, 22.5, 22.3, 17.8, 16.8, 14.1, 14.0; HRMS (ESI) C45H82Br2N4O4 [M − 2Br]/2+ calcd = 371.3163; found = 371.3154.

**Supplementary Data 5:** *(E)-N,N'-(((2-(3,7-dimethylocta-2,6-dien-1-yl)-5-pentyl-1,3-phenylene)bis(oxy))bis(ethane-2,1-diyl))bis(2-(heptylamino)-N,N-dimethyl-2-oxoethan-1-aminium) bromide* (**5e**): Yield: 40.9%, white solid, 1H NMR (600 MHz, CDCl3) *δ*: 8.78 (t, *J* = 5.6 Hz, 2H), 6.47 (s, 2H), 5.03 – 4.98 (m, 1H), 4.90 (dd, *J* = 5.7, 4.8 Hz, 1H), 4.79 (s, 4H), 4.49 – 4.43 (m, 4H), 4.27 – 4.21 (m, 4H), 3.52 (s, 12H), 3.29 – 3.22 (m, 6H), 2.60 – 2.55 (m, 1H), 1.98 (dd, *J* = 14.7, 6.9 Hz, 2H), 1.93 – 1.88 (m, 4H), 1.68 (s, 3H), 1.64 (s, 3H), 1.63 – 1.57 (m, 6H), 1.39 – 1.21 (m, 21H), 0.91 (t, *J* = 7.0 Hz, 3H), 0.87 (t, *J* = 7.0 Hz, 6H); 13C NMR (151 MHz, CDCl3) *δ*: 162.5, 155.7, 143.7, 136.6, 131.8, 123.7, 122.5, 115.6, 106.2, 65.1, 64.6, 62.4, 53.0, 40.0, 39.5, 36.5, 31.7, 31.6, 31.3, 29.0, 28.9, 27.0, 26.8, 25.8, 22.6, 22.6, 22.4, 17.8, 16.8, 14.1, 14.1;HRMS (ESI) C47H86Br2N4O4 [M − 2Br]/2+ calcd = 385.3319; found = 385.3319.

**Supplementary Data 6:** *(E)-3,3'-((2-(3,7-dimethylocta-2,6-dien-1-yl)-5-pentyl-1,3-phenylene)bis(oxy))bis(N-(2-(ethylamino)-2-oxoethyl)-N,N-dimethylpropan-1-aminium) bromide* (**5f**): Yield: 60.4%, pale yellow gel, 1H NMR (600 MHz, CDCl3) *δ*: 8.87 (t, *J* = 5.2 Hz, 2H), 6.34 (s, 2H), 5.10 (dd, *J* = 6.7, 5.7 Hz, 1H), 5.05 – 5.00 (m, 1H), 4.68 (s, 4H), 4.11 (dd, *J* = 9.0, 3.4 Hz, 4H), 3.89 – 3.84 (m, 4H), 3.43 (s, 12H), 3.33 – 3.30 (m, 4H), 3.28 (d, *J* = 6.6 Hz, 2H), 2.56 – 2.51 (m, 2H), 2.39 – 2.33 (m, 4H), 2.04 – 2.00 (m, 3H), 1.96 – 1.91 (m, 2H), 1.74 (s, 3H), 1.63 (s, 3H), 1.61 – 1.56 (m, 2H), 1.35 – 1.29 (m, 4H), 1.26 (t, *J* = 7.1 Hz, 2H), 1.21 (t, *J* = 7.3 Hz, 6H), 0.90 (t, *J* = 7.0 Hz, 3H); 13C NMR (151 MHz, CDCl3) *δ*:162.6, 156.8, 142.5, 134.3, 131.5, 124.0, 123.3, 115.7, 105.5, 67.0, 65.9, 63.3, 52.0, 41.6, 39.9, 36.5, 31.7, 31.3, 26.8, 26.3, 25.7, 22.6, 22.5, 22.3, 20.1, 17.8, 16.4, 14.1, 11.6; HRMS (ESI) C39H70Br2N4O4 [M − 2Br]/2+ calcd = 329.2693; found = 329.2683.

**Supplementary Data 7:** *(E)-3,3'-((2-(3,7-dimethylocta-2,6-dien-1-yl)-5-pentyl-1,3-phenylene)bis(oxy))bis(N,N-dimethyl-N-(2-oxo-2-(propylamino)ethyl)propan-1-aminium) bromide* (**5g**): Yield: 45.3%, pale yellow gel, 1H NMR (600 MHz, CDCl3) *δ*: 8.86 (t, *J* = 5.6 Hz, 2H), 6.34 (s, 2H), 5.10 (dd, *J* = 6.7, 5.6 Hz, 1H), 5.05 – 5.00 (m, 1H), 4.69 (s, 4H), 4.10 (t, *J* = 5.5 Hz, 4H), 3.89 – 3.84 (m, 4H), 3.42 (s, 12H), 3.27 (d, *J* = 6.6 Hz, 2H), 3.24 (dd, *J* = 13.4, 6.8 Hz, 4H), 2.55 – 2.51 (m, 2H), 2.40 – 2.33 (m, 4H), 2.02 (dd, *J* = 14.9, 7.1 Hz, 2H), 1.97 – 1.91 (m, 3H), 1.74 (s, 3H), 1.63 (s, 3H), 1.63 – 1.56 (m, 8H), 1.35 – 1.29 (m, 4H), 0.95 (t, *J* = 7.4 Hz, 6H), 0.90 (t, *J* = 7.0 Hz, 3H); 13C NMR (151 MHz, CDCl3) *δ*:162.5, 156.2, 142.7, 134.5, 131.7, 123.9, 123.4, 115.7, 105.7, 64.4, 64.2, 63.1, 52.3, 41.6, 39.8, 36.4, 31.6, 31.2, 26.9, 25.7, 23.6, 22.6, 22.4, 22.3, 17.8, 16.6, 14.1, 11.6; HRMS (ESI) C41H74Br2N4O4 [M − 2Br]/2+ calcd = 343.2850; found = 343.2841.

**Supplementary Data 8:** *(E)-3,3'-((2-(3,7-dimethylocta-2,6-dien-1-yl)-5-pentyl-1,3-phenylene)bis(oxy))bis(N,N-dimethyl-N-(2-oxo-2-(pentylamino)ethyl)propan-1-aminium) bromide* (**5h**): Yield: 62.0%, white gel, 1H NMR (600 MHz, CDCl3) *δ*: 8.86 (t, *J* = 5.6 Hz, 2H), 6.35 (s, 2H), 5.13 (dd, *J* = 7.0, 5.9 Hz, 1H), 5.04 – 5.00 (m, 1H), 4.65 (s, 4H), 4.03 (t, *J* = 5.8 Hz, 4H), 3.76 – 3.71 (m, 4H), 3.39 (s, 12H), 3.29 (d, *J* = 6.8 Hz, 2H), 3.22 (dd, *J* = 13.3, 6.8 Hz, 4H), 2.55 – 2.51 (m, 2H), 2.07 – 2.00 (m, 6H), 1.93 – 1.82 (m, 8H), 1.73 (s, 3H), 1.63 (s, 3H), 1.62 – 1.57 (m, 7H), 1.36 – 1.31 (m, 4H), 0.95 (t, *J* = 7.4 Hz, 6H), 0.90 (t, *J* = 6.9 Hz, 3H); 13C NMR (151 MHz, CDCl3) *δ*: 162.4, 156.2, 142.8, 134.5, 131.7, 123.8, 123.4, 115.7, 105.7, 64.4, 64.3, 63.1, 52.3, 39.9, 39.8, 36.4, 31.6, 31.3, 29.2, 28.6, 26.9, 25.7, 23.6, 22.6, 22.4, 22.3, 17.8, 16.6, 14.1, 14.0; HRMS (ESI) C45H82Br2N4O4 [M − 2Br]/2+ calcd = 371.3163; found = 371.3155.

**Supplementary Data 9:** *(E)-3,3'-((2-(3,7-dimethylocta-2,6-dien-1-yl)-5-pentyl-1,3-phenylene)bis(oxy))bis(N-(2-(hexylamino)-2-oxoethyl)-N,N-dimethylpropan-1-aminium) bromide* (**5i**): Yield: 50.0%, pale yellow gel, 1H NMR (600 MHz, CDCl3) *δ*: 8.81 (t, *J* = 5.5 Hz, 2H), 6.27 (s, 2H), 5.03 (t, *J* = 6.4 Hz, 1H), 4.96 (t, *J* = 6.9 Hz, 1H), 4.62 (s, 4H), 4.03 (t, *J* = 5.4 Hz, 4H), 3.82 – 3.76 (m, 4H), 3.35 (s, 12H), 3.21 – 3.16 (m, 3H), 2.48 – 2.44 (m, 2H), 2.32 – 2.25 (m, 4H), 1.98 – 1.92 (m, 2H), 1.89 – 1.85 (m, 2H), 1.67 (s, 3H), 1.56 (s, 3H), 1.53 – 1.49 (m, 5H), 1.30 – 1.18 (m, 20H), 0.83 (t, *J* = 7.0 Hz, 3H), 0.80 (t, *J* = 6.8 Hz, 6H); 13C NMR (151 MHz, CDCl3) *δ*: 161.4, 155.2, 141.8, 133.5, 130.7, 122.8, 122.3, 114.6, 104.7, 63.4, 63.3, 62.1, 51.3, 38.9, 38.8, 35.4, 30.6, 30.3, 30.2, 27.9, 25.9, 25.7, 24.7, 22.6, 21.5, 21.5, 16.8, 15.6, 13.1, 13.0; HRMS (ESI) C47H86Br2N4O4 [M − 2Br]/2+ calcd = 385.3319; found = 385.3309.

**Supplementary Data 10:** *(E)-3,3'-((2-(3,7-dimethylocta-2,6-dien-1-yl)-5-pentyl-1,3-phenylene)bis(oxy))bis(N-(2-(heptylamino)-2-oxoethyl)-N,N-dimethylpropan-1-aminium) bromide* (**5j**): Yield: 50.0%, pale yellow gel, 1H NMR (600 MHz, CDCl3) *δ*: 8.79 (t, *J* = 5.6 Hz, 2H), 6.27 (s, 2H), 5.03 (dd, *J* = 6.7, 5.8 Hz, 1H), 4.97 – 4.94 (m, 1H), 4.61 (s, 4H), 4.03 (t, *J* = 5.4 Hz, 4H), 3.83 – 3.75 (m, 4H), 3.34 (s, 12H), 3.23 – 3.14 (m, 6H), 2.51 – 2.43 (m, 2H), 2.34 – 2.23 (m, 4H), 2.00 – 1.93 (m, 2H), 1.89 – 1.84 (m, 2H), 1.67 (s, 3H), 1.56 (s, 3H), 1.54 – 1.49 (m, 5H), 1.29 – 1.16 (m, 24H), 0.83 (t, *J* = 7.0 Hz, 3H), 0.80 (t, *J* = 7.0 Hz, 6H); 13C NMR (151 MHz, CDCl3) *δ*: 161.4, 155.2, 141.8, 133.5, 130.7, 122.8, 122.3, 114.7, 104.7, 63.4, 63.3, 62.1, 51.3, 39.0, 38.8, 35.4, 30.7, 30.6, 30.2, 27.9, 27.9, 26.0, 25.9, 24.7, 22.6, 21.6, 21.5, 16.8, 15.6, 13.1; HRMS (ESI) C49H90Br2N4O4 [M − 2Br]/2+ calcd = 399.3476; found = 399.3472.

**Supplementary Data 11:** *(E)-4,4'-((2-(3,7-dimethylocta-2,6-dien-1-yl)-5-pentyl-1,3-phenylene)bis(oxy))bis(N-(2-(ethylamino)-2-oxoethyl)-N,N-dimethylbutan-1-aminium) bromide* (**5k**): Yield: 40.8%, white gel, 1H NMR (600 MHz, CDCl3) *δ*: 8.81 (t, *J* = 5.4 Hz, 2H), 6.28 (s, 2H), 5.06 (dd, *J* = 7.0, 6.0 Hz, 1H), 5.00 – 4.91 (m, 1H), 4.55 (s, 4H), 3.96 (t, *J* = 5.7 Hz, 4H), 3.70 – 3.65 (m, 4H), 3.32 (s, 12H), 3.27 – 3.19 (m, 6H), 2.50 – 2.42 (m, 2H), 2.01 – 1.92 (m, 6H), 1.87 – 1.80 (m, 4H), 1.66 (s, 3H), 1.56 (s, 3H), 1.54 – 1.50 (m, 3H), 1.31 – 1.23 (m, 6H), 1.13 (t, *J* = 7.3 Hz, 6H), 0.83 (t, *J* = 6.9 Hz, 3H); 13C NMR (151 MHz, CDCl3) *δ*: 161.4, 155.7, 141.4, 133.3, 130.5, 123.0, 122.2, 114.6, 104.5, 66.0, 64.8, 62.2, 51.0, 38.9, 35.5, 33.7, 30.6, 30.3, 25.8, 25.2, 24.7, 21.5, 21.5, 19.1, 16.8, 15.4, 13.1, 13.1; HRMS (ESI) C41H74Br2N4O4 [M − 2Br]/2+ calcd = 343.2850; found = 343.2839.

**Supplementary Data 12:** *(E)-4,4'-((2-(3,7-dimethylocta-2,6-dien-1-yl)-5-pentyl-1,3-phenylene)bis(oxy))bis(N,N-dimethyl-N-(2-oxo-2-(propylamino)ethyl)butan-1-aminium) bromide* (**5l**): Yield: 71.2%, white gel, 1H NMR (600 MHz, CDCl3) *δ*: 8.86 (t, *J* = 5.6 Hz, 2H), 6.35 (s, 2H), 5.13 (dd, *J* = 7.0, 5.9 Hz, 1H), 5.04 – 5.00 (m, 1H), 4.65 (s, 4H), 4.03 (t, *J* = 5.8 Hz, 4H), 3.76 – 3.71 (m, 4H), 3.39 (s, 12H), 3.29 (d, *J* = 6.8 Hz, 2H), 3.22 (dd, *J* = 13.3, 6.8 Hz, 4H), 2.55 – 2.51 (m, 2H), 2.07 – 2.00 (m, 6H), 1.93 – 1.82 (m, 8H), 1.73 (s, 3H), 1.63 (s, 3H), 1.62 – 1.57 (m, 7H), 1.36 – 1.31 (m, 4H), 0.95 (t, *J* = 7.4 Hz, 6H), 0.90 (t, *J* = 6.9 Hz, 3H); 13C NMR (151 MHz, CDCl3) *δ*:162.5, 156.2, 142.7, 134.5, 131.7, 123.9, 123.4, 115.7, 105.7, 64.4, 64.2, 63.1, 52.3, 41.6, 39.8, 36.4, 31.6, 31.2, 26.9, 25.7, 23.6, 22.6, 22.4, 22.3, 17.8, 16.6, 14.1, 11.6; HRMS (ESI) C43H78Br2N4O4 [M − 2Br]/2+ calcd = 357.3006; found = 357.2994.

**Supplementary Data 13:** *(E)-4,4'-((2-(3,7-dimethylocta-2,6-dien-1-yl)-5-pentyl-1,3-phenylene)bis(oxy))bis(N,N-dimethyl-N-(2-oxo-2-(pentylamino)ethyl)butan-1-aminium) bromide* (**5m**): Yield: 62.9%, white gel, 1H NMR (600 MHz, CDCl3) *δ*: 1H NMR (600 MHz, CDCl3) δ 8.88 (t, *J* = 5.6 Hz, 2H), 6.35 (s, 2H), 5.13 (dd, *J* = 7.0, 6.1 Hz, 1H), 5.05 – 4.99 (m, 1H), 4.63 (s, 4H), 4.02 (t, *J* = 5.7 Hz, 4H), 3.76 – 3.72 (m, 4H), 3.38 (s, 12H), 3.28 (d, *J* = 6.9 Hz, 2H), 3.25 (dd, *J* = 14.3, 6.2 Hz, 4H), 2.55 – 2.52 (m, 2H), 2.07 – 2.00 (m, 6H), 1.96 – 1.86 (m, 8H), 1.73 (s, 3H), 1.63 (s, 3H), 1.61 – 1.57 (m, 7H), 1.33 – 1.30 (m, 12H), 0.91 – 0.88 (m, 9H); 13C NMR (151 MHz, CDCl3) *δ*: 162.5, 156.8, 142.5, 134.3, 131.5, 124.0, 123.3, 115.6, 105.5, 67.0, 65.9, 63.3, 51.9, 39.9, 36.5, 31.7, 31.3, 29.2, 28.6, 26.8, 26.3, 25.7, 22.6, 22.3, 20.1, 17.8, 16.4, 14.1, 14.0; HRMS (ESI) C47H86Br2N4O4 [M − 2Br]/2+ calcd = 385.3319; found = 385.3314.

**Supplementary Data 14:** *(E)-4,4'-((2-(3,7-dimethylocta-2,6-dien-1-yl)-5-pentyl-1,3-phenylene)bis(oxy))bis(N-(2-(hexylamino)-2-oxoethyl)-N,N-dimethylbutan-1-aminium) bromide* (**5n**): Yield: 61.2%, pale yellow gel, 1H NMR (600 MHz, CDCl3) *δ*: 8.88 (t, *J* = 5.4 Hz, 2H), 6.35 (s, 2H), 5.13 (t, *J* = 6.5 Hz, 1H), 5.05 – 5.00 (m, 1H), 4.63 (s, 4H), 4.02 (t, *J* = 5.7 Hz, 4H), 3.77 – 3.71 (m, 4H), 3.38 (s, 12H), 3.28 (d, *J* = 6.9 Hz, 2H), 3.25 (dd, *J* = 13.4, 7.1 Hz, 4H), 2.55 – 2.51 (m, 2H), 2.09 – 1.98 (m, 6H), 1.94 – 1.86 (m, 6H), 1.73 (s, 3H), 1.63 (s, 3H), 1.61 – 1.56 (m, 5H), 1.37 – 1.23 (m, 20H), 0.90 (t, *J* = 6.9 Hz, 3H), 0.87 (t, *J* = 6.9 Hz, 6H); 13C NMR (151 MHz, CDCl3) *δ*: 162.5, 156.8, 142.5, 134.3, 131.5, 124.0, 123.3, 115.6, 105.5, 67.0, 65.9, 63.3, 51.9, 40.0, 39.9, 36.5, 31.7, 31.4, 31.3, 28.9, 26.8, 26.7, 26.3, 25.7, 22.6, 22.5, 20.1, 17.8, 16.4, 14.1, 14.1; HRMS (ESI) C49H90Br2N4O4 [M − 2Br]/2+ calcd = 399.3476; found = 399.3466.

**Supplementary Data 15:** *(E)-4,4'-((2-(3,7-dimethylocta-2,6-dien-1-yl)-5-pentyl-1,3-phenylene)bis(oxy))bis(N-(2-(heptylamino)-2-oxoethyl)-N,N-dimethylbutan-1-aminium) bromide* (**5o**): Yield: 69.1%, white gel, 1H NMR (600 MHz, CDCl3) *δ*: 8.86 (t, *J* = 5.3 Hz, 2H), 6.35 (s, 2H), 5.13 (t, *J* = 6.5 Hz, 1H), 5.04 – 5.01 (m, 1H), 4.64 (s, 4H), 4.02 (t, *J* = 5.7 Hz, 4H), 3.77 – 3.71 (m, 4H), 3.38 (s, 12H), 3.28 (d, *J* = 6.8 Hz, 2H), 3.24 (dd, *J* = 13.8, 6.7 Hz, 4H), 2.55 – 2.51 (m, 2H), 2.09 – 1.97 (m, 6H), 1.96 – 1.88 (m, 6H), 1.73 (s, 3H), 1.63 (s, 3H), 1.62 – 1.56 (m, 7H), 1.36 – 1.24 (m, 22H), 0.90 (t, *J* = 6.9 Hz, 3H), 0.87 (t, *J* = 7.0 Hz, 6H); 13C NMR (151 MHz, CDCl3) *δ*: 162.5, 156.8, 142.5, 134.3, 131.5, 124.0, 123.3, 115.6, 105.5, 67.0, 65.9, 63.3, 52.0, 40.0, 39.9, 36.5, 31.7, 31.7, 31.3, 29.0, 28.9, 27.0, 26.8, 26.3, 25.7, 22.6, 22.6, 20.1, 17.8, 16.4, 14.1; HRMS (ESI) C51H94Br2N4O4 [M − 2Br]/2+ calcd = 413.3632; found = 413.3630.

**Supplementary Data 16:** *(E)-5,5'-((2-(3,7-dimethylocta-2,6-dien-1-yl)-5-pentyl-1,3-phenylene)bis(oxy))bis(N-(2-(ethylamino)-2-oxoethyl)-N,N-dimethylpentan-1-aminium) bromide* (**5p**): Yield: 37.0%, pale yellow gel, 1H NMR (600 MHz, DMSO-d6) *δ*: 8.60 (t, *J* = 5.2 Hz, 2H), 6.41 (s, 2H), 5.11 (dd, *J* = 7.3, 6.3 Hz, 1H), 5.04 – 5.01 (m, 1H), 4.05 (s, 4H), 3.94 (t, *J* = 6.3 Hz, 4H), 3.52 – 3.38 (m, 4H), 3.19 (s, 12H), 3.17 – 3.12 (m, 6H), 1.99 (dd, *J* = 14.7, 7.2 Hz, 2H), 1.91 – 1.88 (m, 2H), 1.80 – 1.73 (m, 10H), 1.70 (s, 3H), 1.59 (s, 3H), 1.57 – 1.53 (m, 3H), 1.52 (s, 2H), 1.49 – 1.41 (m, 4H), 1.36 – 1.24 (m, 4H), 1.05 (t, *J* = 7.2 Hz, 6H), 0.87 (t, *J* = 7.0 Hz, 3H); 13C NMR (151 MHz, DMSO-d6) *δ*: 162.2, 156.1, 140.8, 132.5, 130.0, 123.5, 122.5, 113.7, 104.2, 66.6, 63.6, 61.1, 54.3, 52.6, 50.7, 35.2, 33.0, 30.4, 30.2, 27.9, 25.6, 24.9, 21.8, 21.4, 21.1, 16.9, 15.3, 13.6, 13.4; HRMS (ESI) C43H78Br2N4O4 [M − 2Br]/2+ calcd = 357.3006; found = 357.2997.

**Supplementary Data 17:** *(E)-5,5'-((2-(3,7-dimethylocta-2,6-dien-1-yl)-5-pentyl-1,3-phenylene)bis(oxy))bis(N,N-dimethyl-N-(2-oxo-2-(propylamino)ethyl)pentan-1-aminium) bromide* (**5q**): Yield: 38.8%, white gel, 1H NMR (600 MHz, CDCl3) *δ*: 8.87 (t, *J* = 5.5 Hz, 2H), 6.34 (s, 2H), 5.17 (dd, *J* = 7.2, 6.1 Hz, 1H), 5.07 – 5.04 (m, 1H), 4.61 (s, 4H), 3.99 (t, *J* = 5.8 Hz, 4H), 3.68 – 3.63 (m, 4H), 3.37 (s, 12H), 3.28 (d, *J* = 7.1 Hz, 2H), 3.24 (dd, *J* = 13.5, 6.6 Hz, 4H), 2.55 – 2.51 (m, 2H), 2.03 (dd, *J* = 14.9, 7.1 Hz, 2H), 1.95 – 1.83 (m, 12H), 1.74 (s, 3H), 1.63 (s, 3H), 1.62 – 1.58 (m, 11H), 1.36 – 1.31 (m, 4H), 0.95 (t, *J* = 7.4 Hz, 6H), 0.90 (t, *J* = 6.8 Hz, 3H); 13C NMR (151 MHz, CDCl3) *δ*: 162.6, 157.0, 142.2, 134.1, 131.4, 124.3, 123.2, 115.5, 105.0, 67.5, 66.2, 63.3, 51.9, 41.6, 39.9, 36.5, 31.7, 31.3, 28.7, 26.8, 25.7, 23.2, 22.7, 22.6, 22.3, 17.8, 16.3, 14.1, 11.6; HRMS (ESI) C45H82Br2N4O4 [M − 2Br]/2+ calcd = 371.3163; found = 371.3154.

**Supplementary Data 18:** *(E)-5,5'-((2-(3,7-dimethylocta-2,6-dien-1-yl)-5-pentyl-1,3-phenylene)bis(oxy))bis(N,N-dimethyl-N-(2-oxo-2-(pentylamino)ethyl)pentan-1-aminium) bromide* (**5r**): Yield: 36.0%, pale yellow gel, 1H NMR (600 MHz, DMSO-d6) *δ*:8.59 (s, 2H), 6.41 (s, 2H), 5.11 (t, *J* = 6.8 Hz, 1H), 5.03 (t, *J* = 6.7 Hz, 1H), 4.07 (s, 4H), 3.93 (t, *J* = 6.0 Hz, 4H), 3.50 – 3.46 (m, 4H), 3.19 (s, 12H), 3.10 (d, *J* = 5.7 Hz, 6H), 1.99 (dd, *J* = 13.6, 7.5 Hz, 2H), 1.93 – 1.85 (m, 2H), 1.76 (d, *J* = 5.9 Hz, 10H), 1.70 (s, 3H), 1.59 (s, 3H), 1.57 – 1.54 (m, 2H), 1.52 (s, 3H), 1.43 (d, *J* = 5.7 Hz, 10H), 1.31 – 1.26 (m, 10H), 0.86 (t, *J* = 6.7 Hz, 9H); 13C NMR (151 MHz, DMSO-d6) *δ*: 162.3, 156.1, 140.8, 132.5, 130.0, 123.5, 122.5, 113.7, 104.2, 66.6, 63.5, 61.1, 50.7, 37.9, 35.2, 30.5, 30.2, 27.9, 27.7, 25.6, 24.9, 21.8, 21.4, 21.1, 21.1, 16.9, 15.3, 13.4, 13.3; HRMS (ESI) C49H90Br2N4O4 [M − 2Br]/2+ calcd = 399.3476; found = 399.3468.

**Supplementary Data 19:** *(E)-5,5'-((2-(3,7-dimethylocta-2,6-dien-1-yl)-5-pentyl-1,3-phenylene)bis(oxy))bis(N-(2-(hexylamino)-2-oxoethyl)-N,N-dimethylpentan-1-aminium) bromide* (**5s**): Yield: 46.9%, pale yellow gel, 1H NMR (600 MHz, CDCl3) *δ*:8.87 (t, *J* = 5.6 Hz, 2H), 6.34 (s, 2H), 5.17 (dd, *J* = 7.2, 6.0 Hz, 1H), 5.11 – 4.99 (m, 1H), 4.61 (s, 4H), 4.00 (t, *J* = 5.8 Hz, 4H), 3.67 – 3.62 (m, 4H), 3.35 (s, 12H), 3.32 – 3.22 (m, 6H), 2.60 – 2.48 (m, 2H), 2.07 – 2.00 (m, 2H), 1.98 – 1.84 (m, 10H), 1.73 (s, 3H), 1.64 (s, 3H), 1.62 – 1.57 (m, 9H), 1.35 – 1.31 (m, 8H), 1.31 – 1.25 (m, 12H), 0.90 (t, *J* = 7.0 Hz, 3H), 0.87 (t, *J* = 6.9 Hz, 6H); 13C NMR (151 MHz, CDCl3) *δ*: 161.5, 155.9, 141.2, 133.1, 130.4, 123.3, 122.1, 114.5, 104.0, 66.4, 65.3, 62.3, 50.9, 38.9, 38.9, 35.5, 30.7, 30.3, 30.3, 27.9, 27.7, 25.8, 25.7, 24.7, 22.2, 21. 7, 21.5, 16.7, 15.3, 13.1, 13.0; HRMS (ESI) C51H94Br2N4O4 [M − 2Br]/2+ calcd = 413.3632; found = 413.3613.

**Supplementary Data 20:** *(E)-5,5'-((2-(3,7-dimethylocta-2,6-dien-1-yl)-5-pentyl-1,3-phenylene)bis(oxy))bis(N-(2-(heptylamino)-2-oxoethyl)-N,N-dimethylpentan-1-aminium) bromide* (**5t**): Yield: 85.8%, white gel, 1H NMR (600 MHz, CDCl3) *δ*: 8.85 (t, *J* = 4.9 Hz, 2H), 6.34 (s, 2H), 5.17 (t, *J* = 6.7 Hz, 1H), 5.07 – 5.04 (m, 1H), 4.62 (s, 4H), 3.99 (t, *J* = 5.8 Hz, 4H), 3.68 – 3.62 (m, 4H), 3.37 (s, 12H), 3.30 – 3.23 (m, 6H), 2.55 – 2.51 (m, 2H), 2.03 (dd, *J* = 15.1, 7.3 Hz, 2H), 1.96 – 1.85 (m, 12H), 1.74 (s, 3H), 1.63 (s, 3H), 1.62 – 1.58 (m, 9H), 1.36 – 1.22 (m, 22H), 0.90 (t, *J* = 6.9 Hz, 3H), 0.87 (t, *J* = 7.0 Hz, 6H); 13C NMR (151 MHz, CDCl3) *δ*: 162.5, 157.0, 142.2, 134.1, 131.4, 124.3, 123.2, 115.5, 105.0, 67.5, 66.2, 63.3, 51.9, 40.0, 39.9, 36.5, 31.7, 31.7, 31.3, 29.0, 28.9, 28.8, 27.0, 26.8, 25.7, 23.2, 22.7, 22.6, 22.6, 17.8, 16.3, 14.1, 14.1; HRMS (ESI) C53H98Br2N4O4 [M − 2Br]/2+ calcd = 427.3789; found = 427.3780.

**NMR and HRMS Spectra of Compounds 5a-t**

**
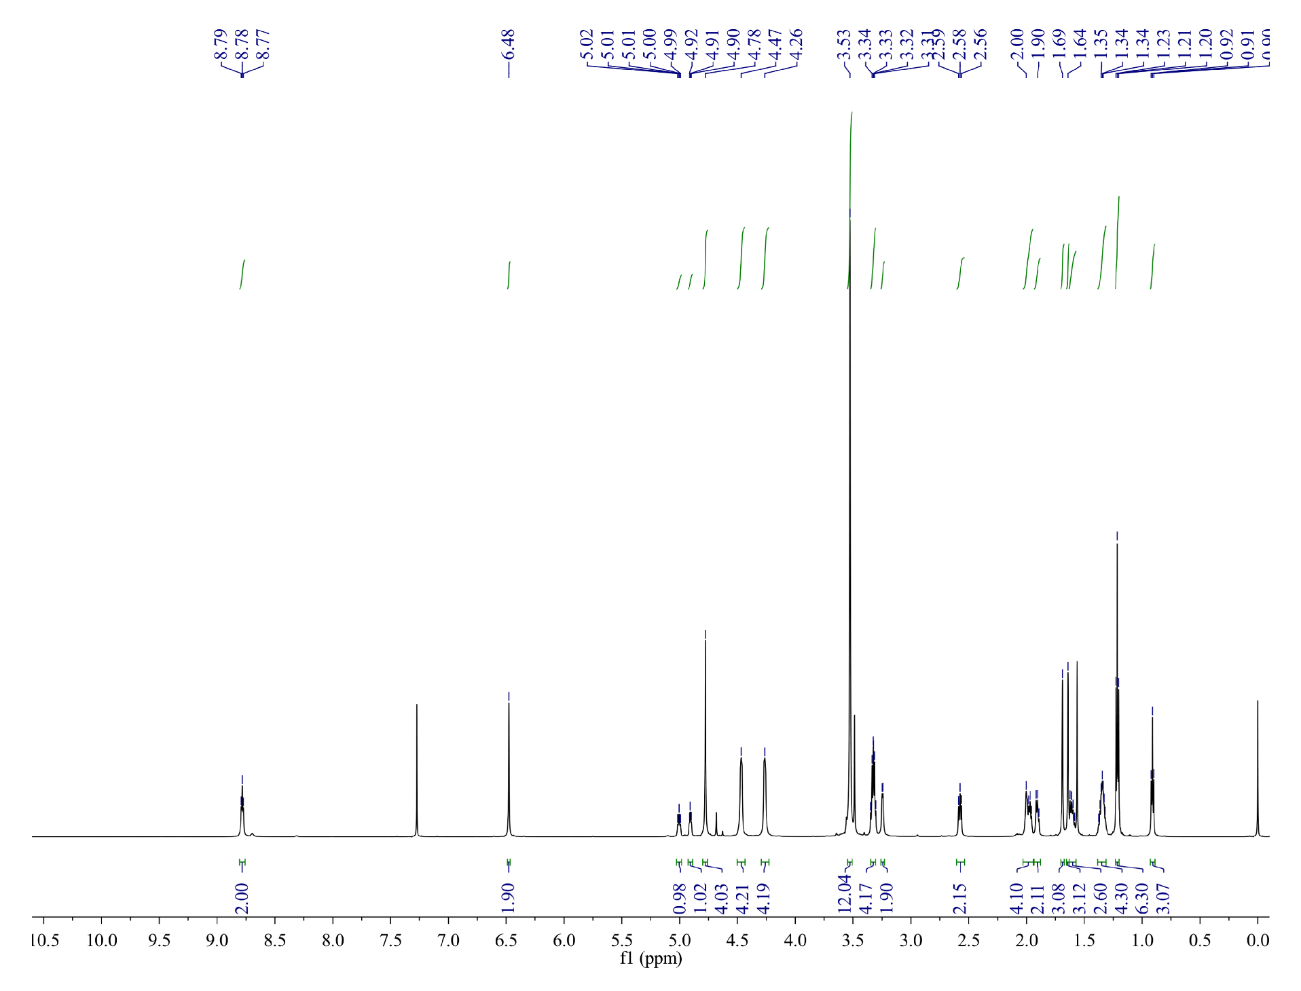
**

**Fig S1. 1H NMR spectrum of 5a**


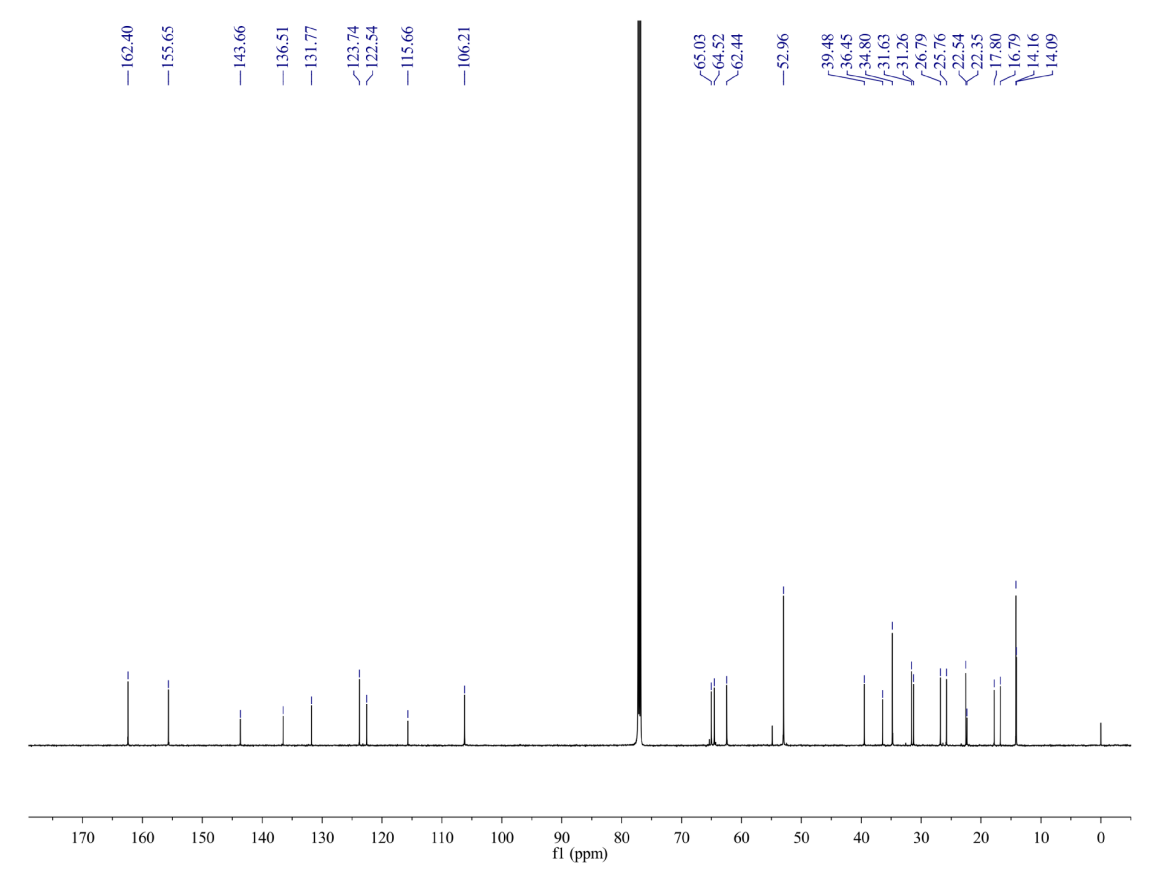


**Fig S2. 13C NMR spectrum of 5a**

**
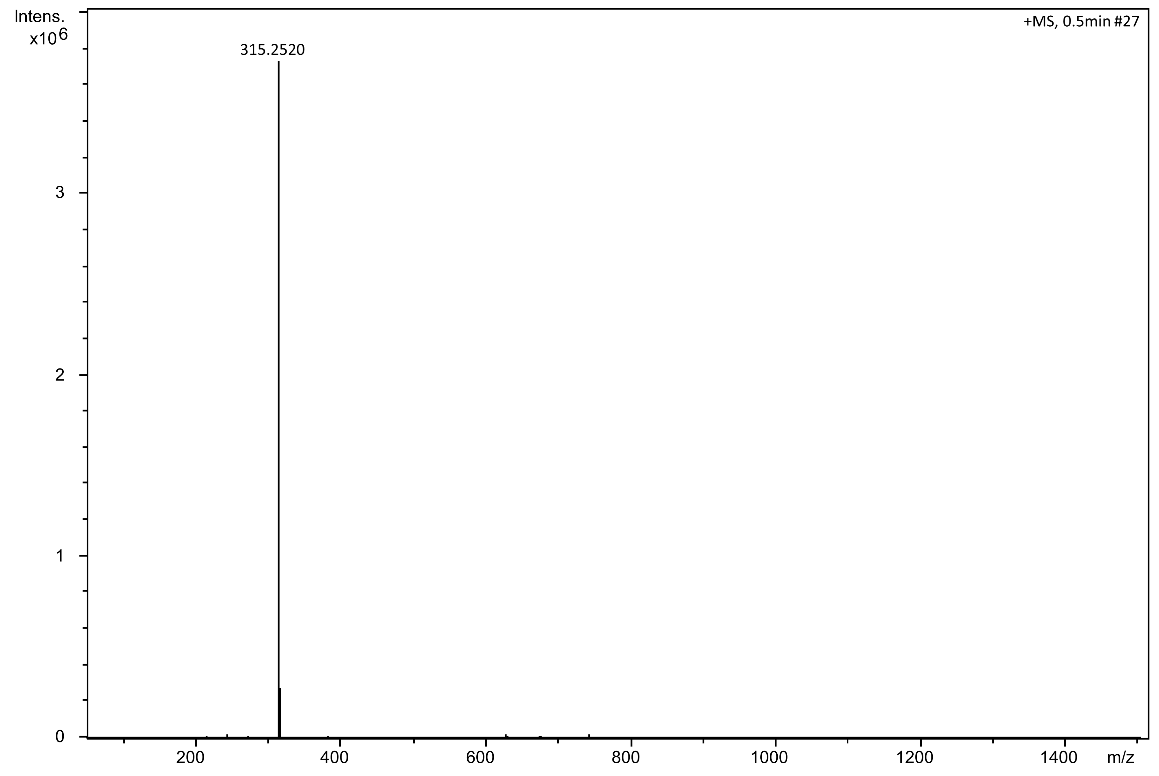
**

**Fig S3. HRMS spectrum of 5a**


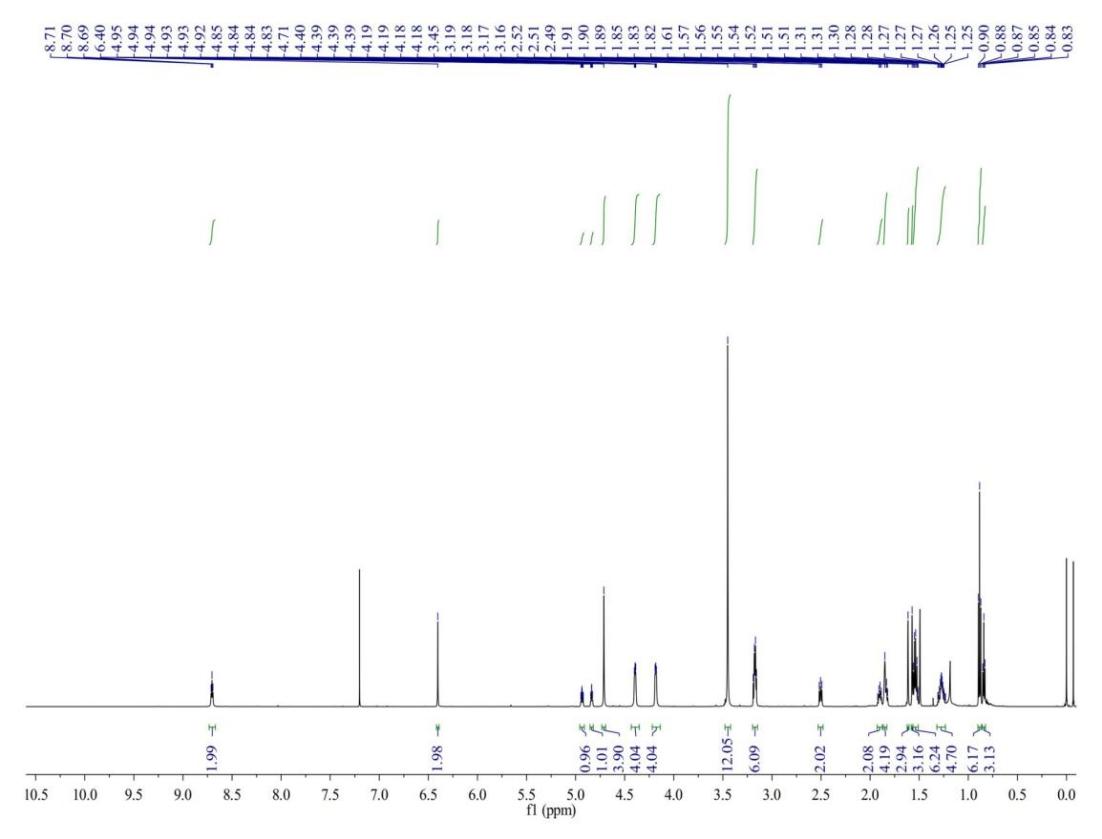


**Fig S4. 1H NMR spectrum of 5b**


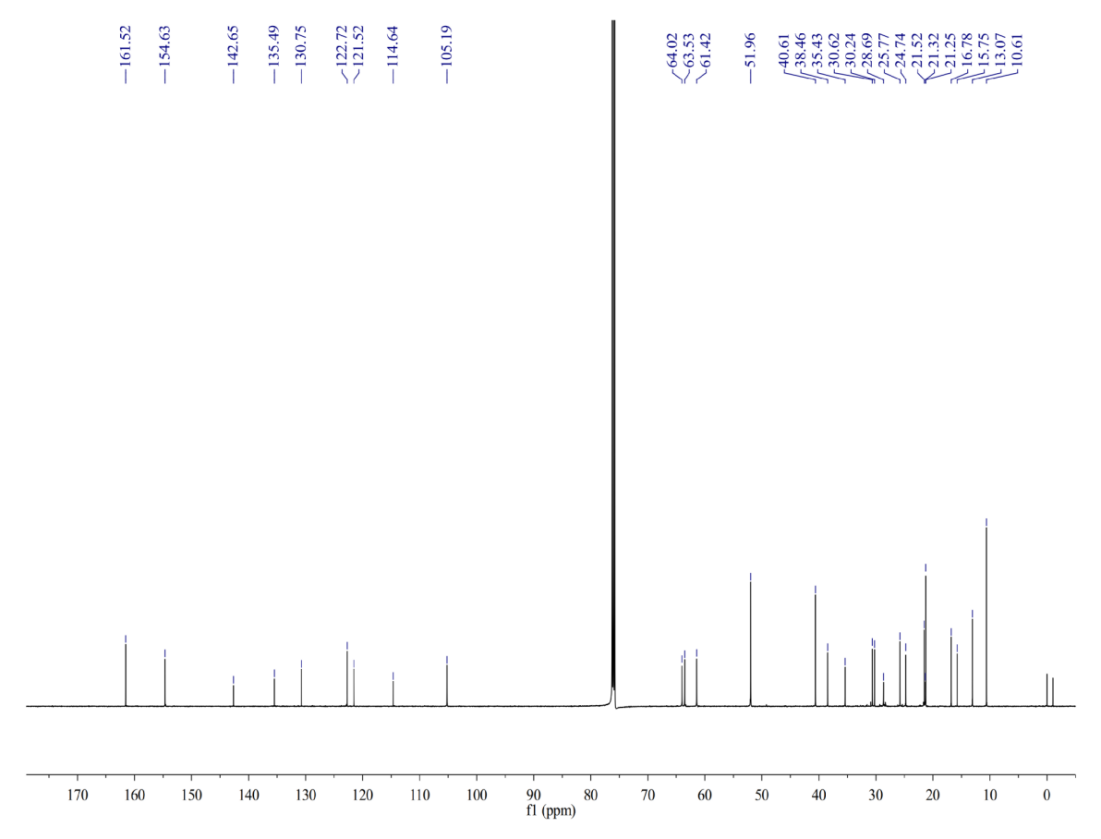


**Fig S5. 13C NMR spectrum of 5b**


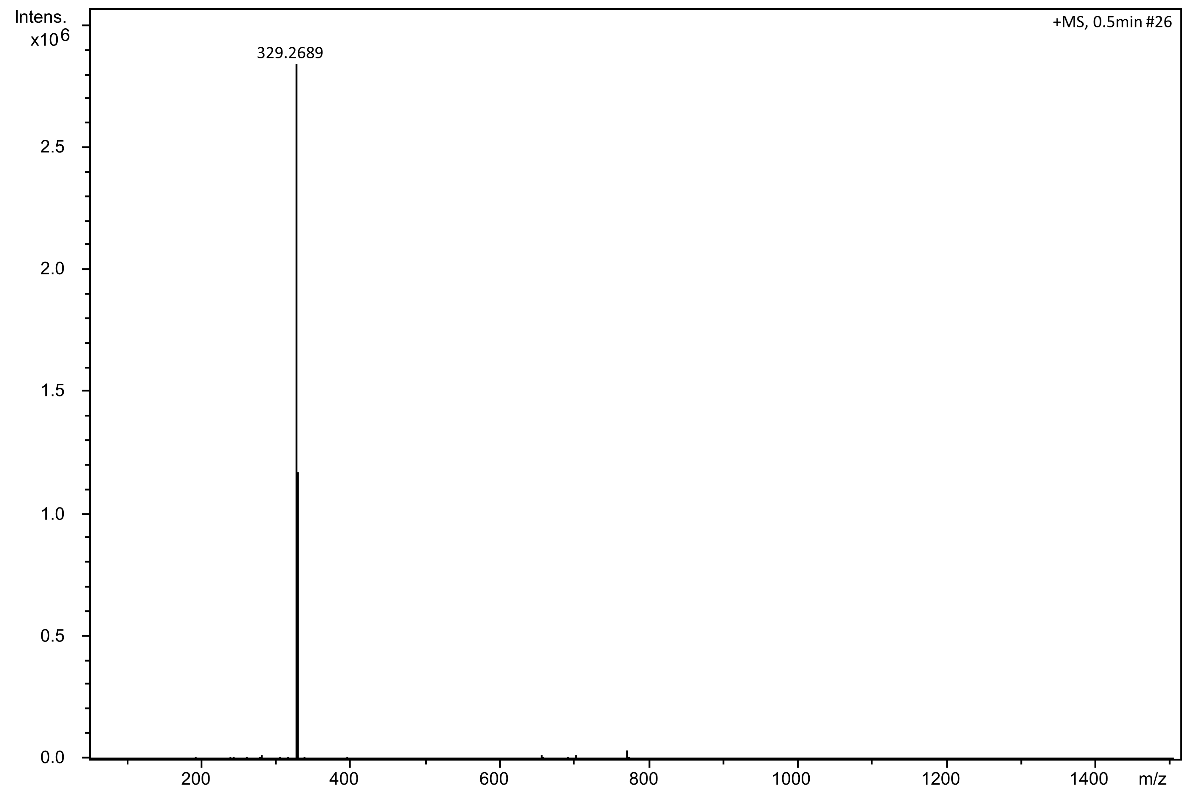


**Fig S6. HRMS spectrum of 5b**


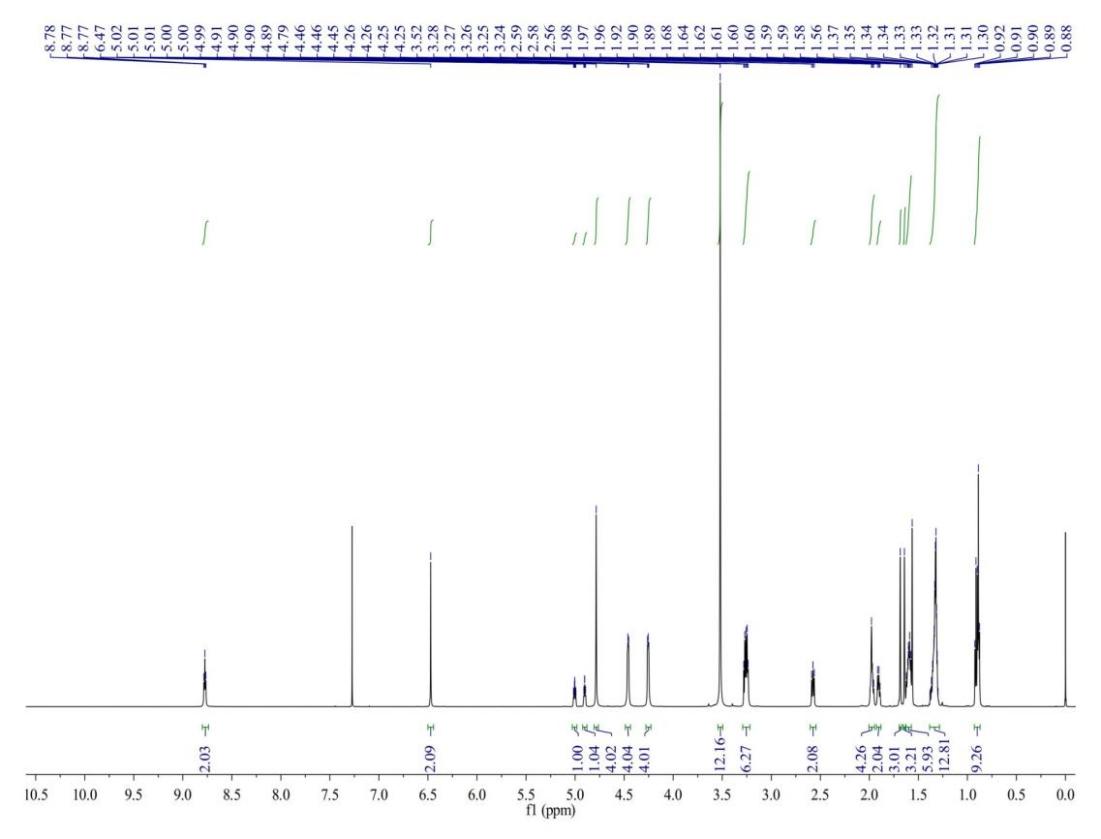


**Fig S7. 1H NMR spectrum of 5c**

**
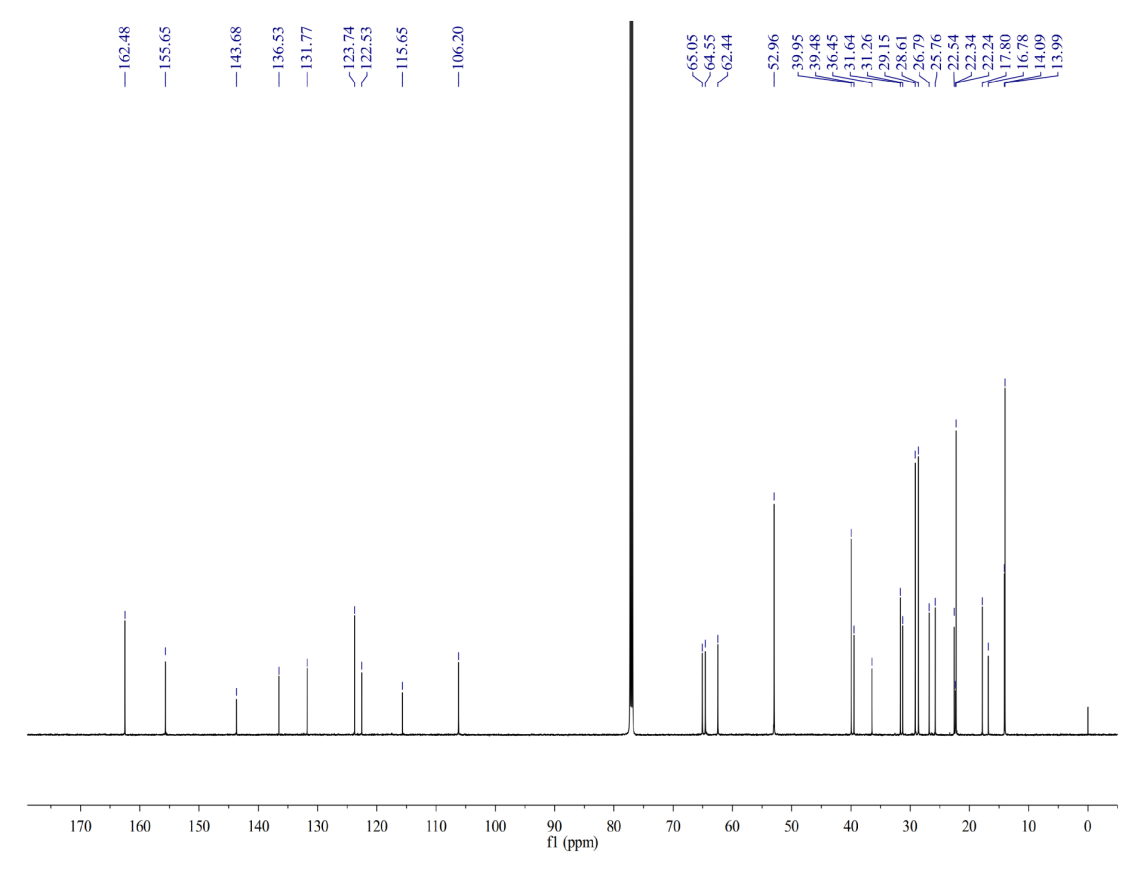
**

**Fig S8. 13C NMR spectrum of 5c**

**
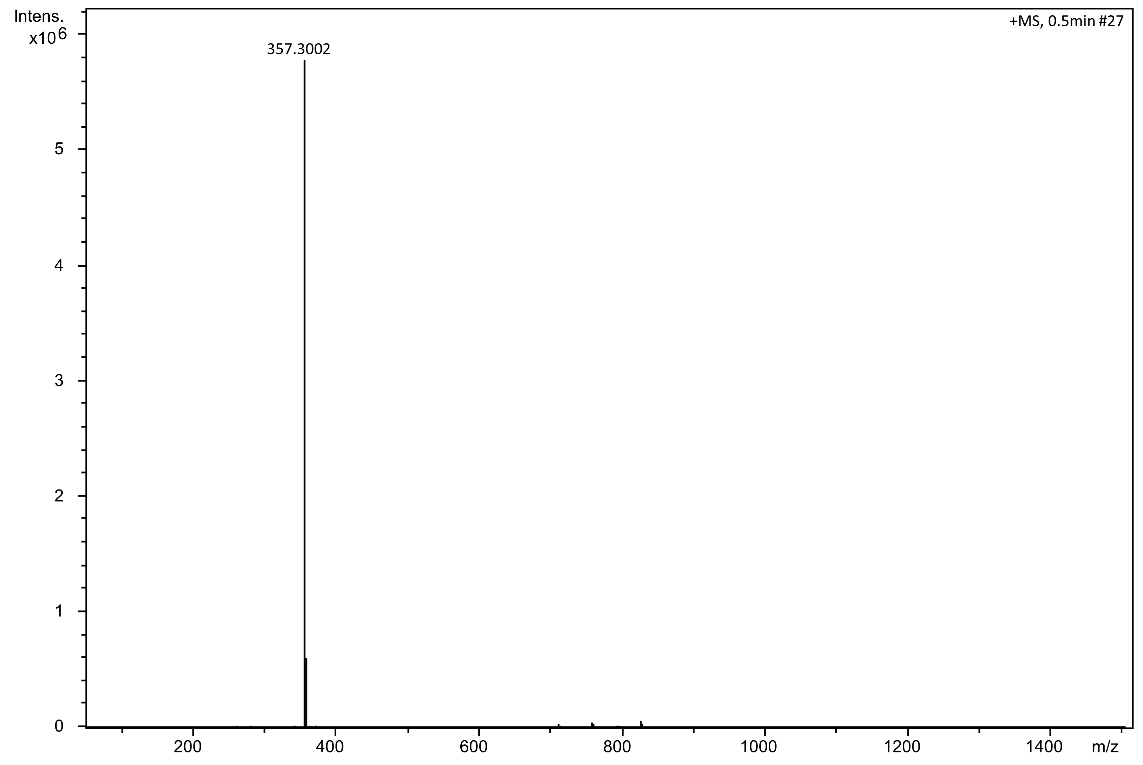
**

**Fig S9. HRMS** **spectrum of 5c**


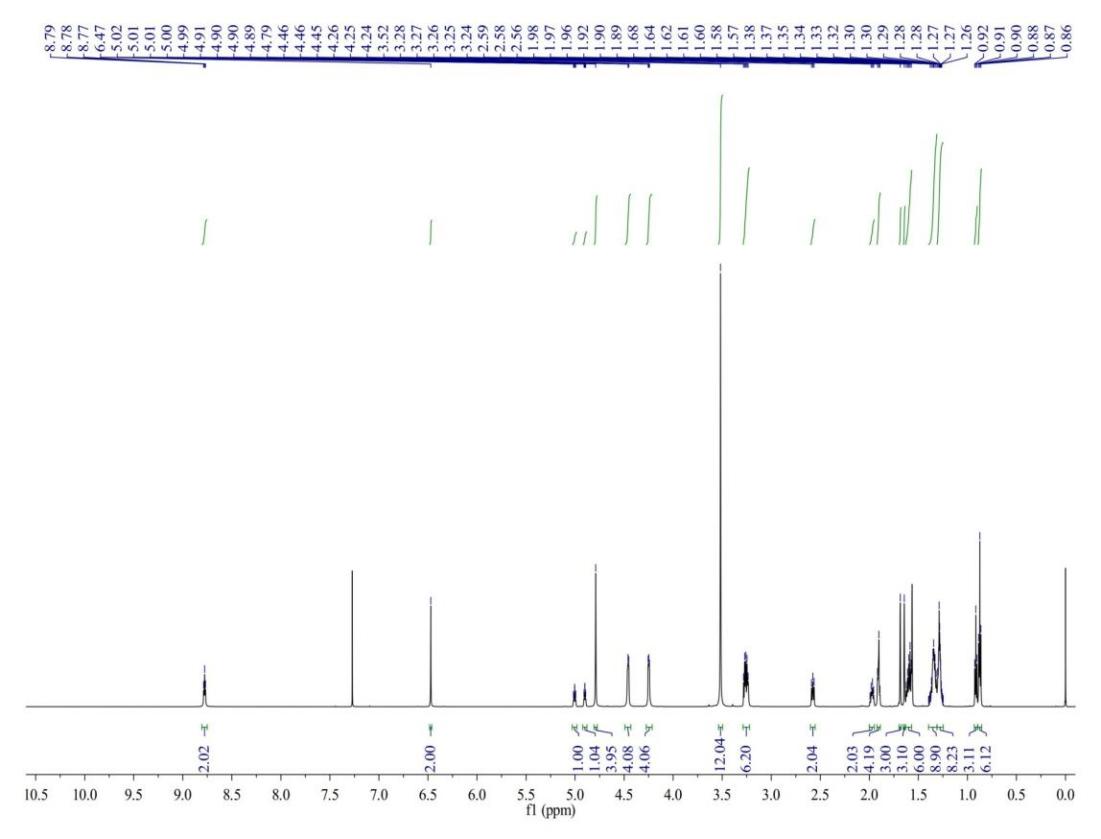


**Fig S10. 1H NMR spectrum of 5d**


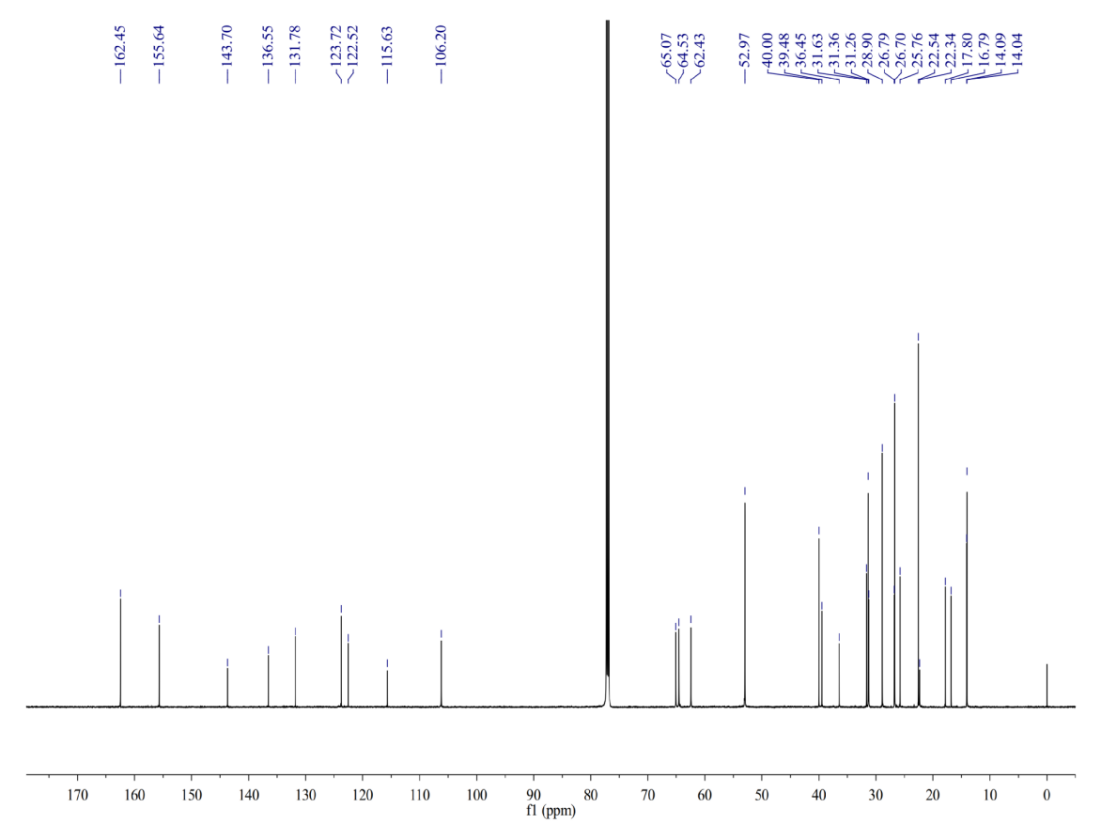


**Fig S11. 13C NMR spectrum of 5d**

**
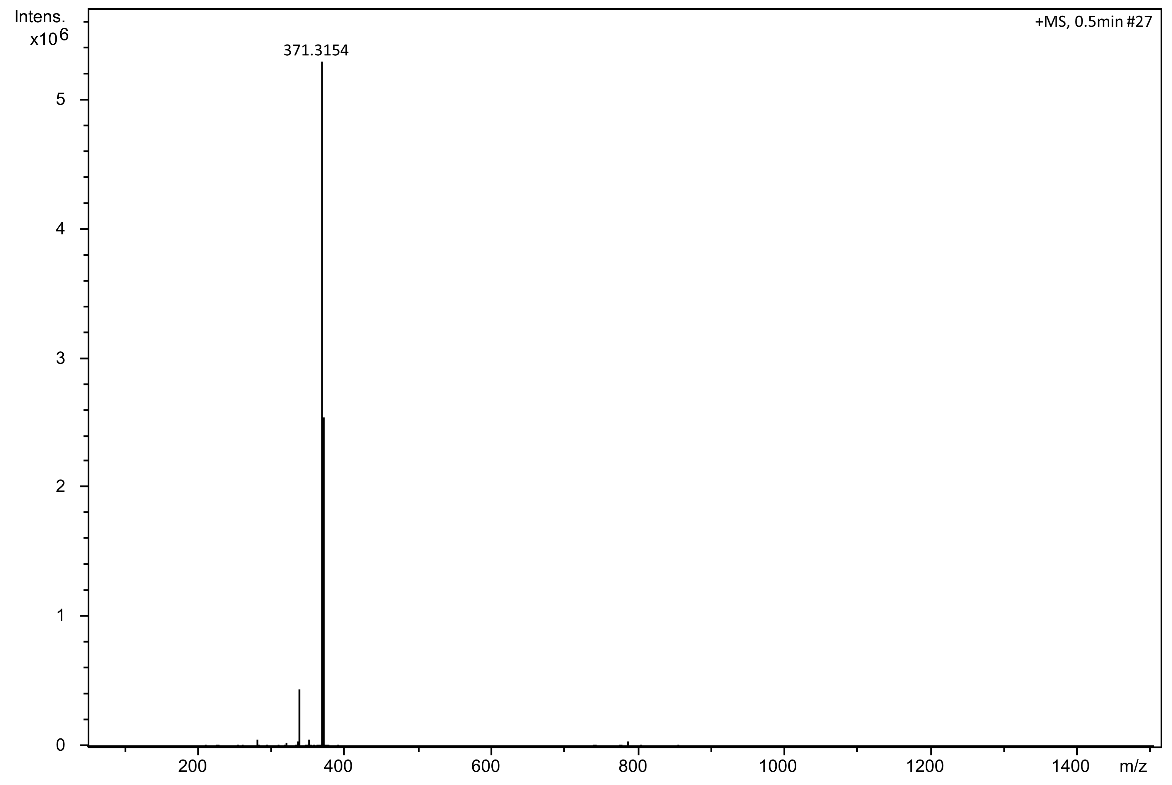
**

**Fig S12. HRMS spectrum of 5d**

**
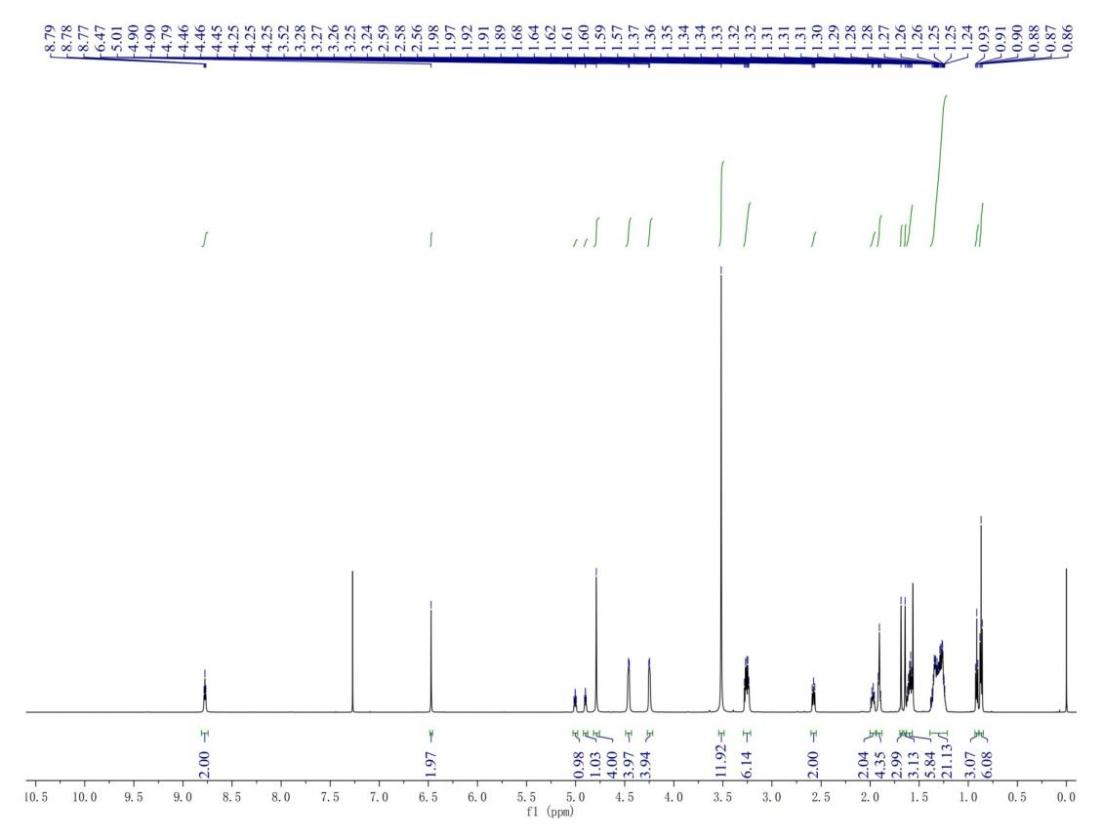
**

**Fig S13. 1H NMR spectrum of 5e**

**
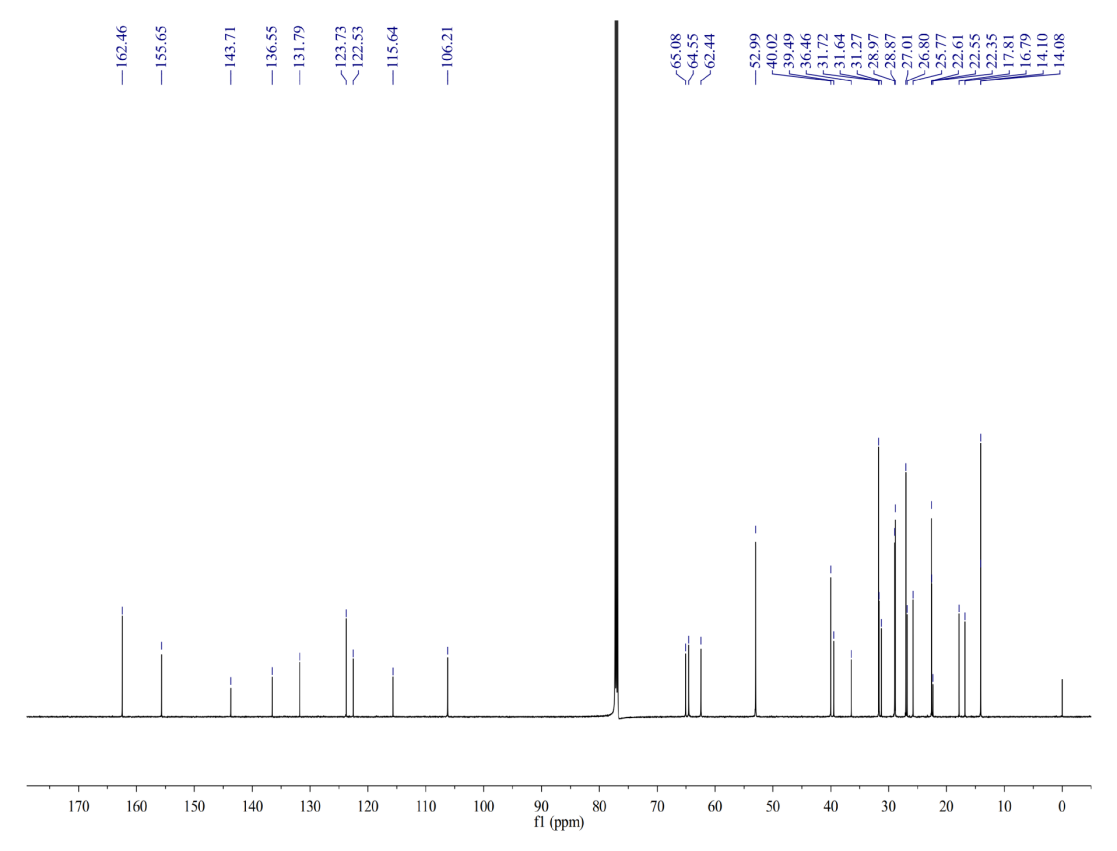
**

**Fig S14. 13C NMR spectrum of 5e**

**
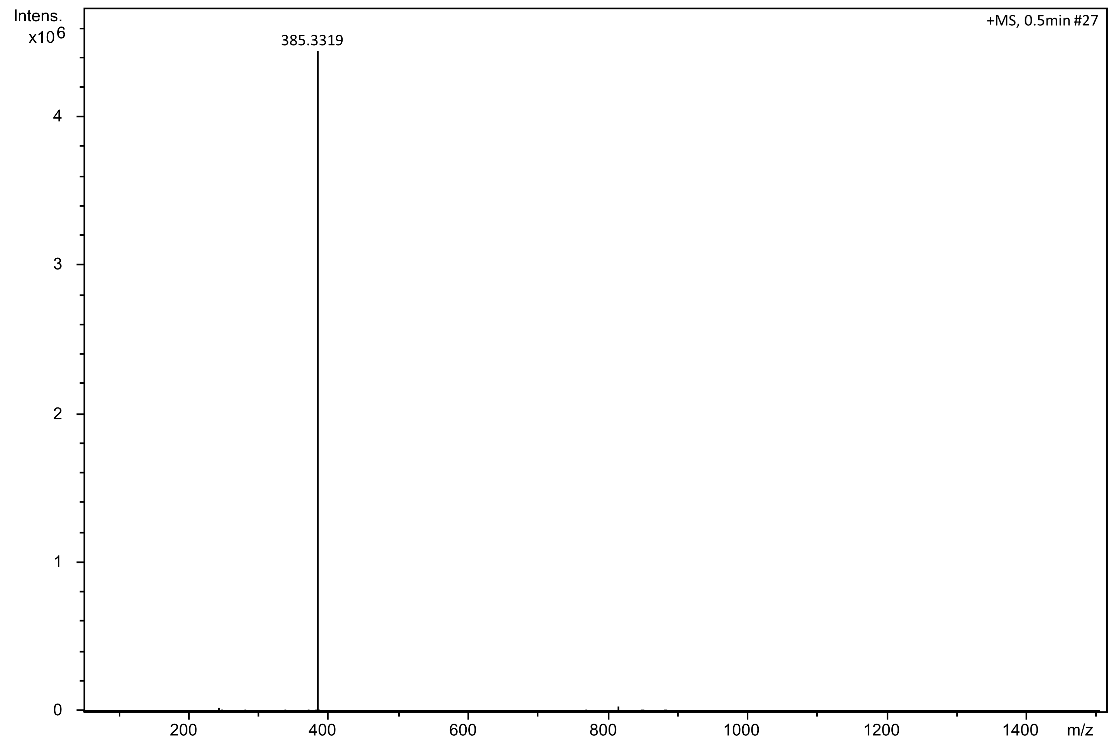
**

**Fig S15. HRMS spectrum of 5e**

**
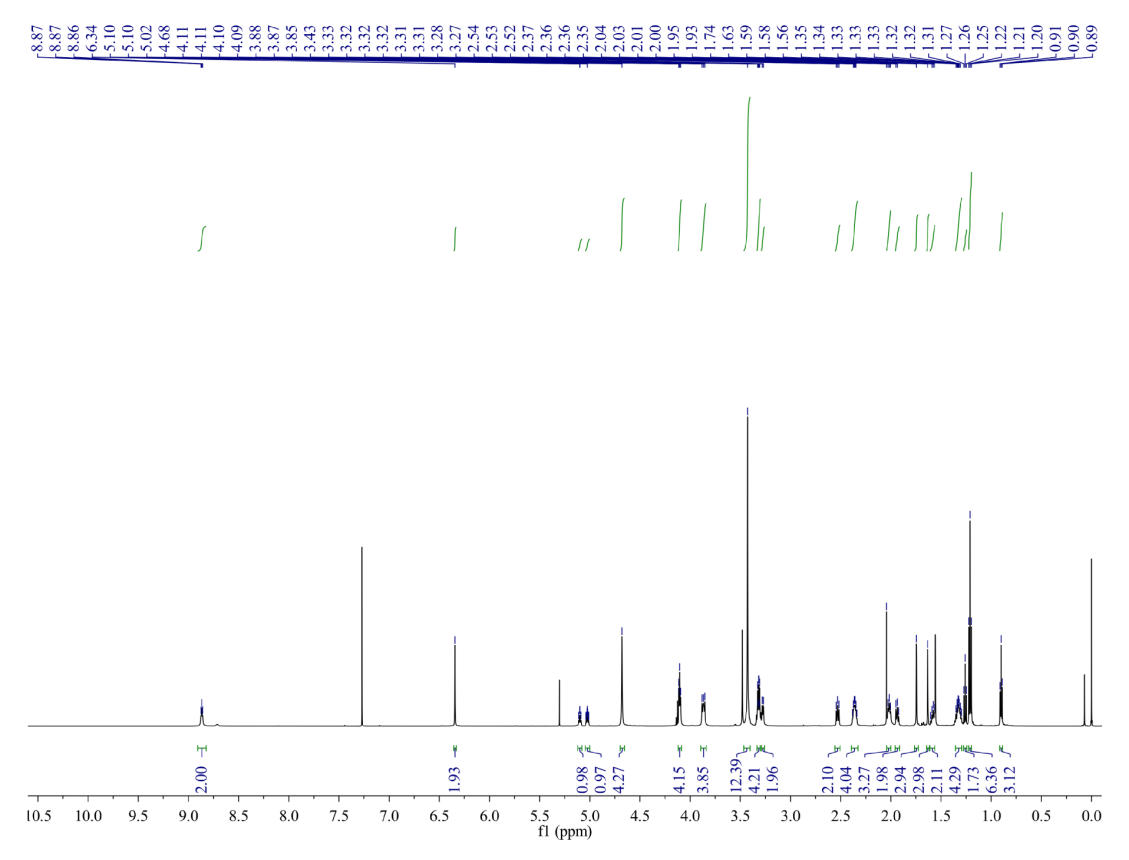
**

**Fig S16. 1H NMR spectrum of 5f**

**
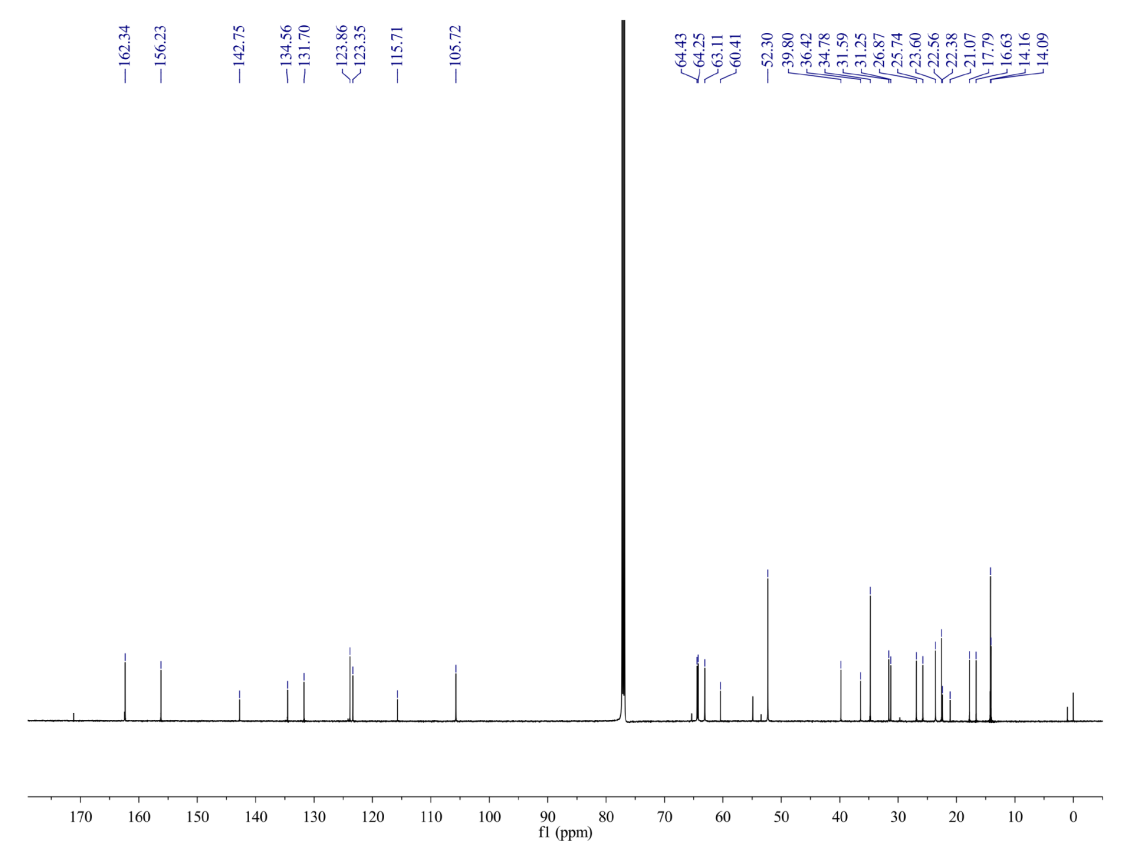
**

**Fig S17. 13C NMR spectrum of 5f**

**
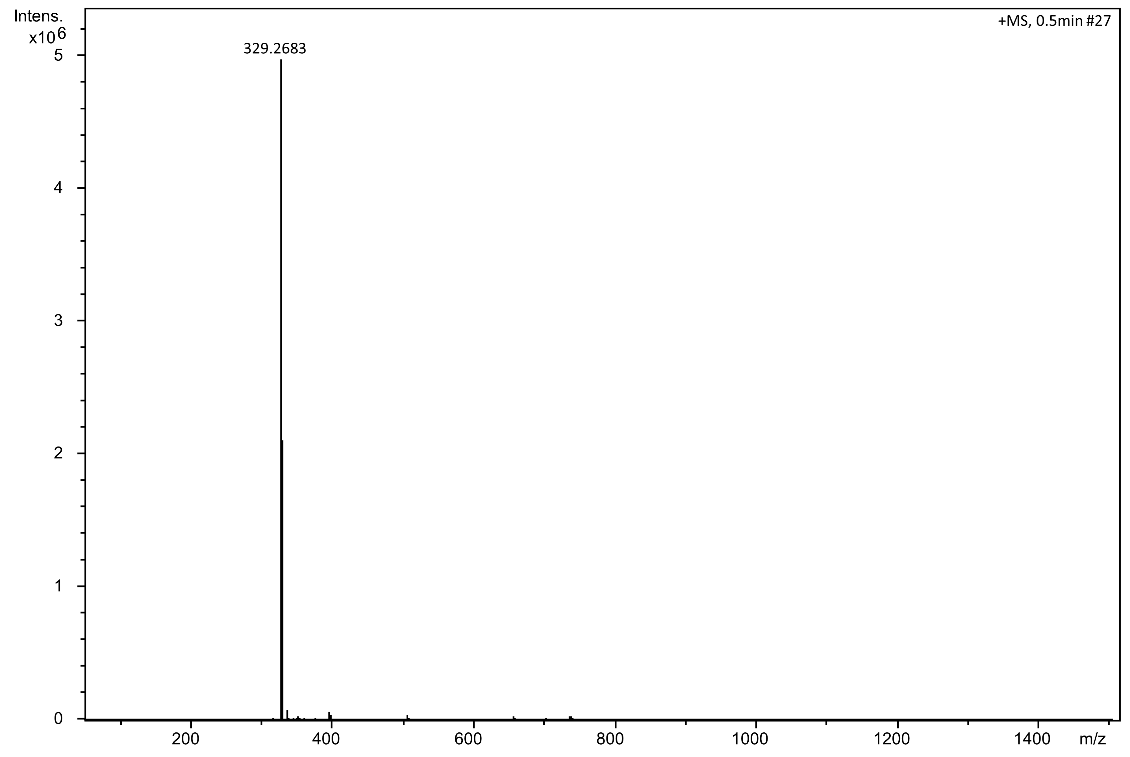
**

**Fig S18. HRMS spectrum of 5f**

**
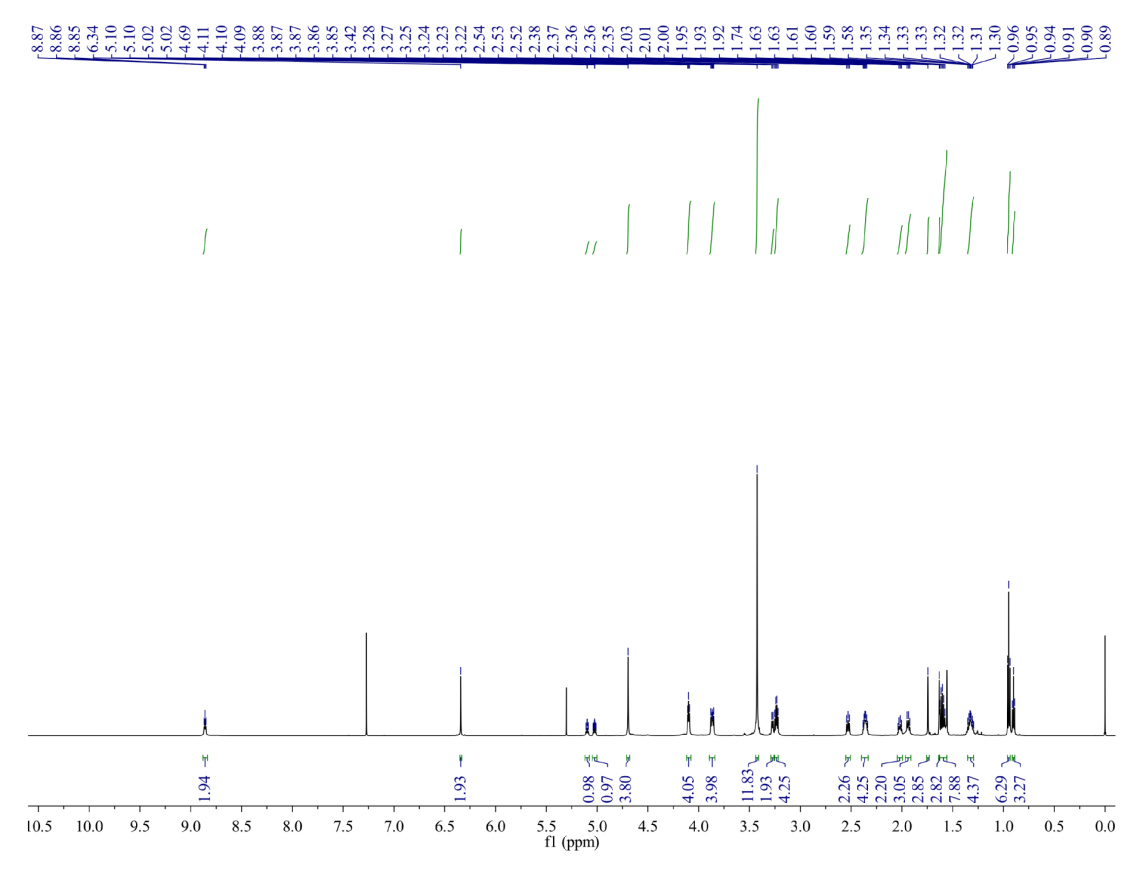
**

**Fig S19. 1H NMR spectrum of 5g**

**
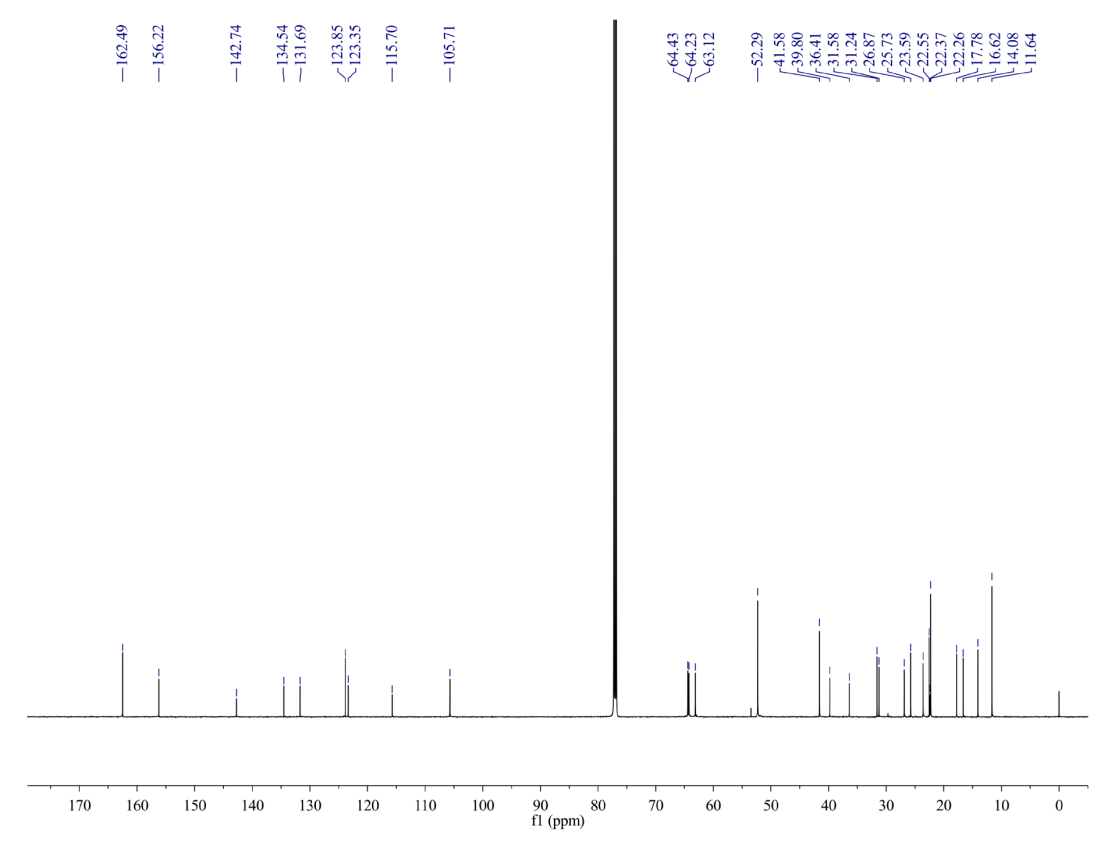
**

**Fig S20. 13C NMR spectrum of 5g**

**
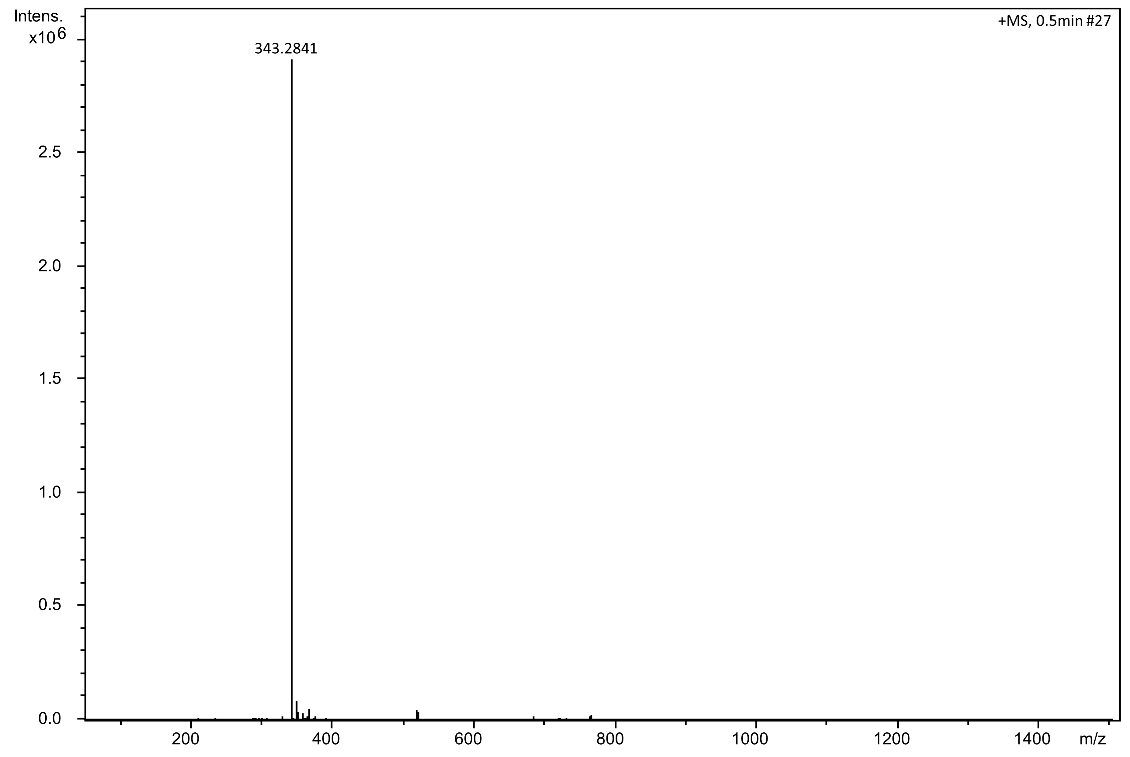
**

**Fig S21. HRMS spectrum of 5g**

**
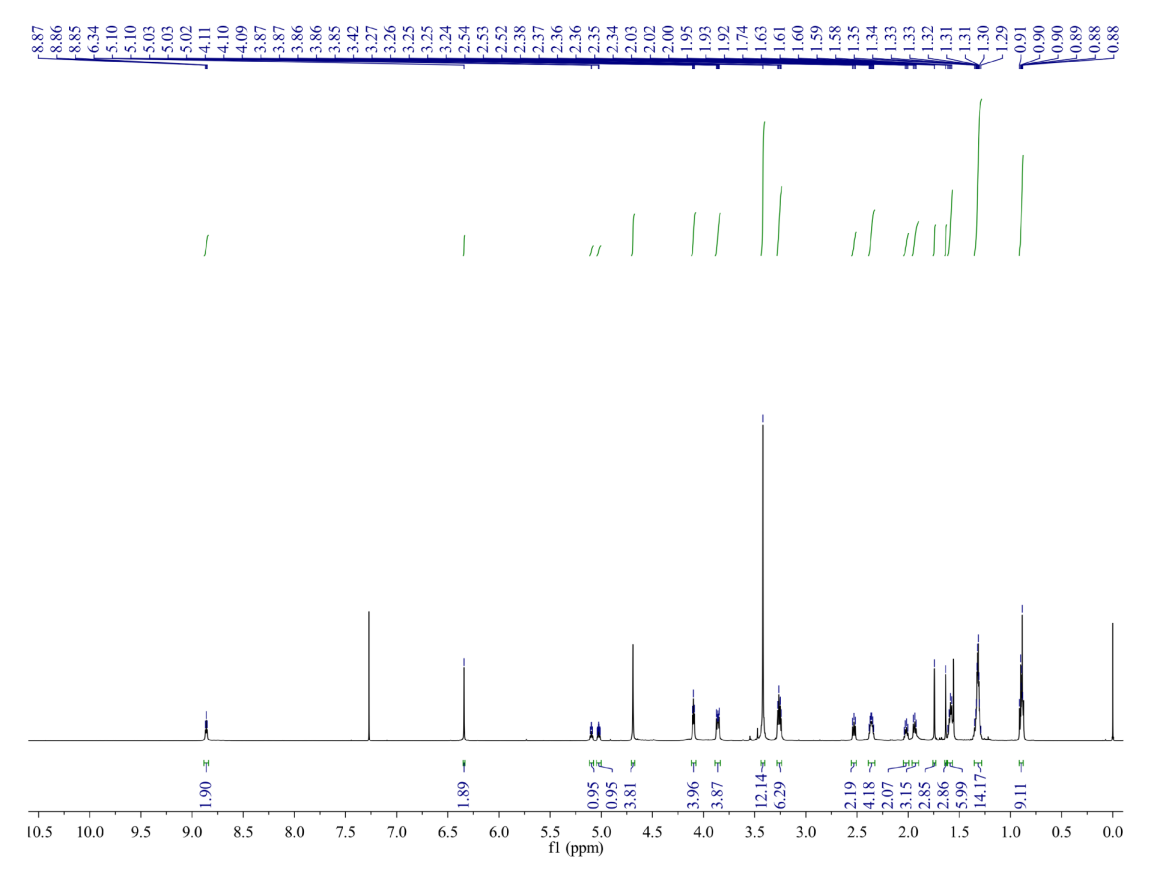
**

**Fig S22. 1H NMR spectrum of 5h**

**
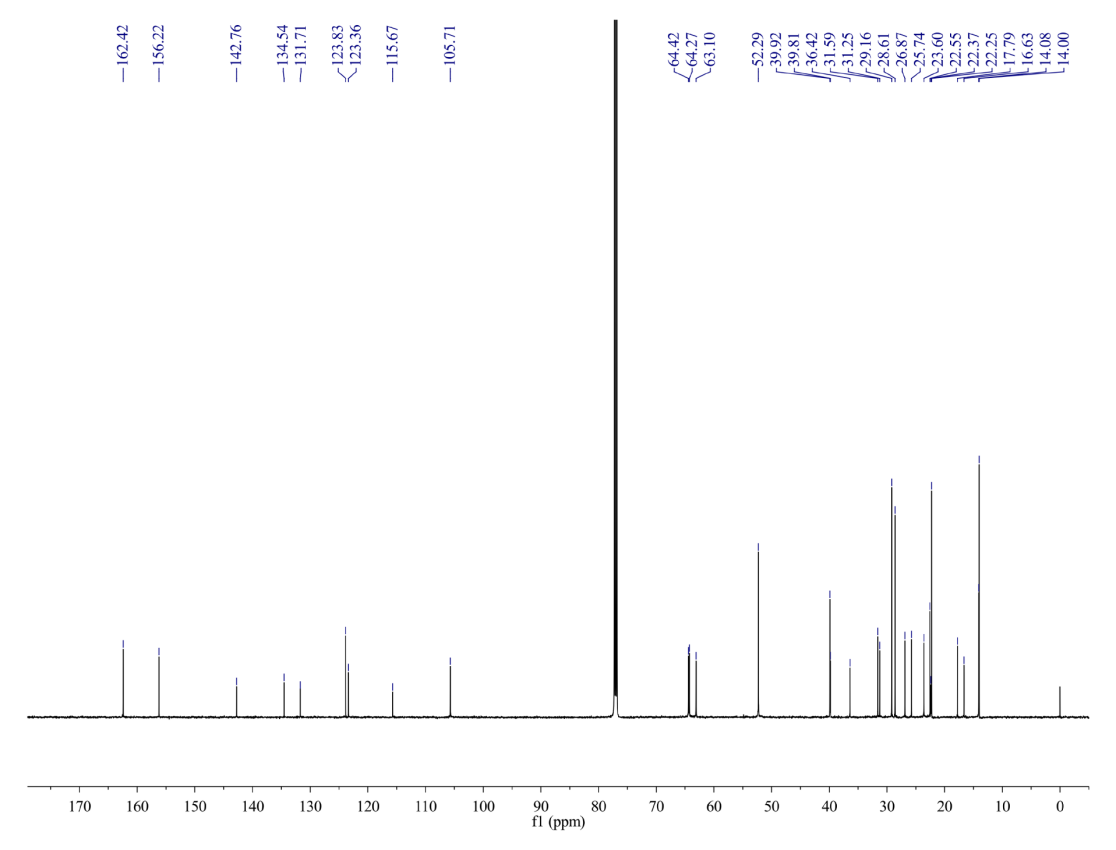
**

**Fig S23. 13C NMR spectrum of 5h**

**
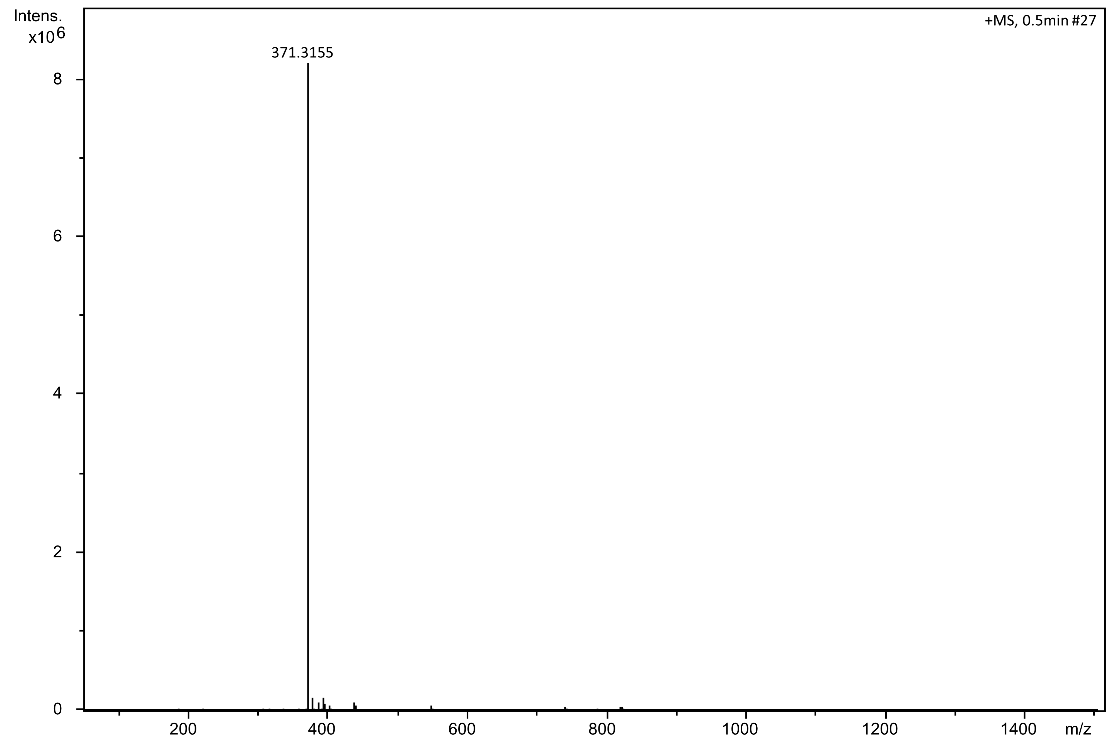
**

**Fig S24. HRMS spectrum of 5h**

**
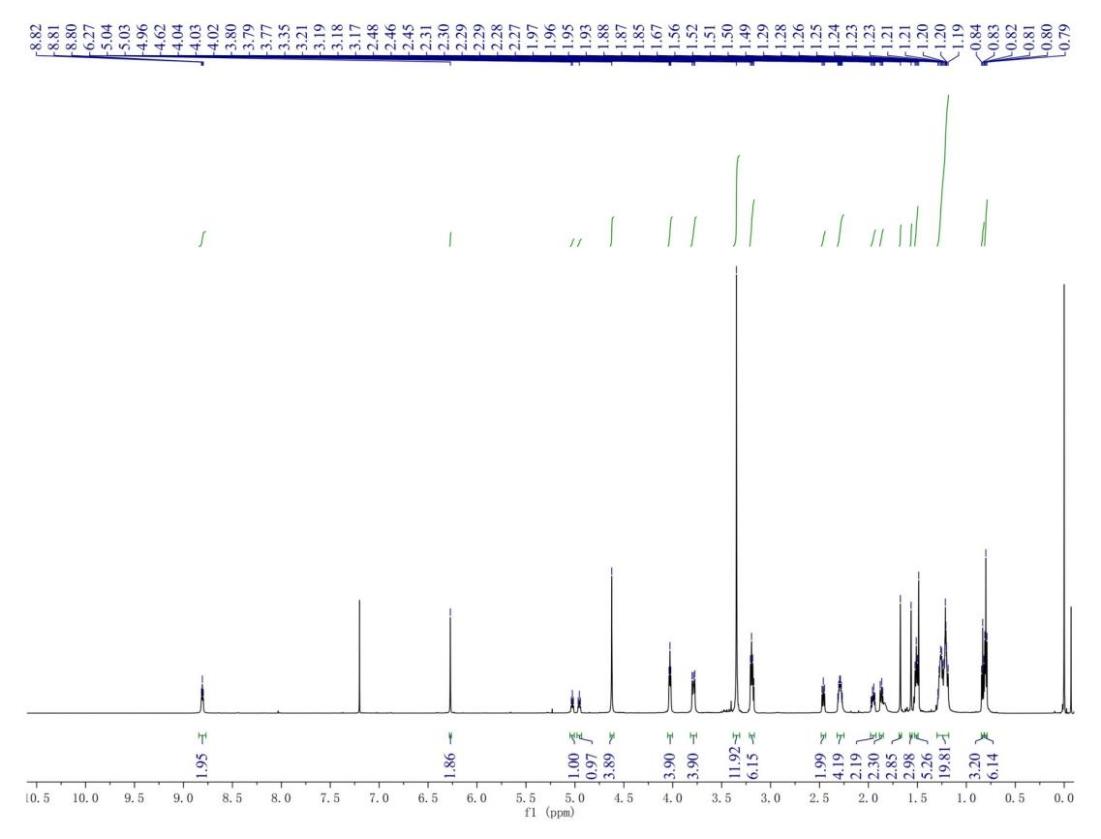
**

**Fig S25. 1H NMR spectrum of 5i**

**
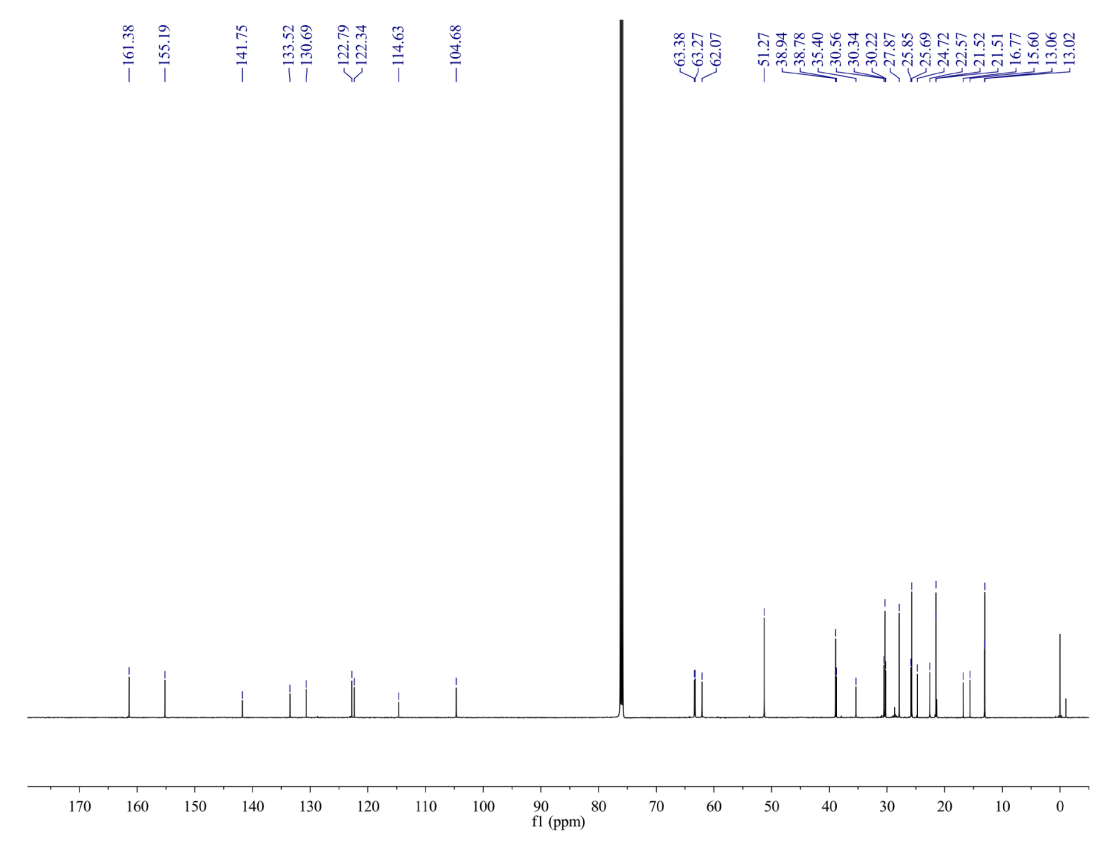
**

**Fig S26. 13C NMR spectrum of 5i**

**
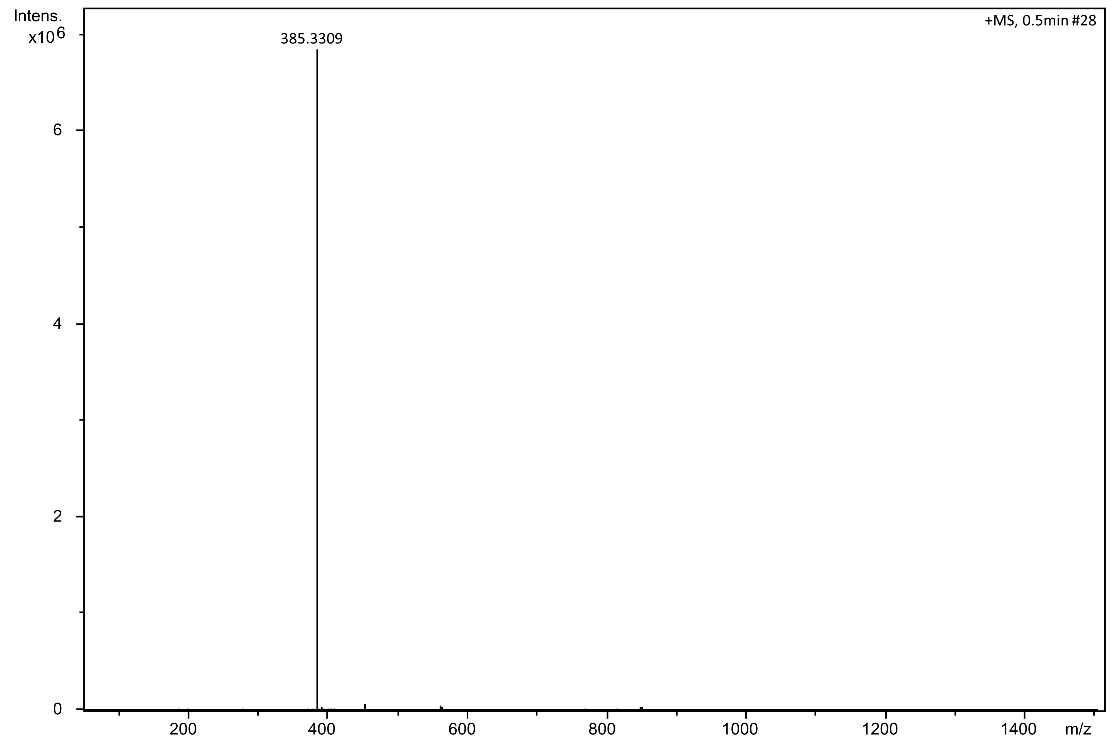
**

**Fig S27. HRMS spectrum of 5i**

**
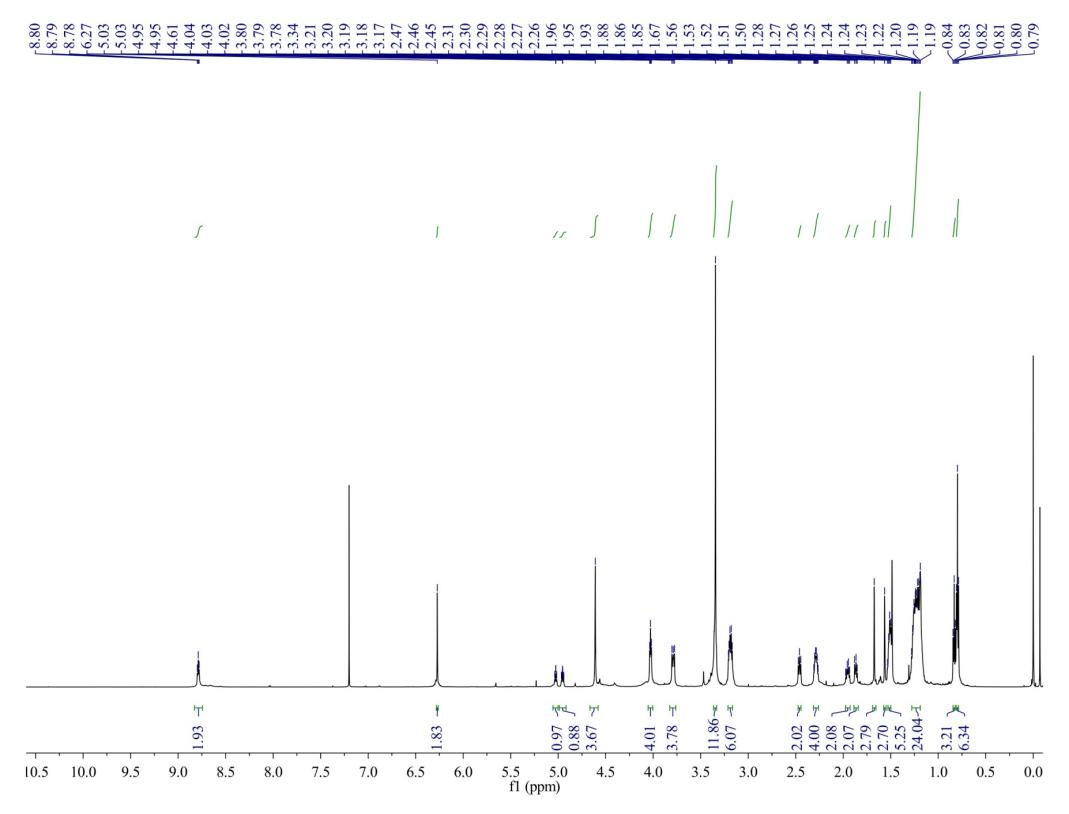
**

**Fig S28. 1H NMR spectrum of 5j**

**
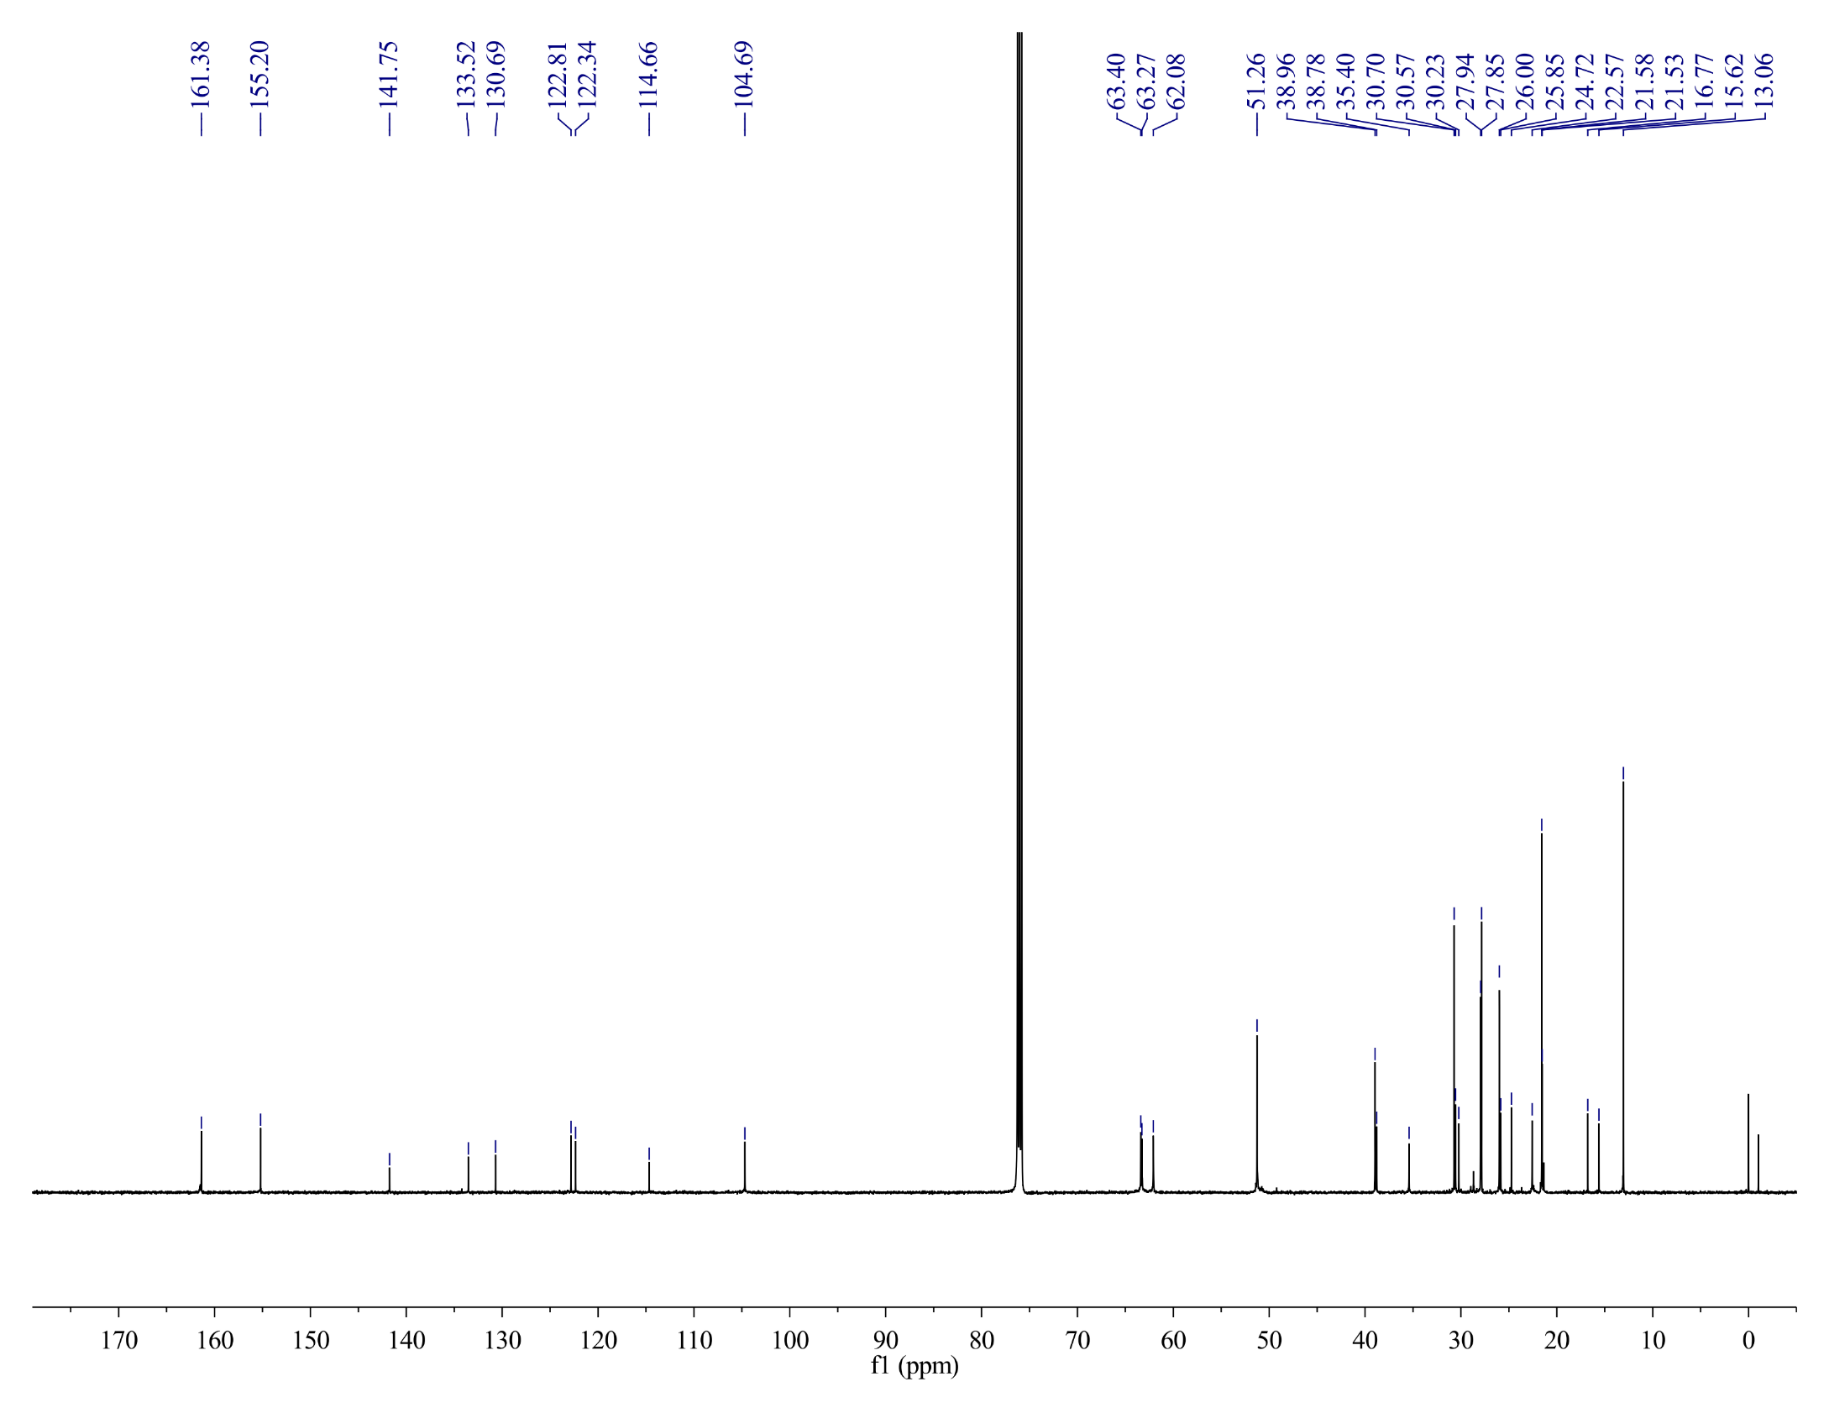
**

**Fig S29. 13C NMR spectrum of 5j**

**
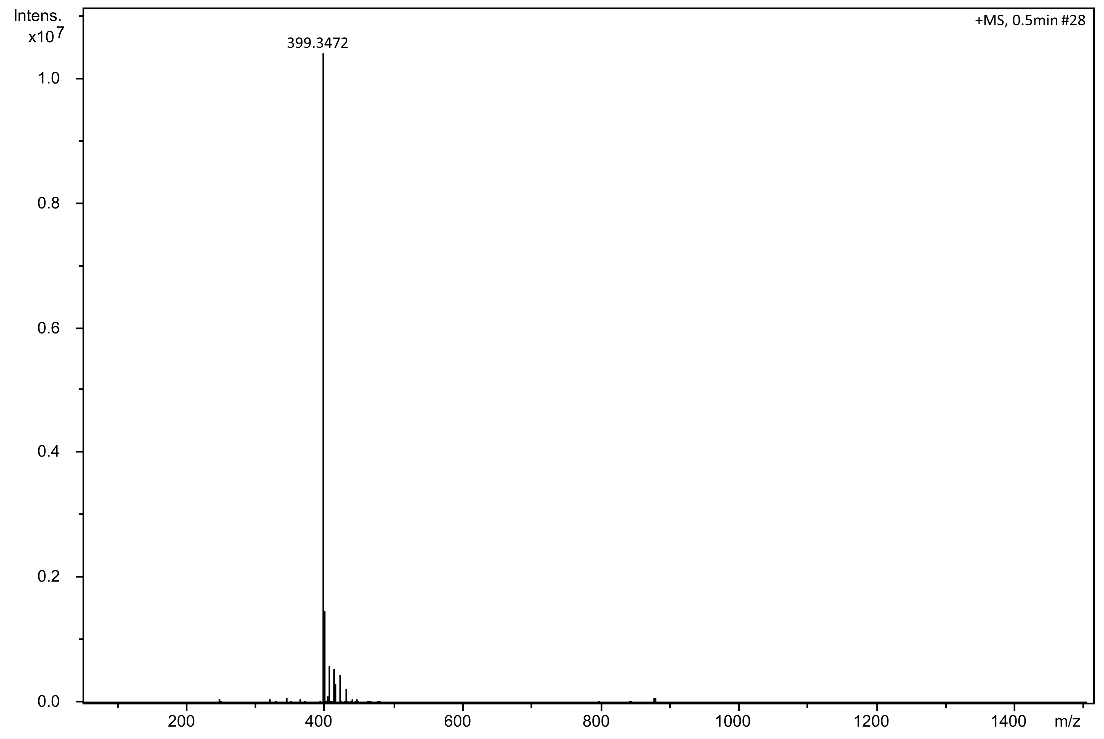
**

**Fig S30. HRMS spectrum of 5j**

**
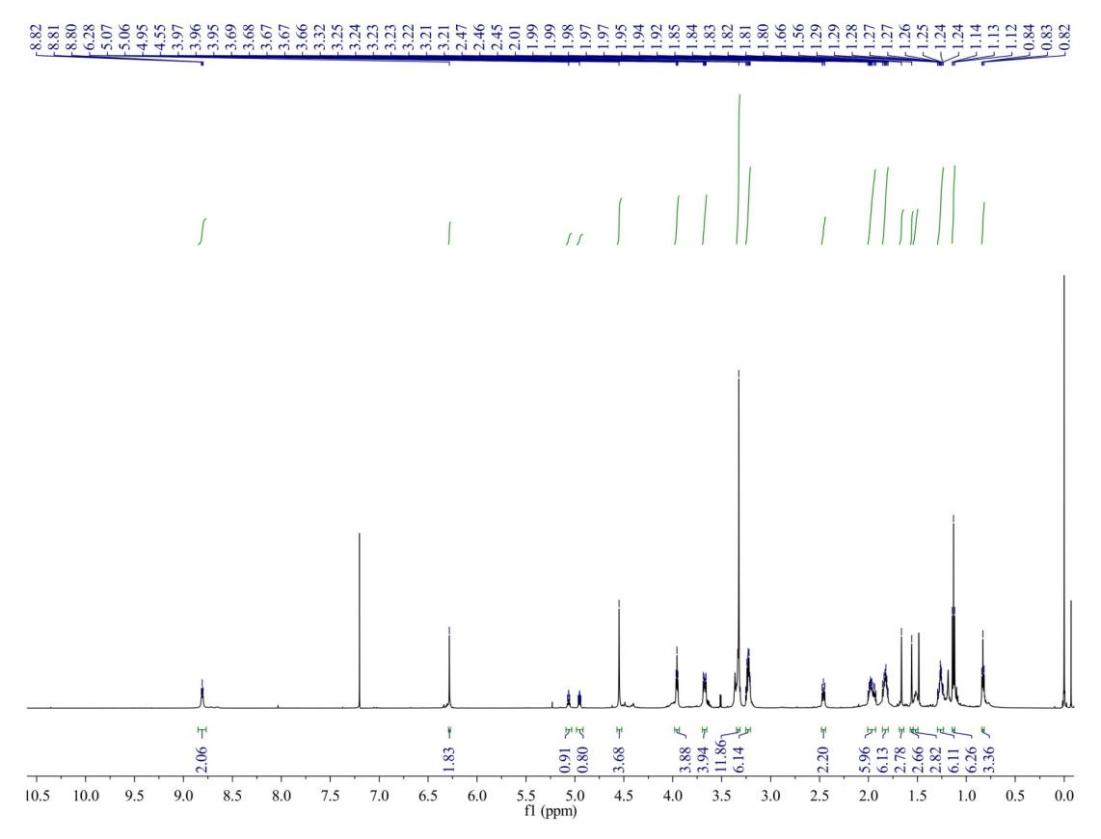
**

**Fig S31. 1H NMR spectrum of 5k**

**
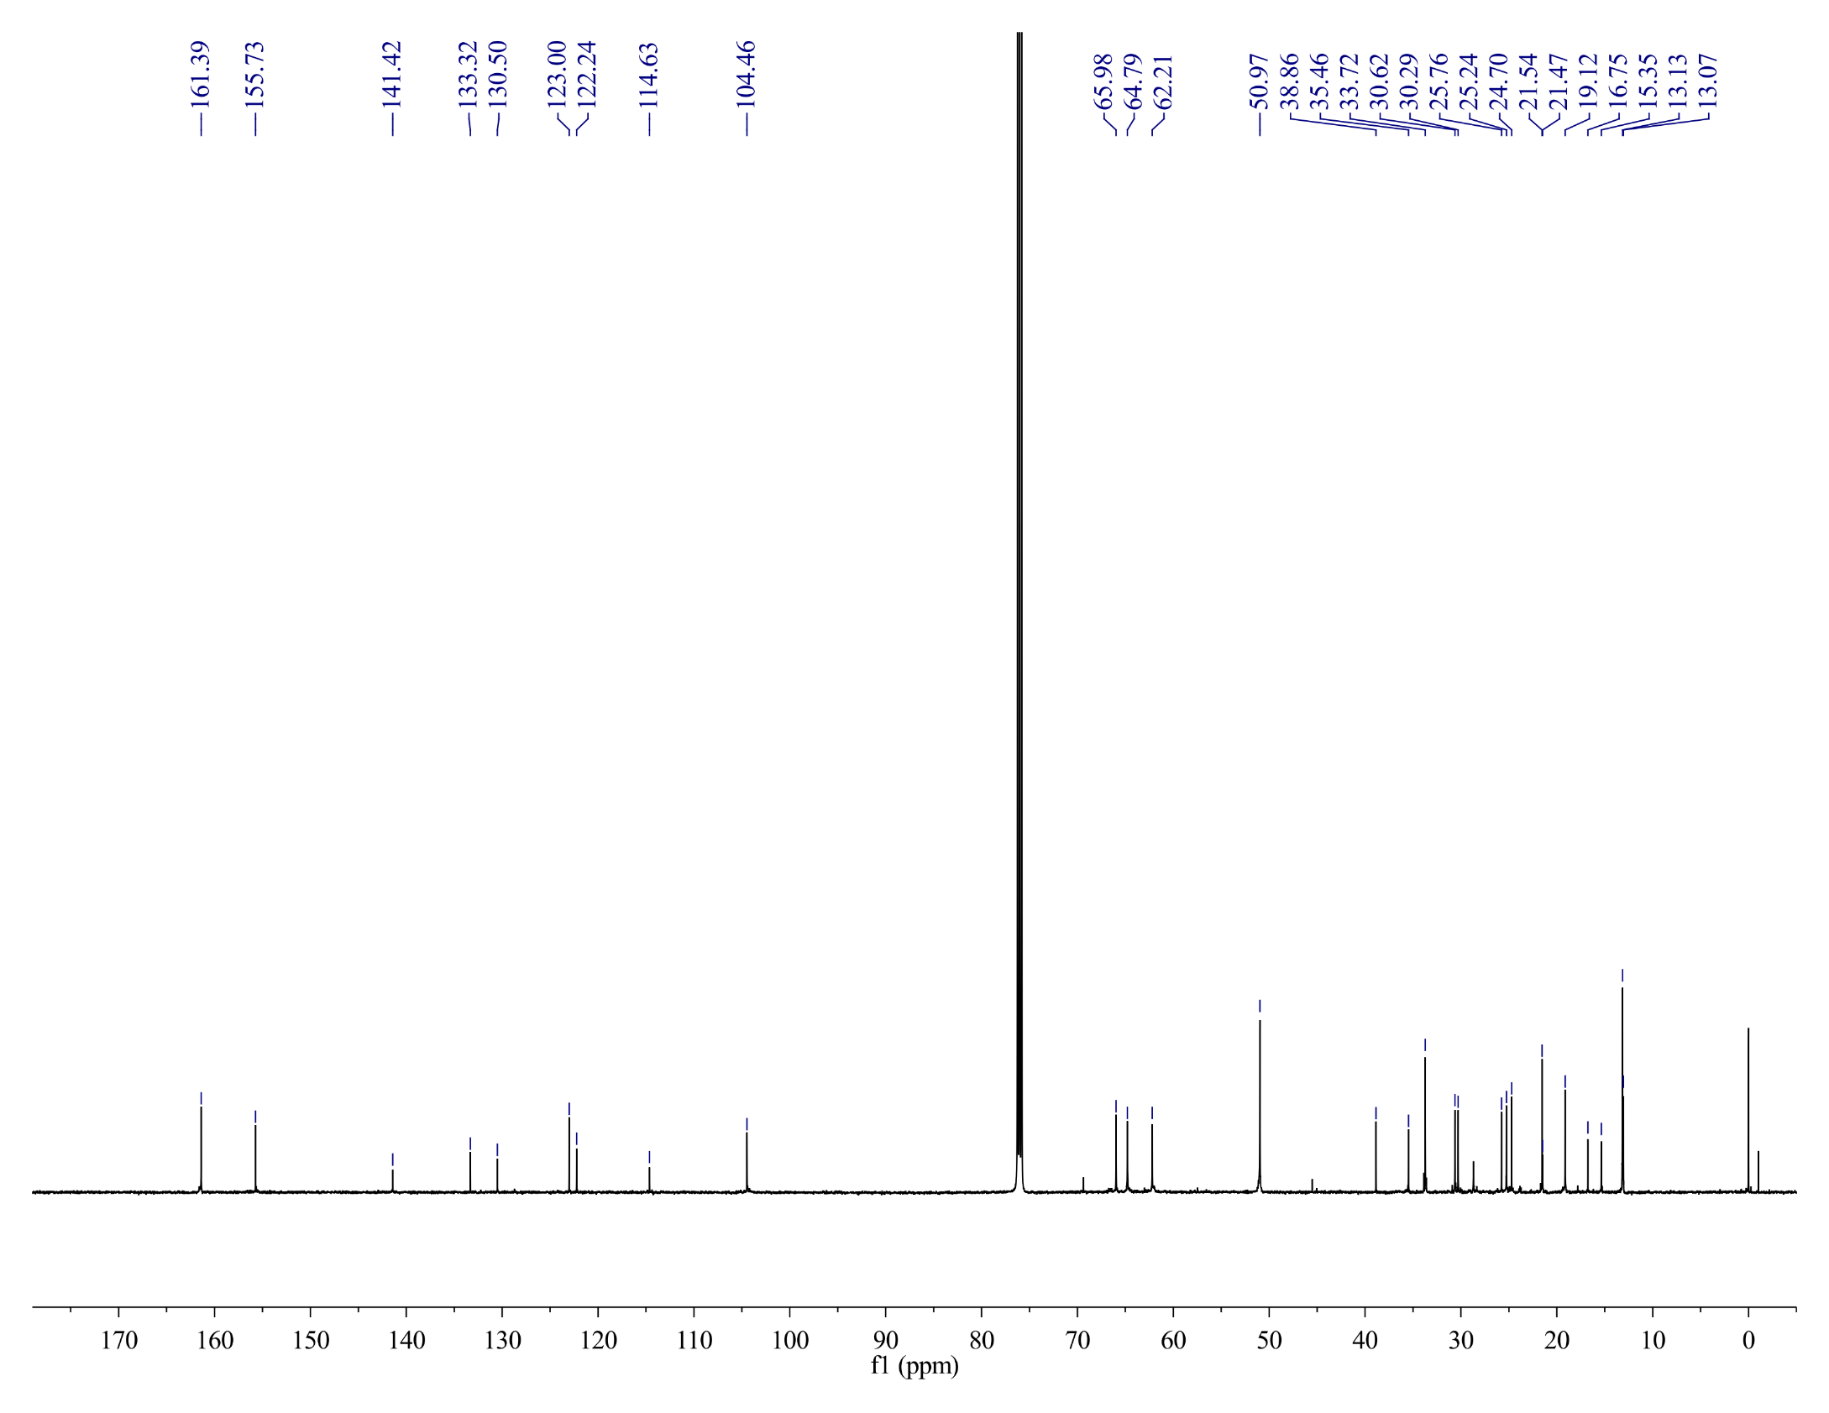
**

**Fig S32. 13C NMR spectrum of 5k**

**
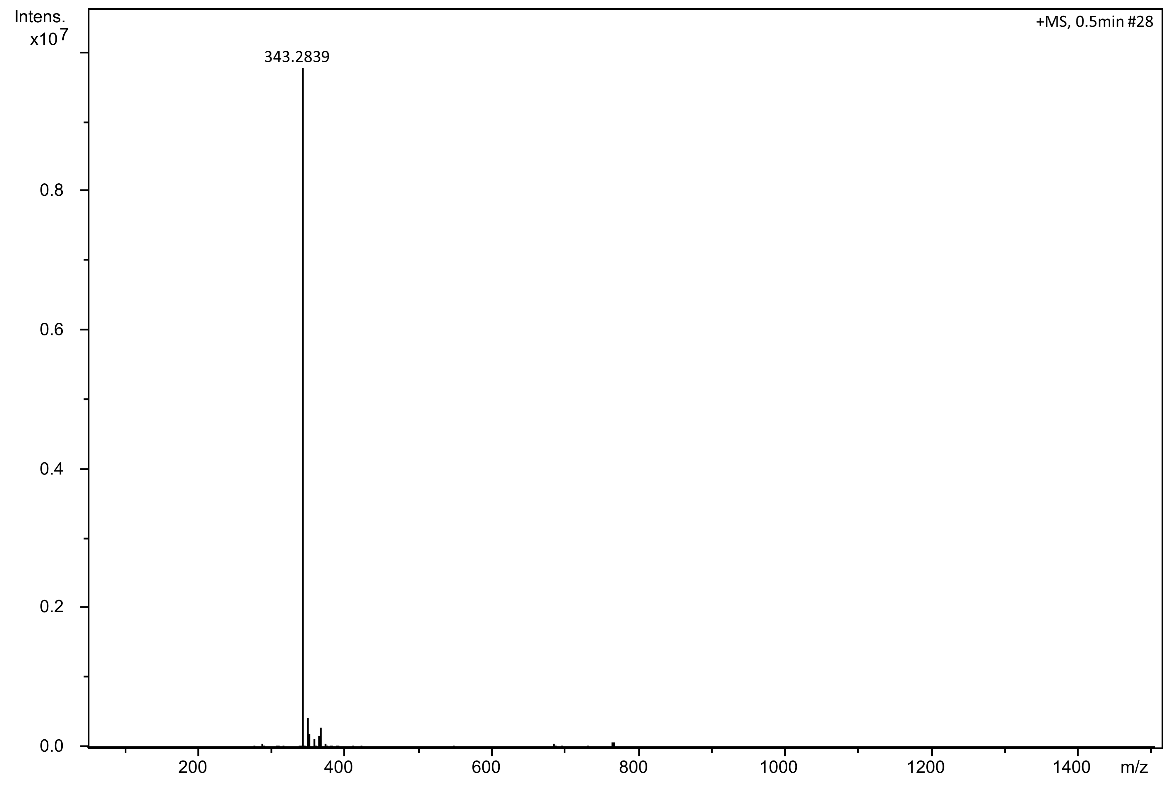
**

**Fig S33. HRMS spectrum of 5k**

**
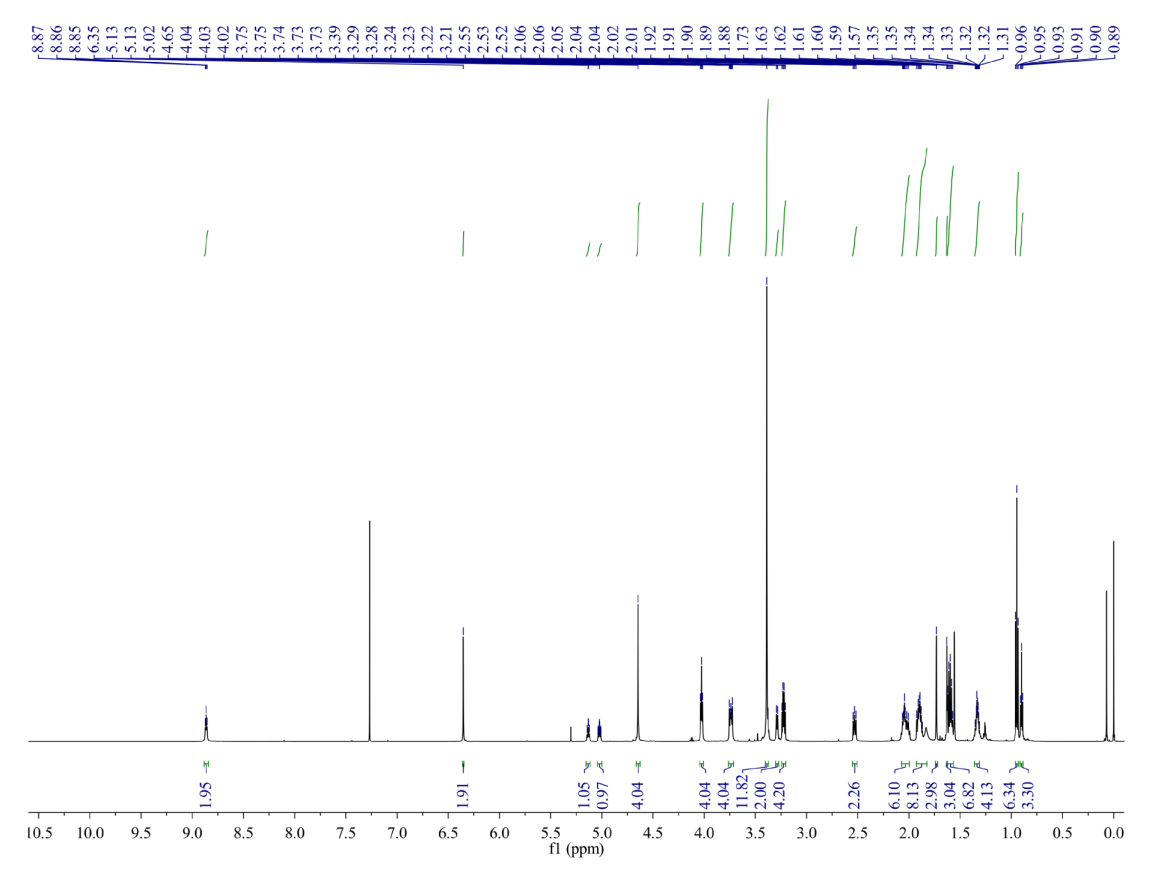
**

**Fig S34. 1H NMR spectrum of 5l**

**
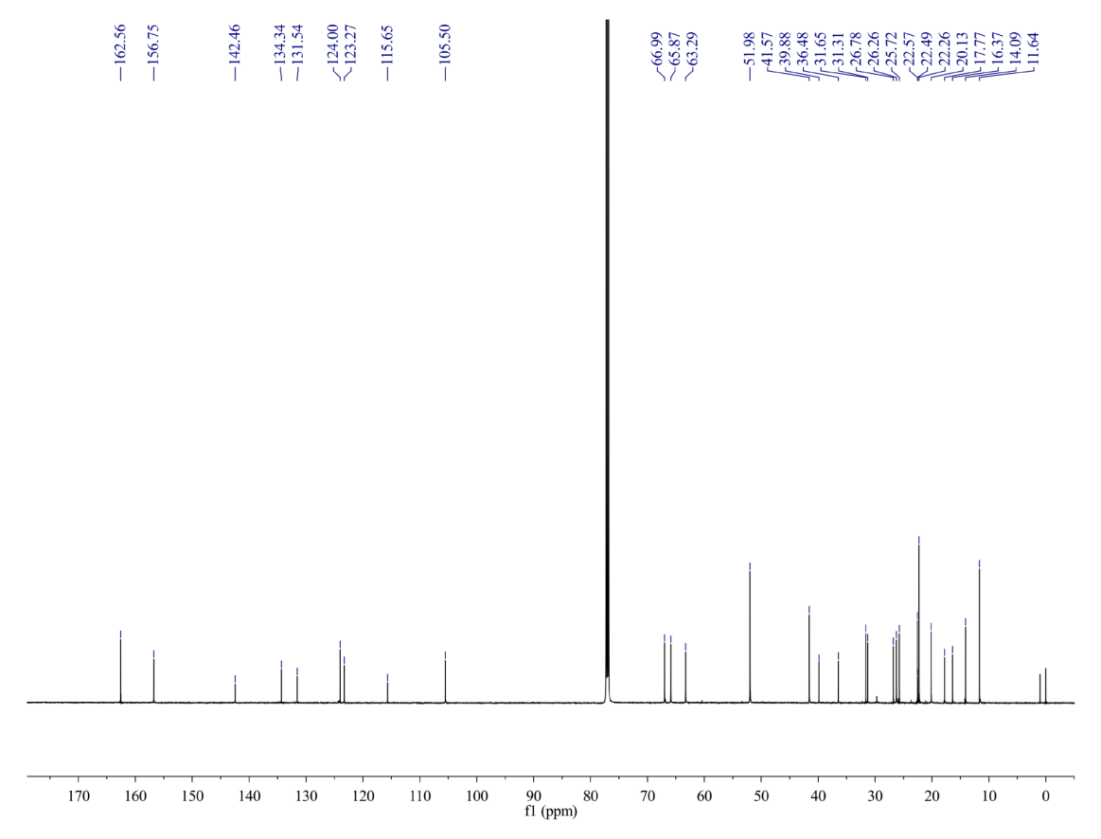
**

**Fig S35. 13C NMR spectrum of 5l**

**
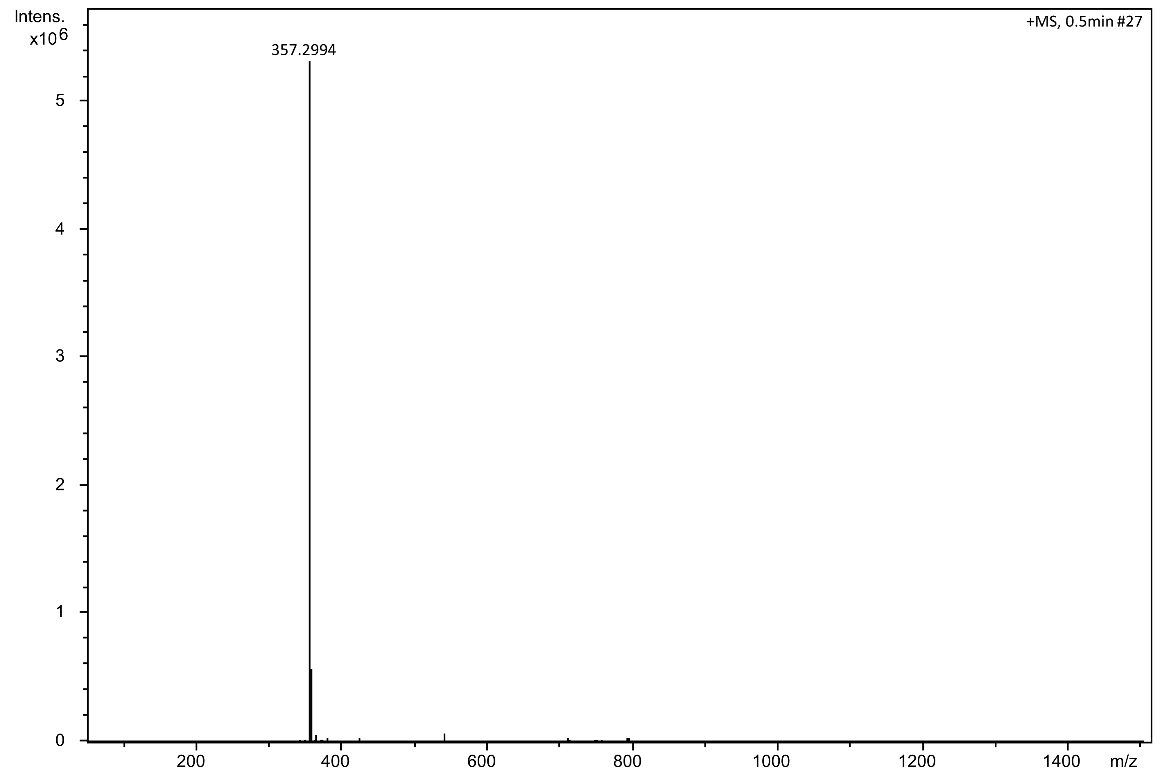
**

**Fig S36. HRMS spectrum of 5l**

**
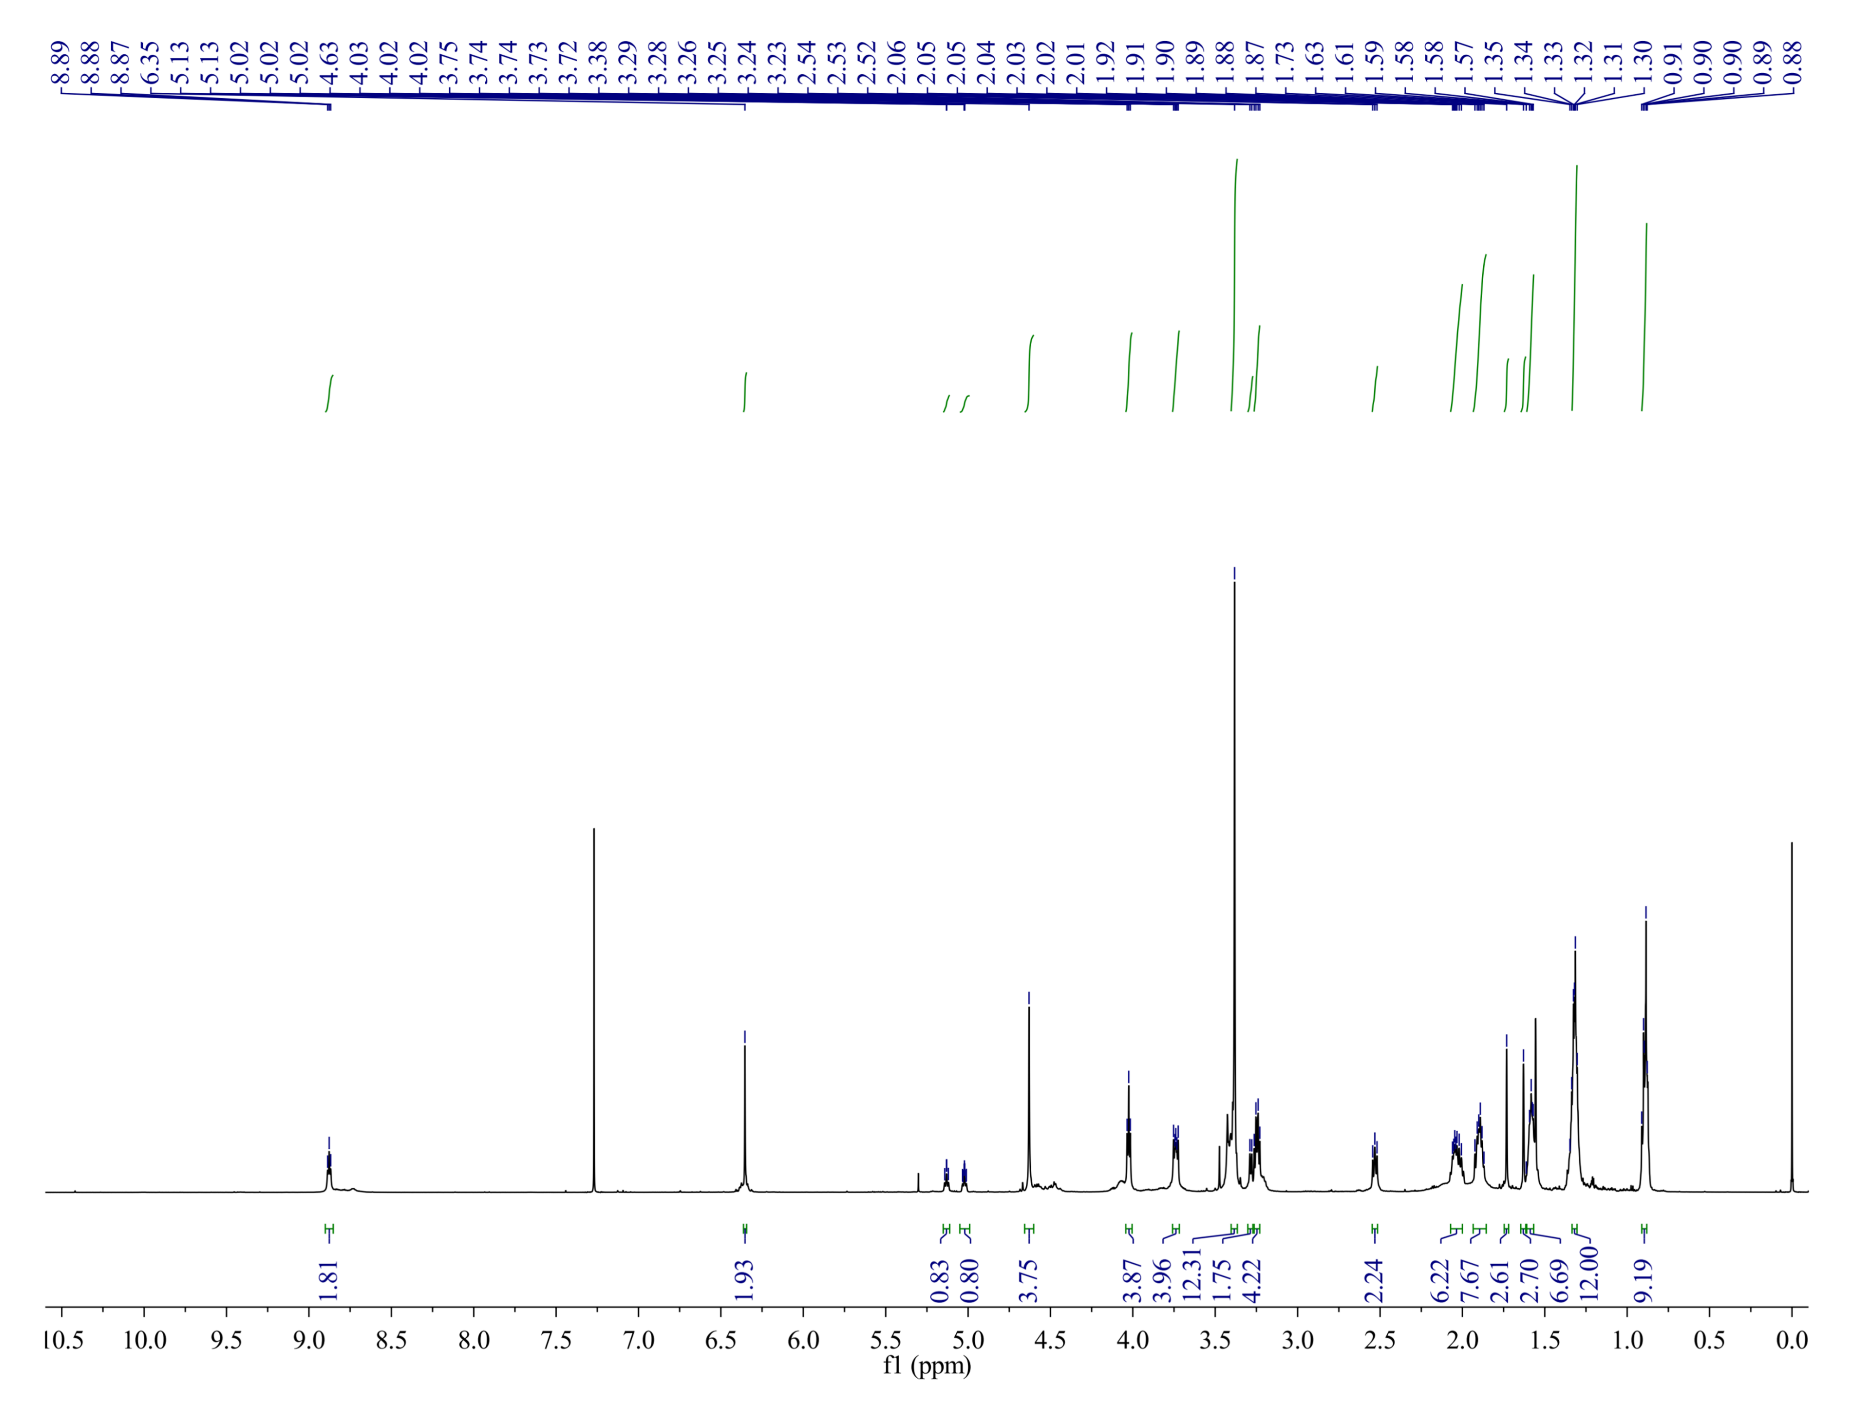
**

**Fig S37. 1H NMR spectrum of 5m**

**
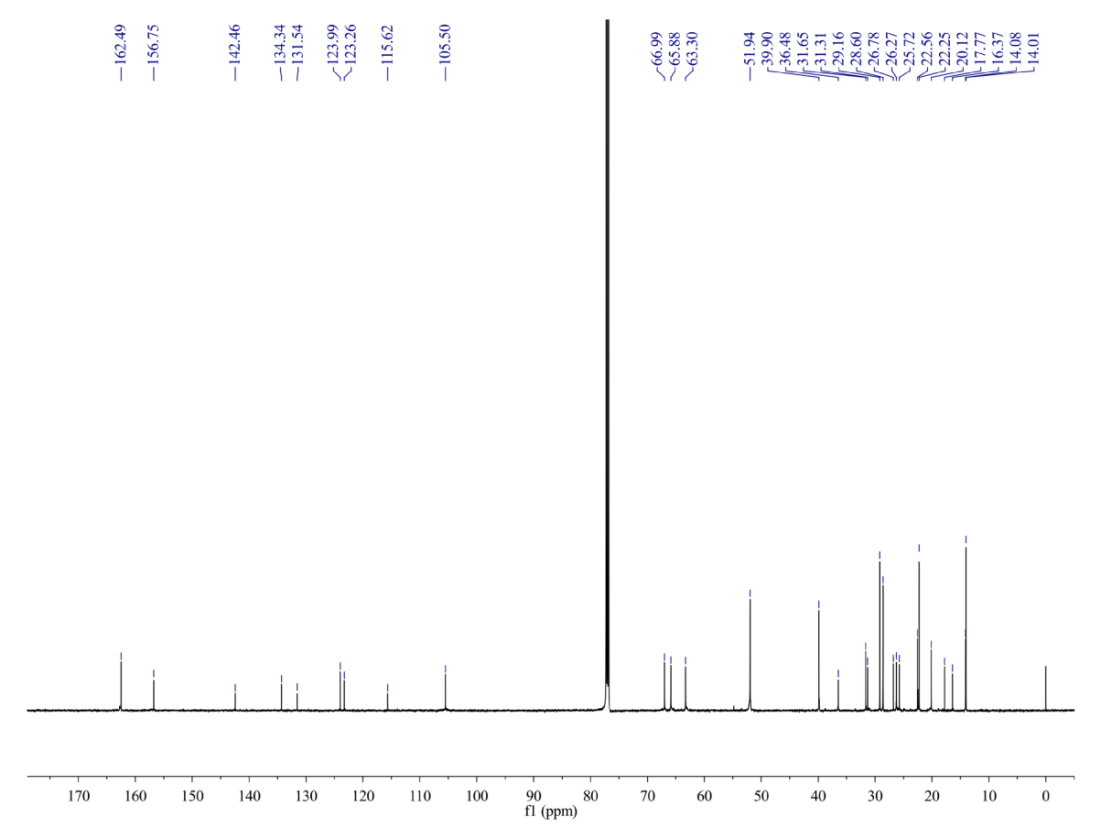
**

**Fig S38. 13C NMR spectrum of 5m**

**
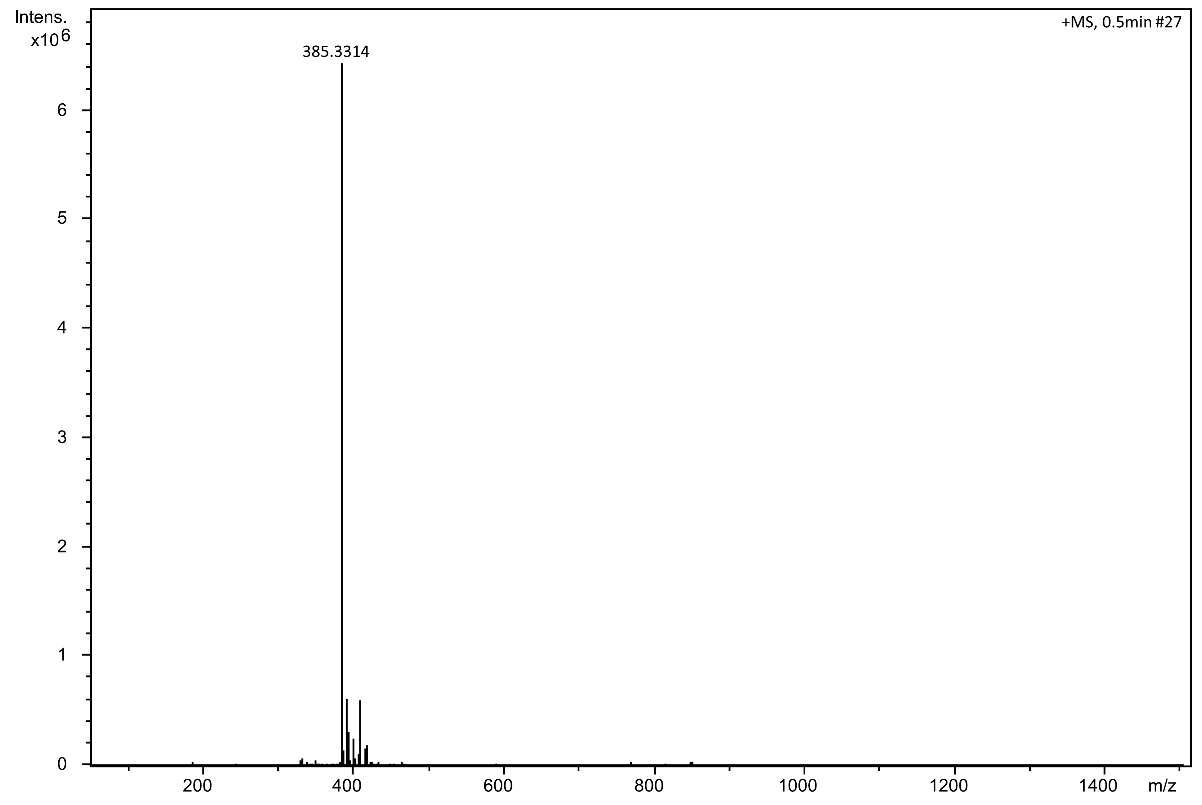
**

**Fig S39. HRMS spectrum of 5m**

**
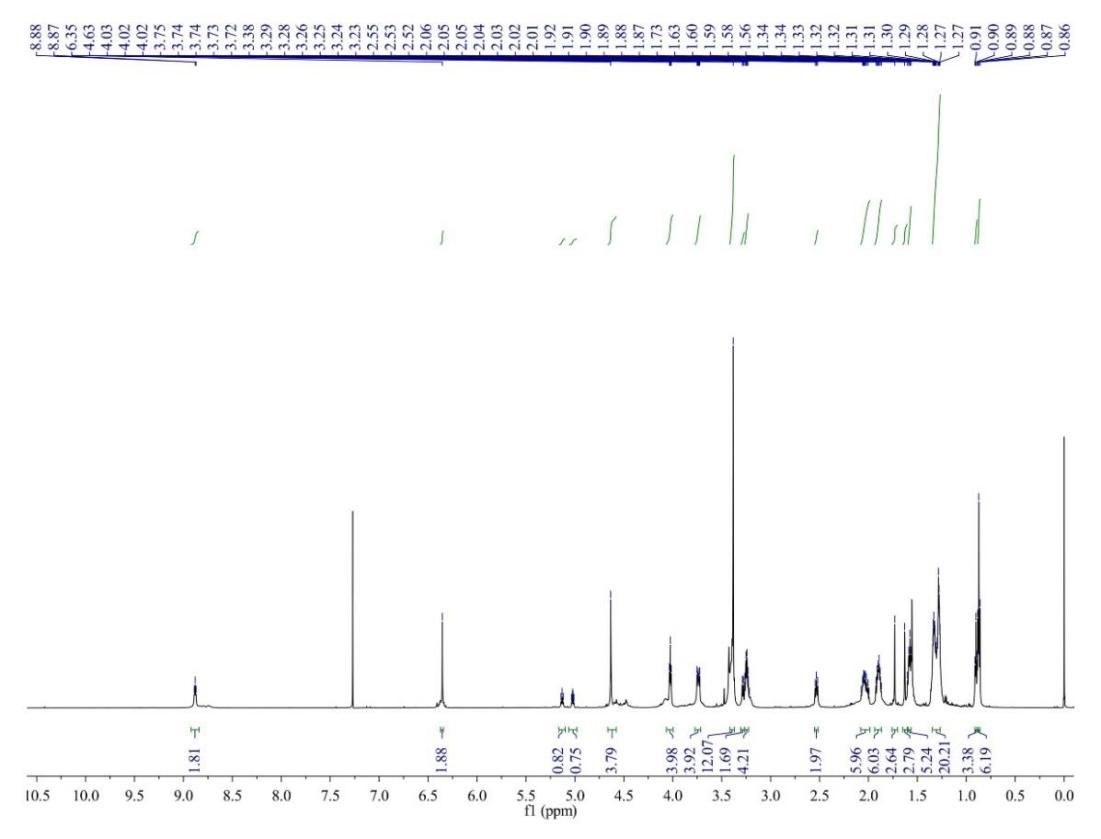
**

**Fig S40. 1H NMR spectrum of 5n**

**
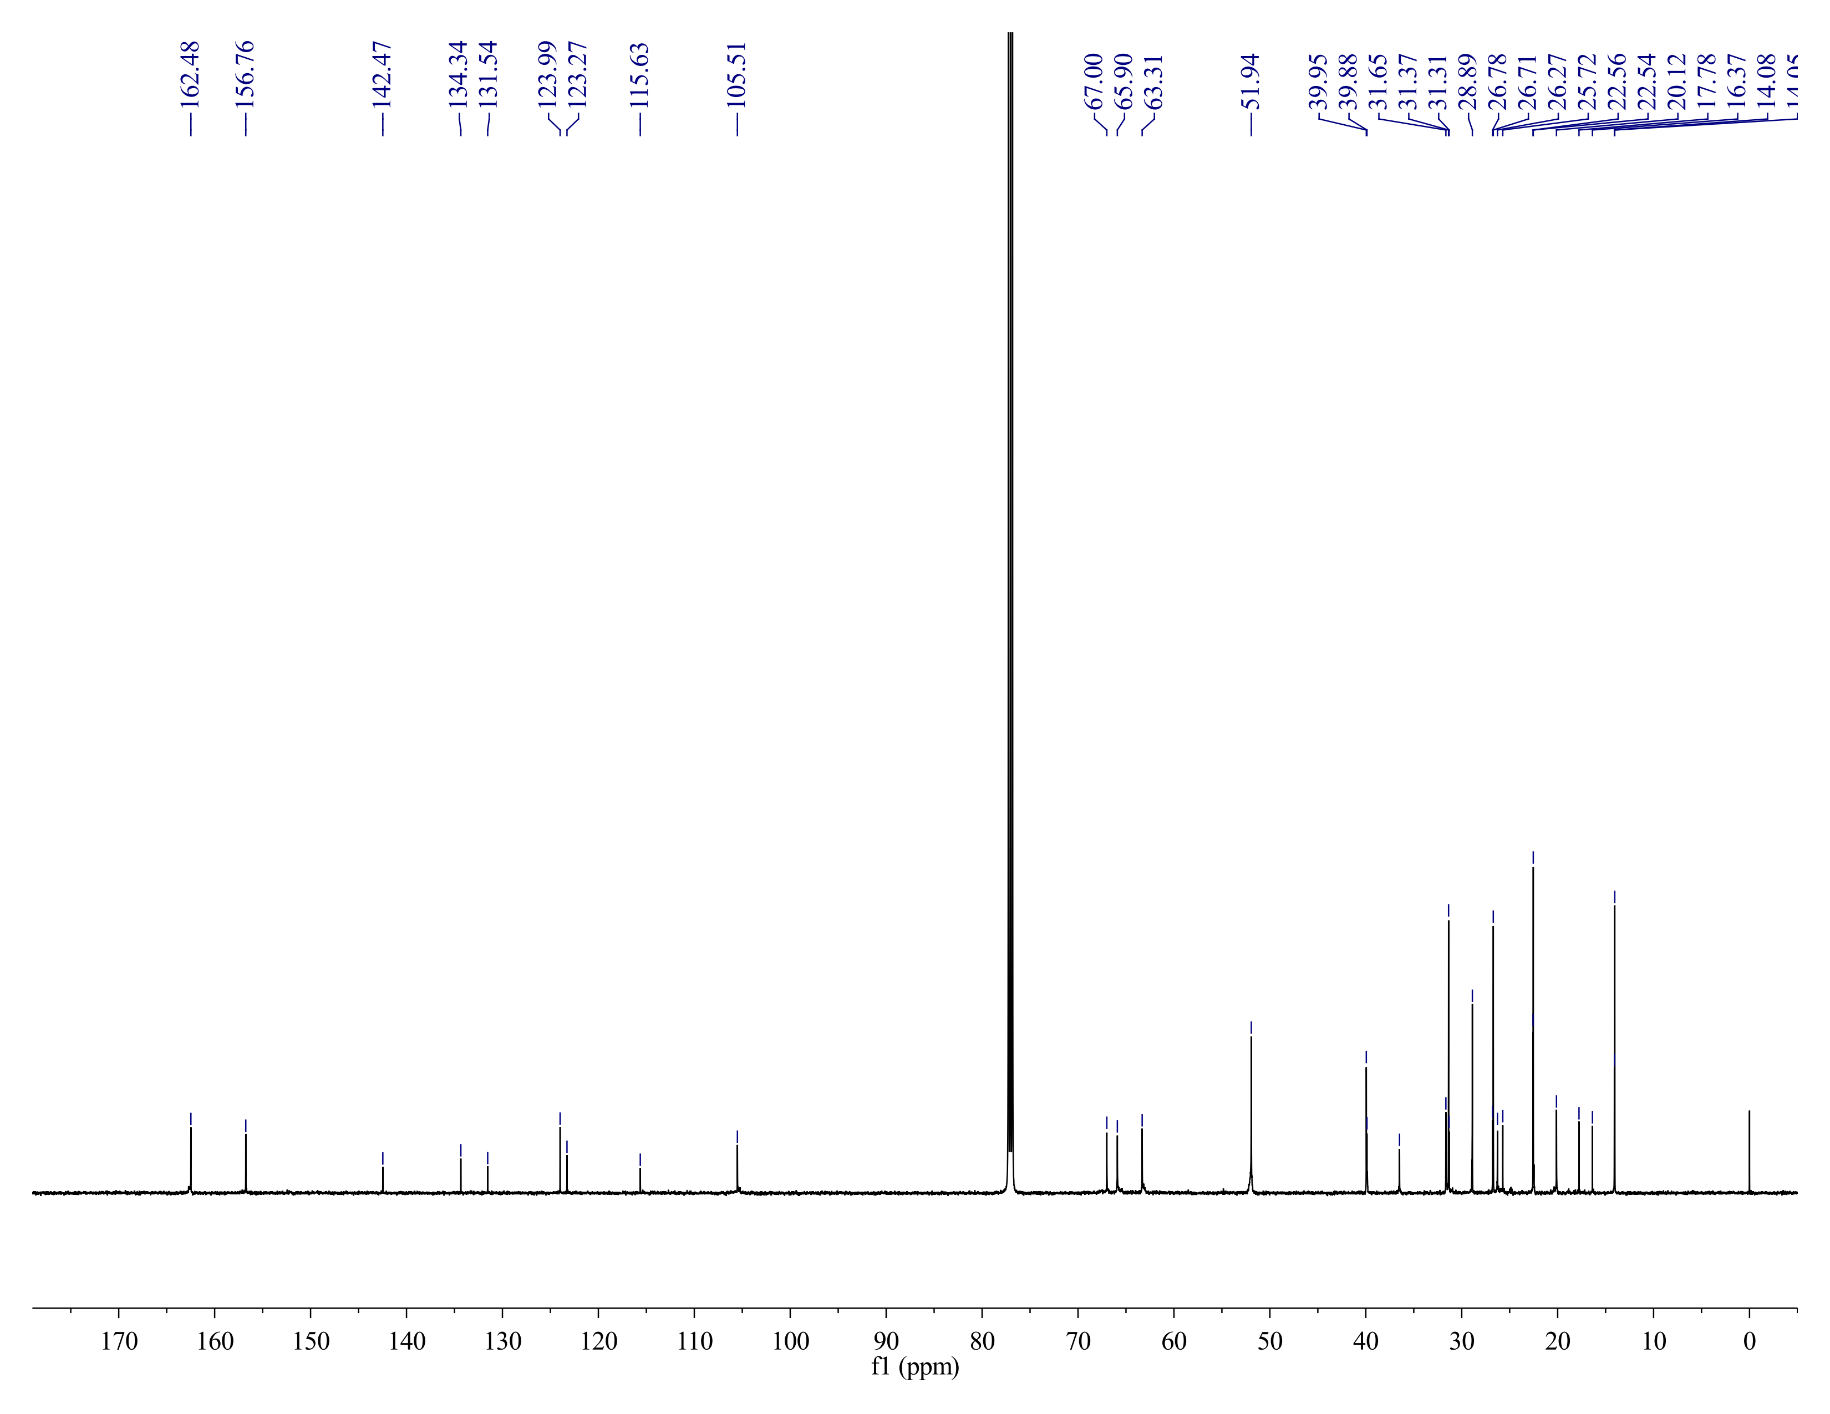
**

**Fig S41. 13C NMR spectrum of 5n**

**
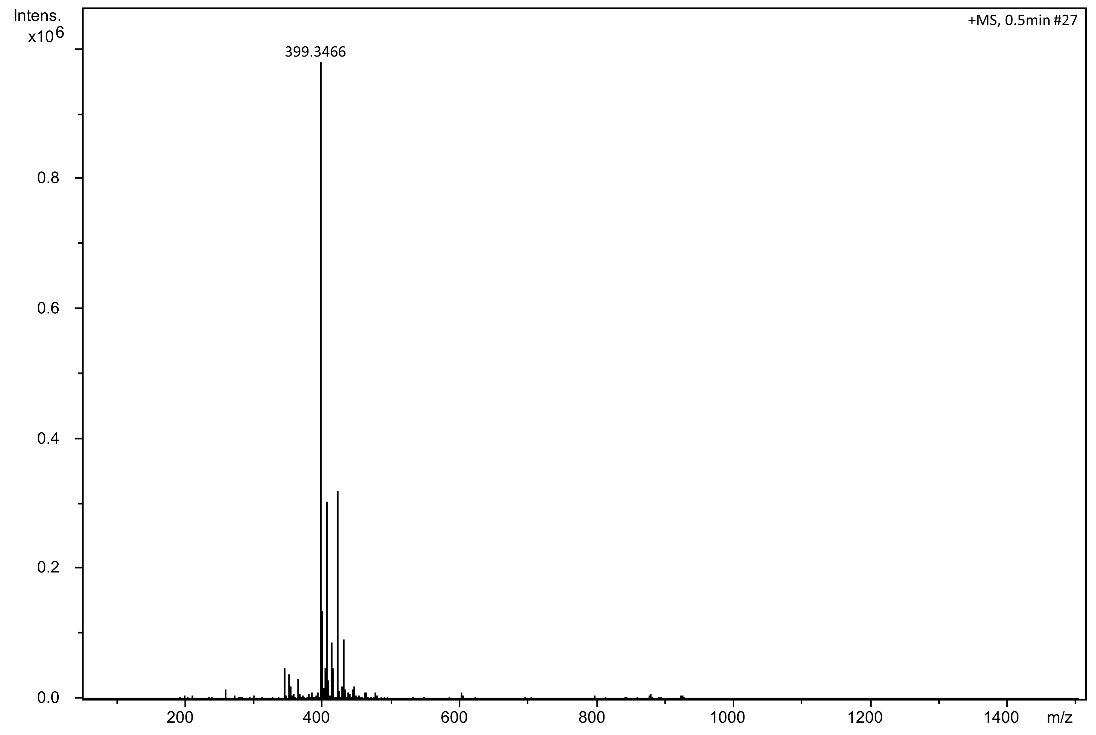
**

**Fig S42. HRMS spectrum of 5n**

**
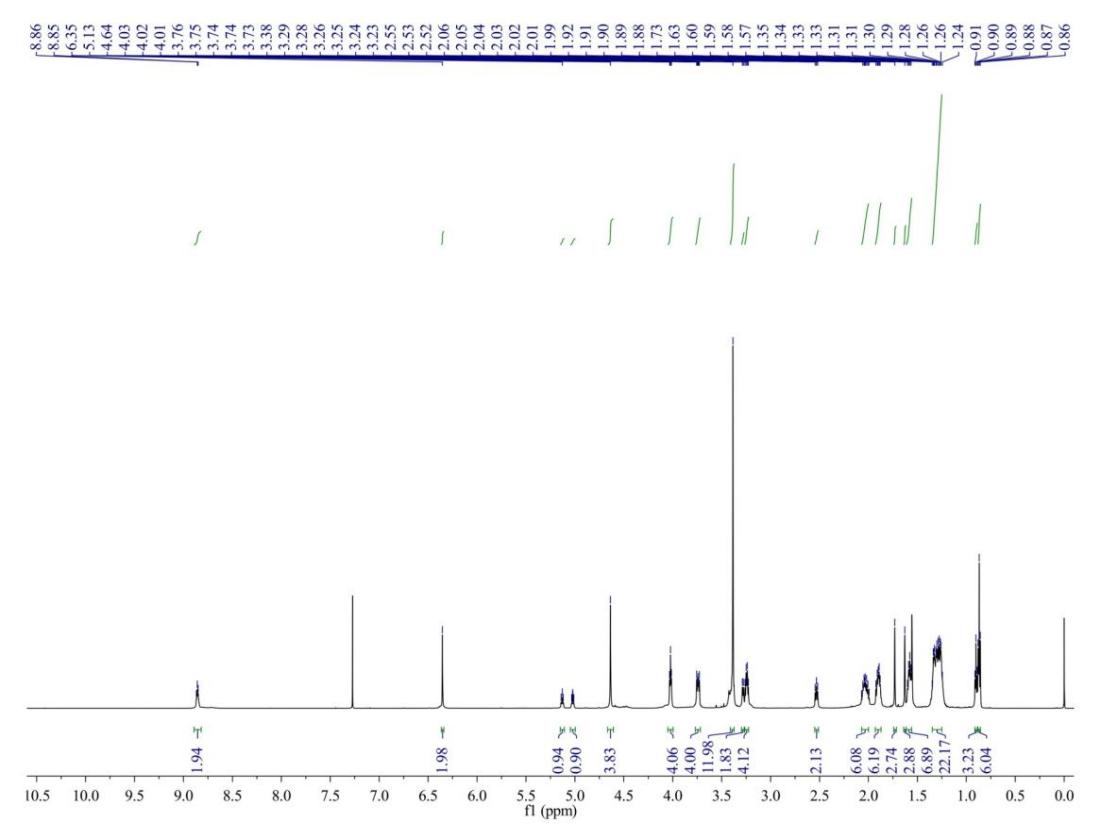
**

**Fig S43. 1H NMR spectrum of 5o**

**
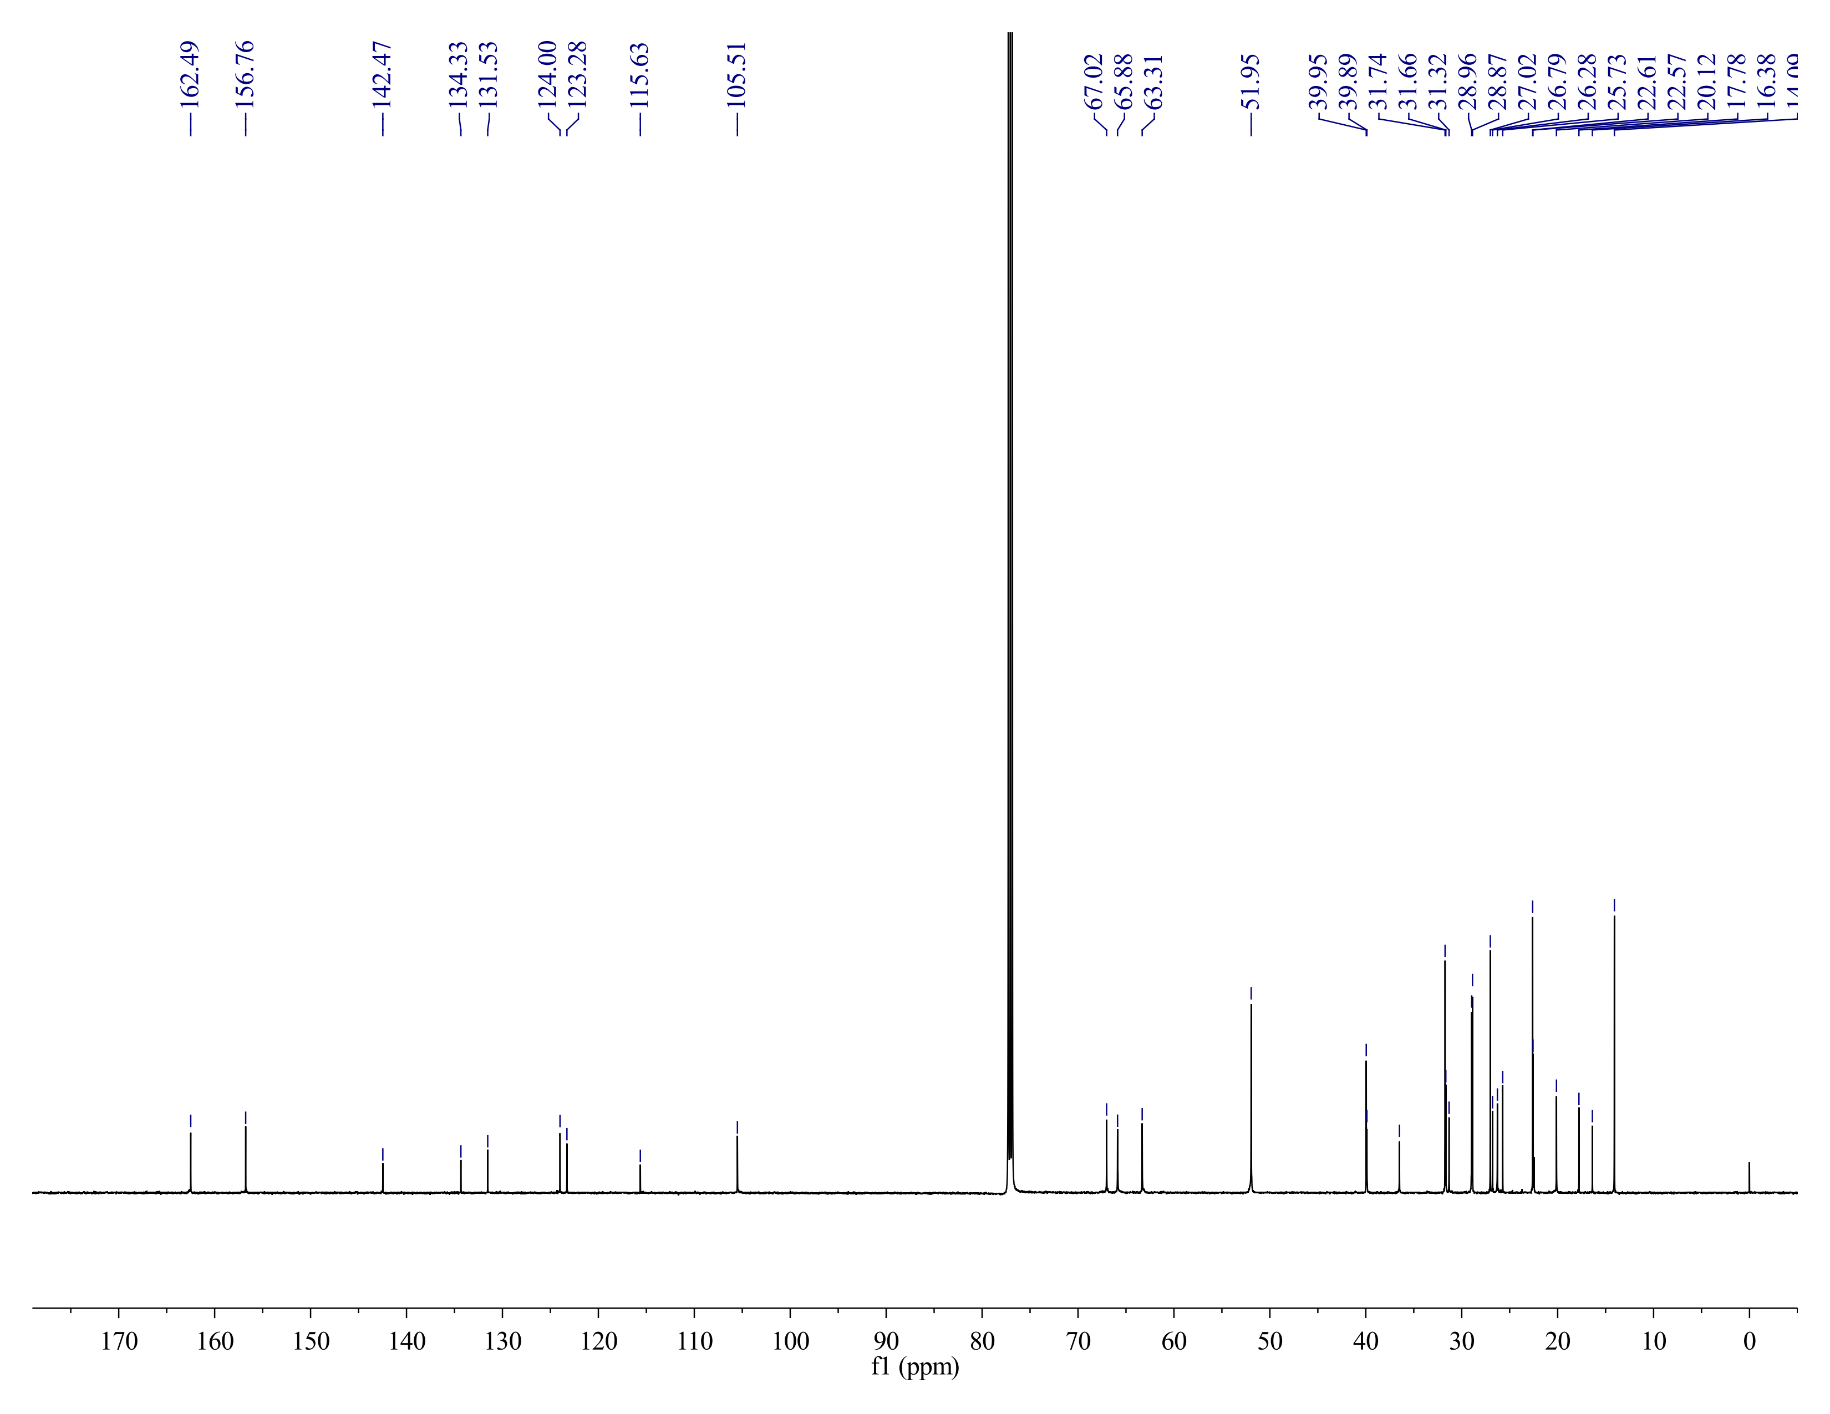
**

**Fig S44. 13C NMR spectrum of 5o**

**
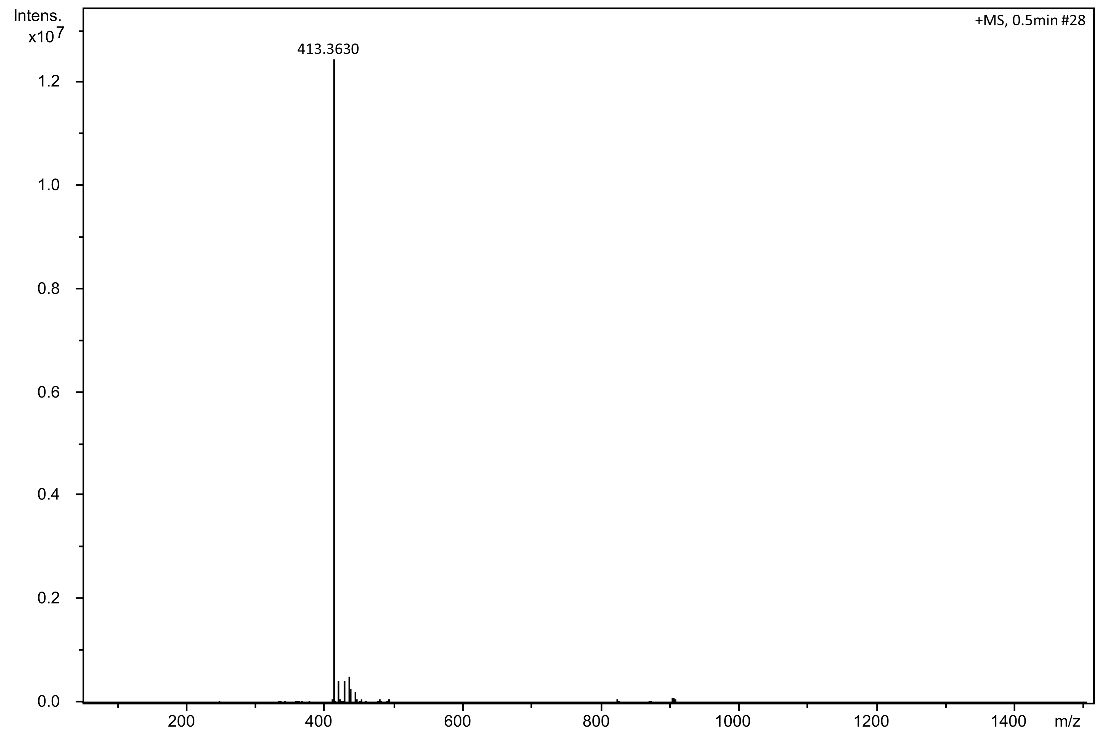
**

**Fig S45. HRMS spectrum of 5o**

**
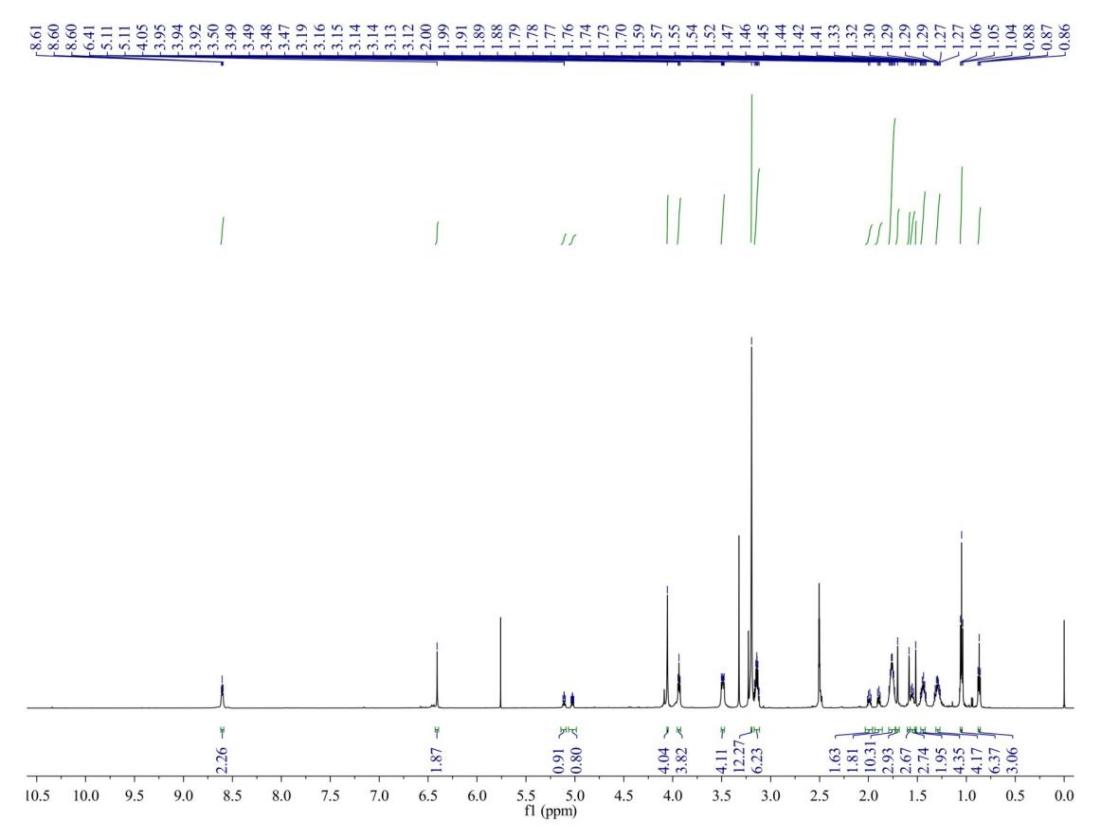
**

**Fig S46. 1H NMR spectrum of 5p**

**
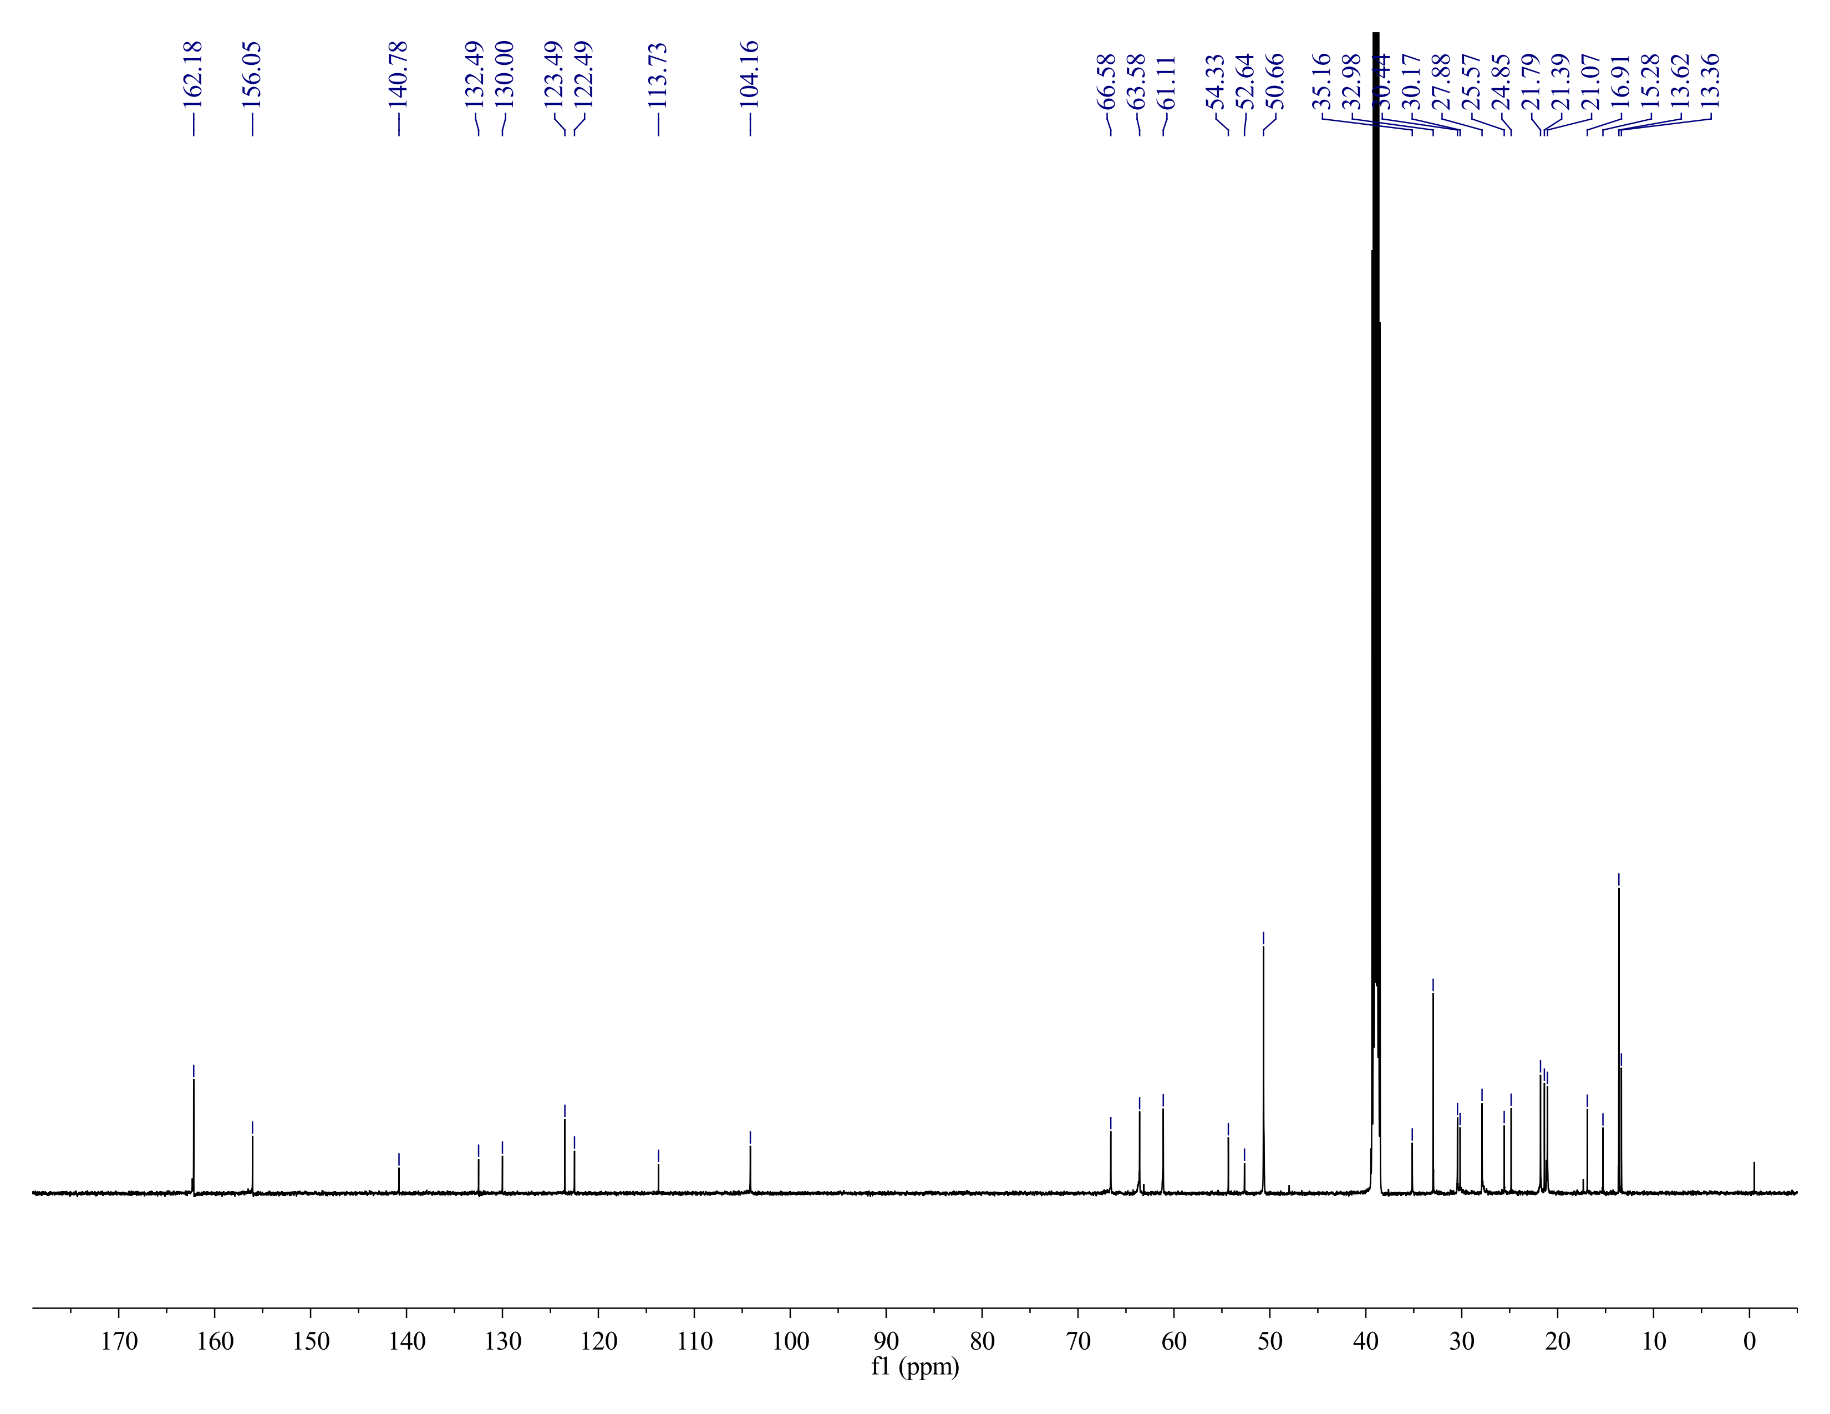
**

**Fig S47. 13C NMR spectrum of 5p**

**
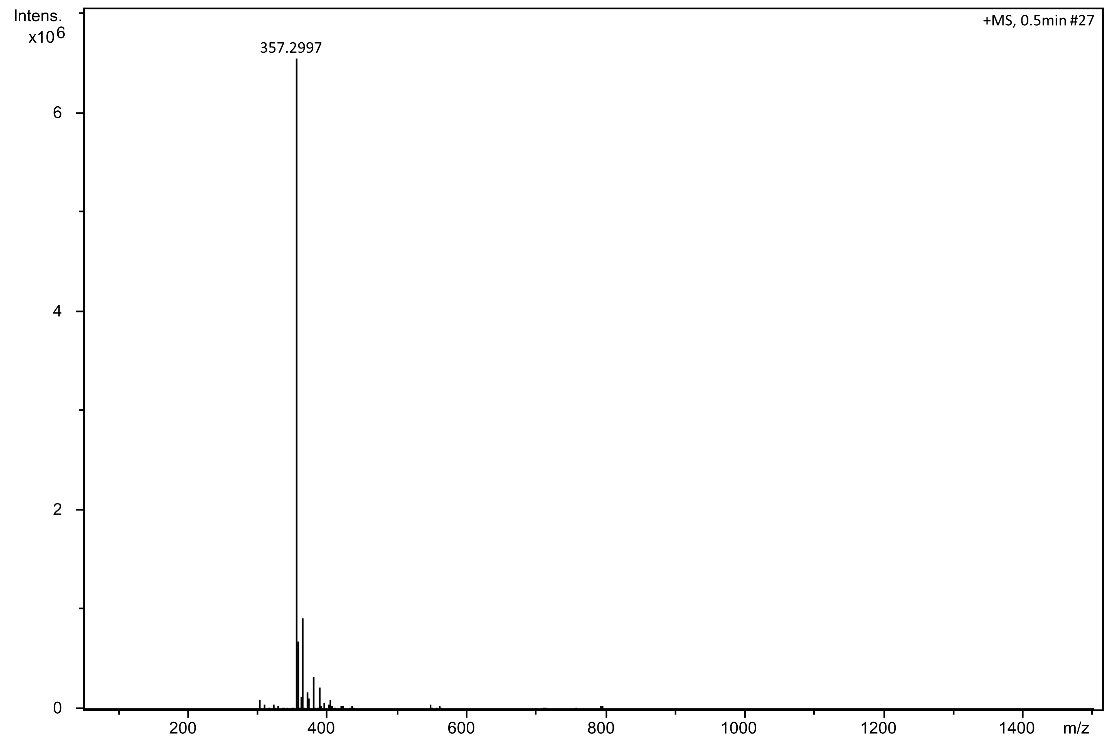
**

**Fig S48. HRMS spectrum of 5p**

**
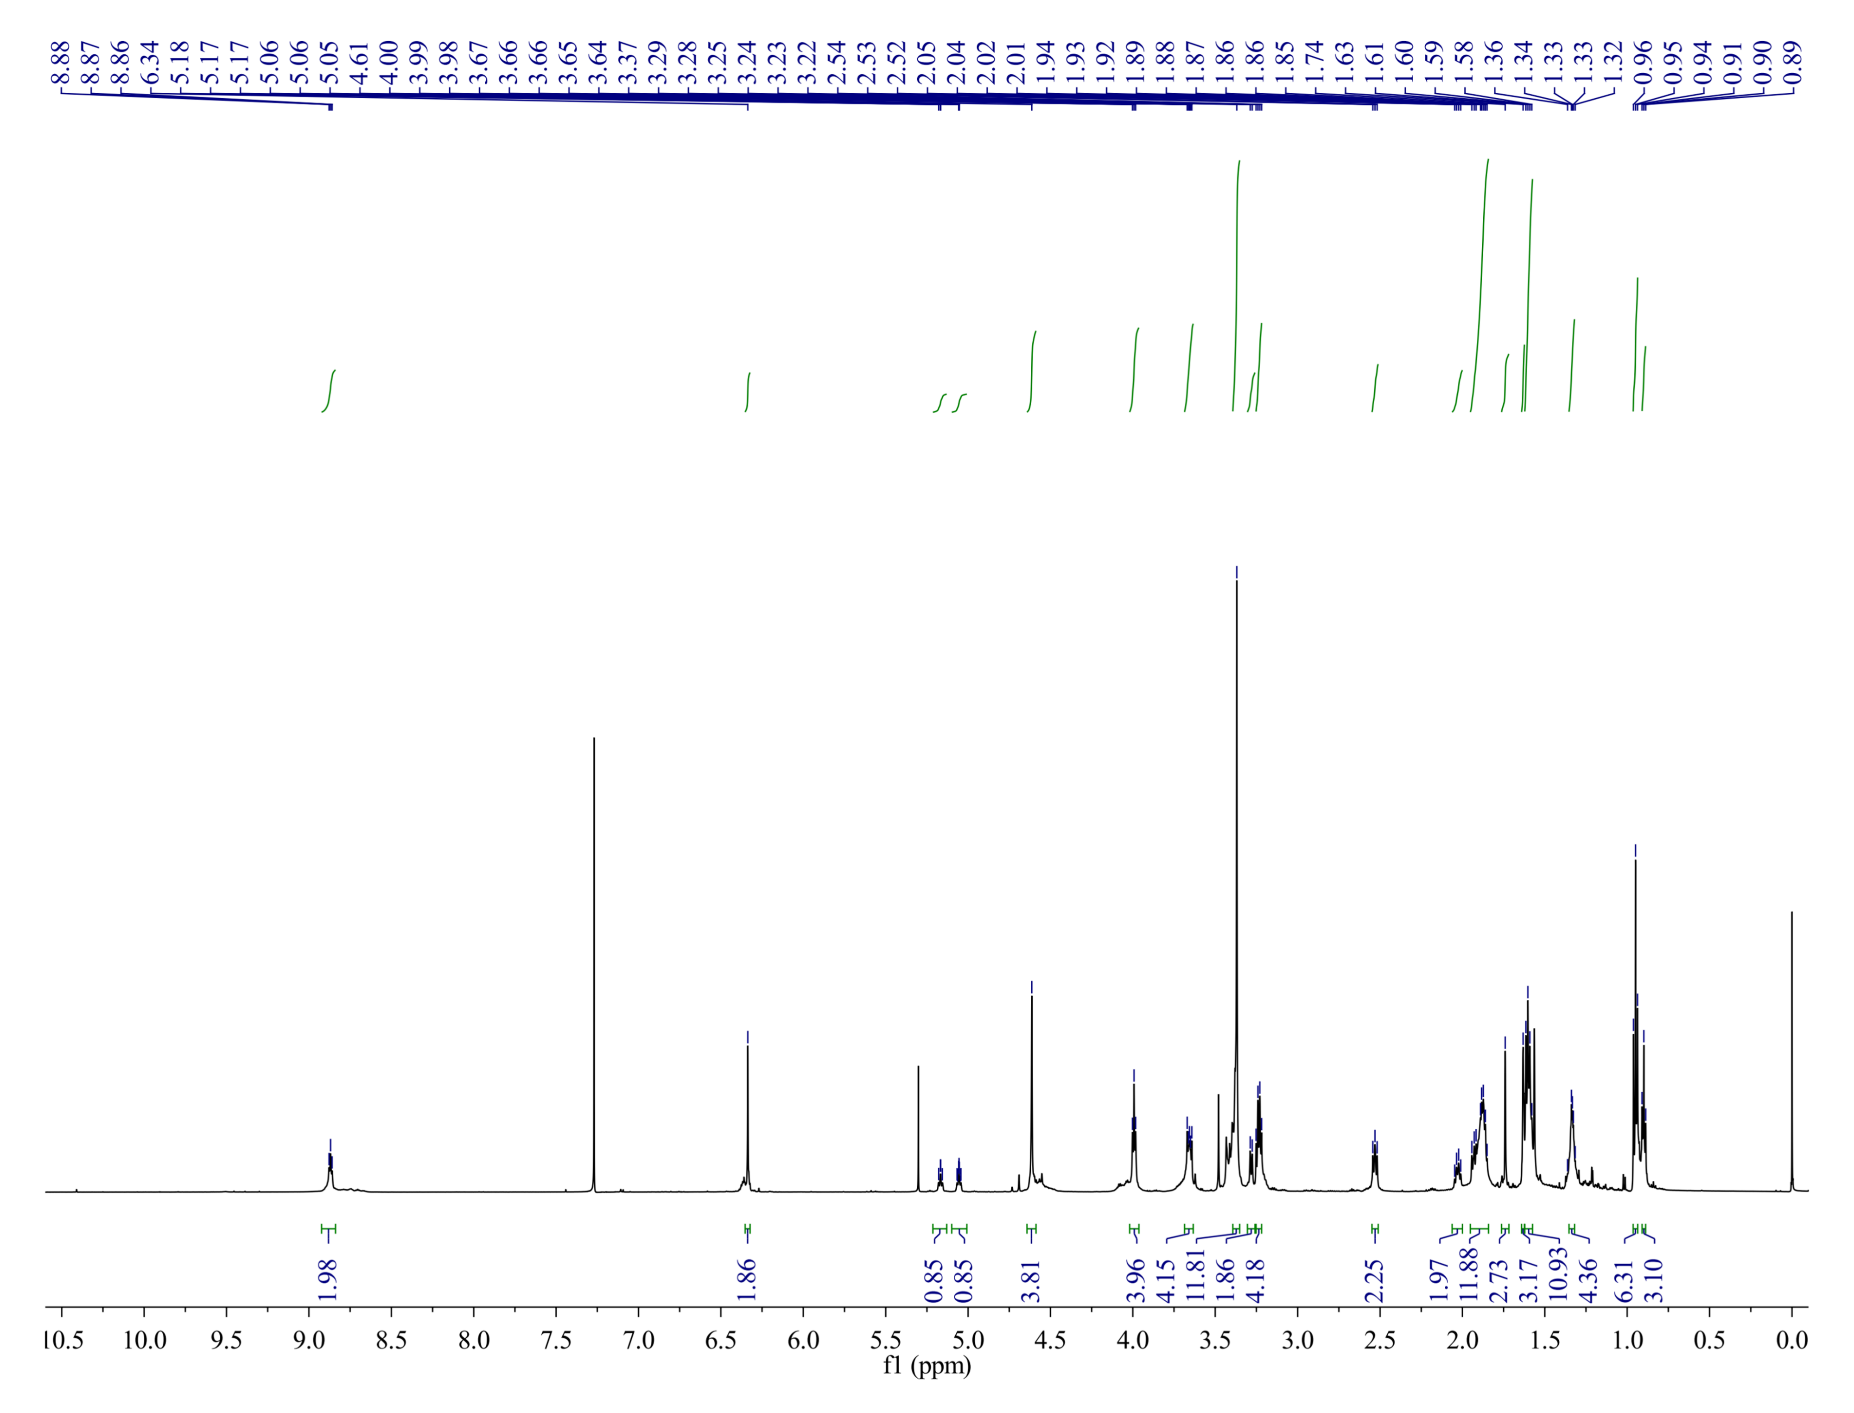
**

**Fig S49. 1H NMR spectrum of 5q**

**
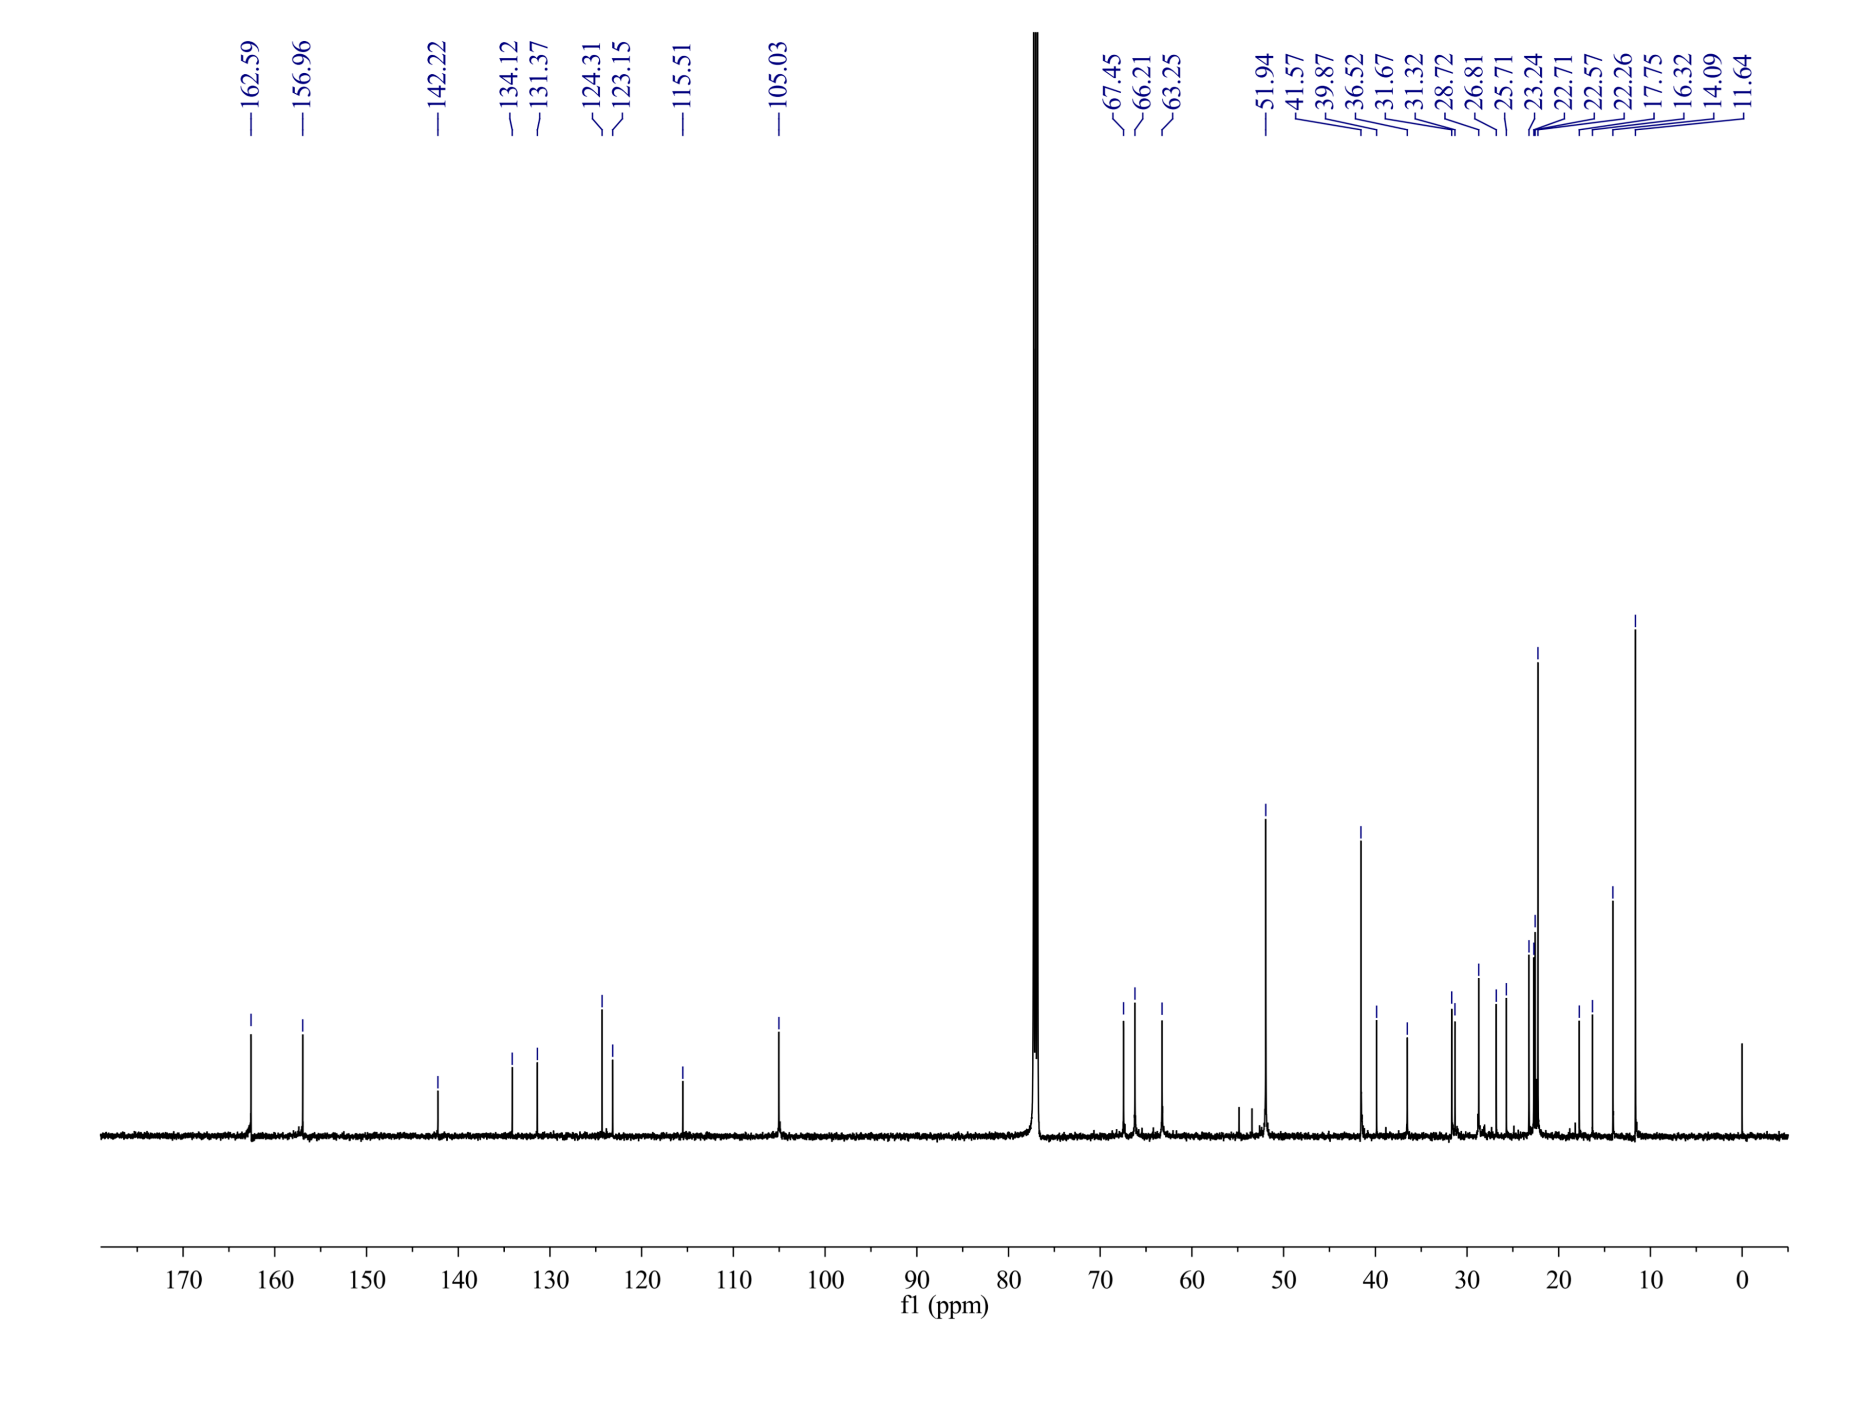
**

**Fig S50. 13C NMR spectrum of 5q**

**
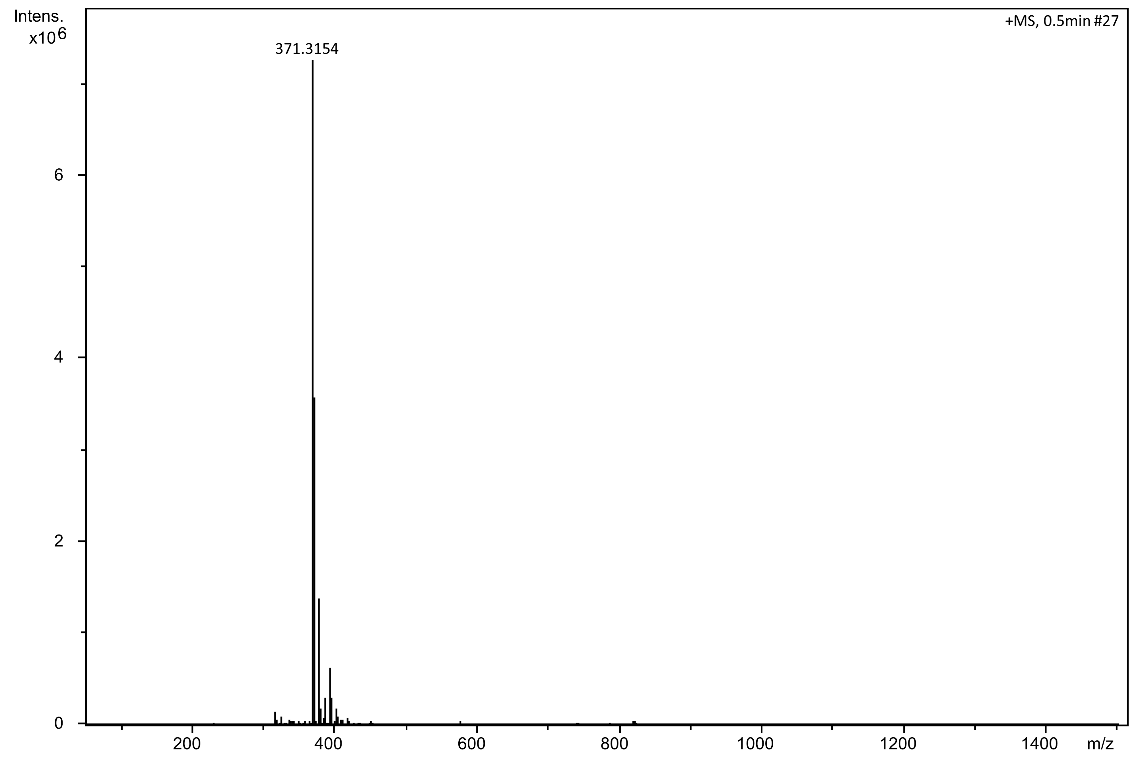
**

**Fig S51. HRMS spectrum of 5q**

**
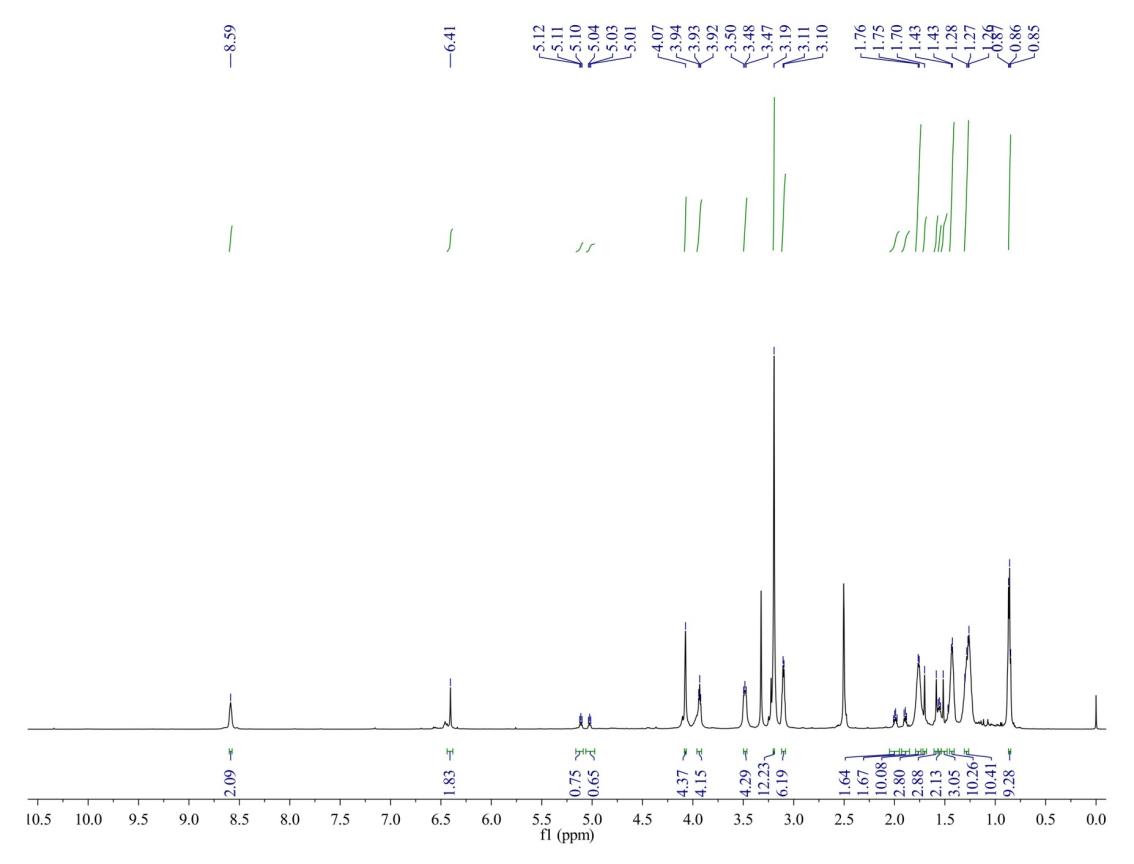
**

**Fig S52. 1H NMR spectrum of 5r**

**
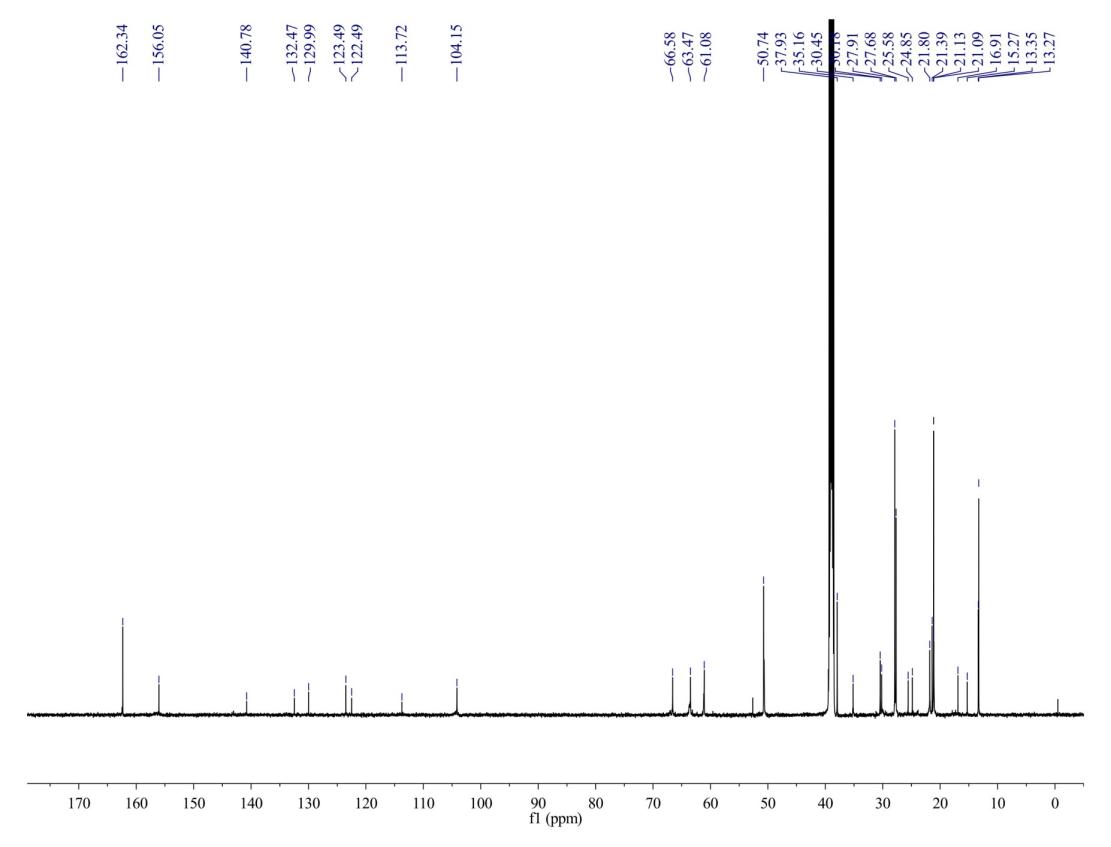
**

**Fig S53. 13C NMR spectrum of 5r**

**
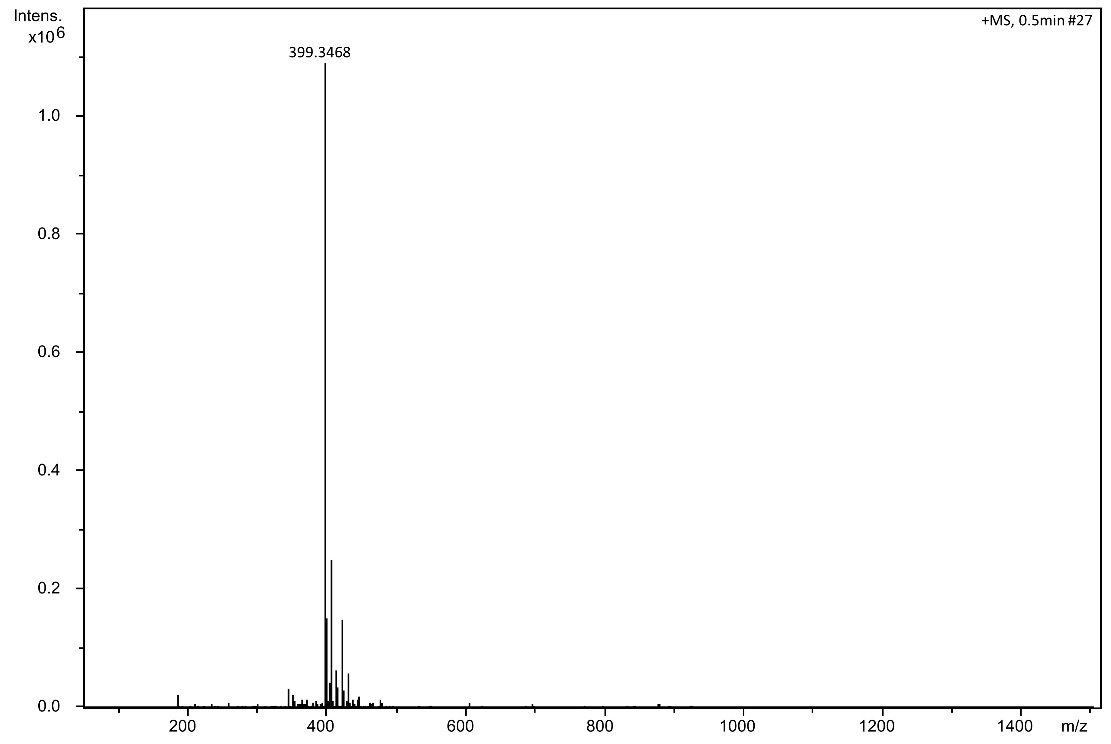
**

**Fig S54. HRMS spectrum of 5r**

**
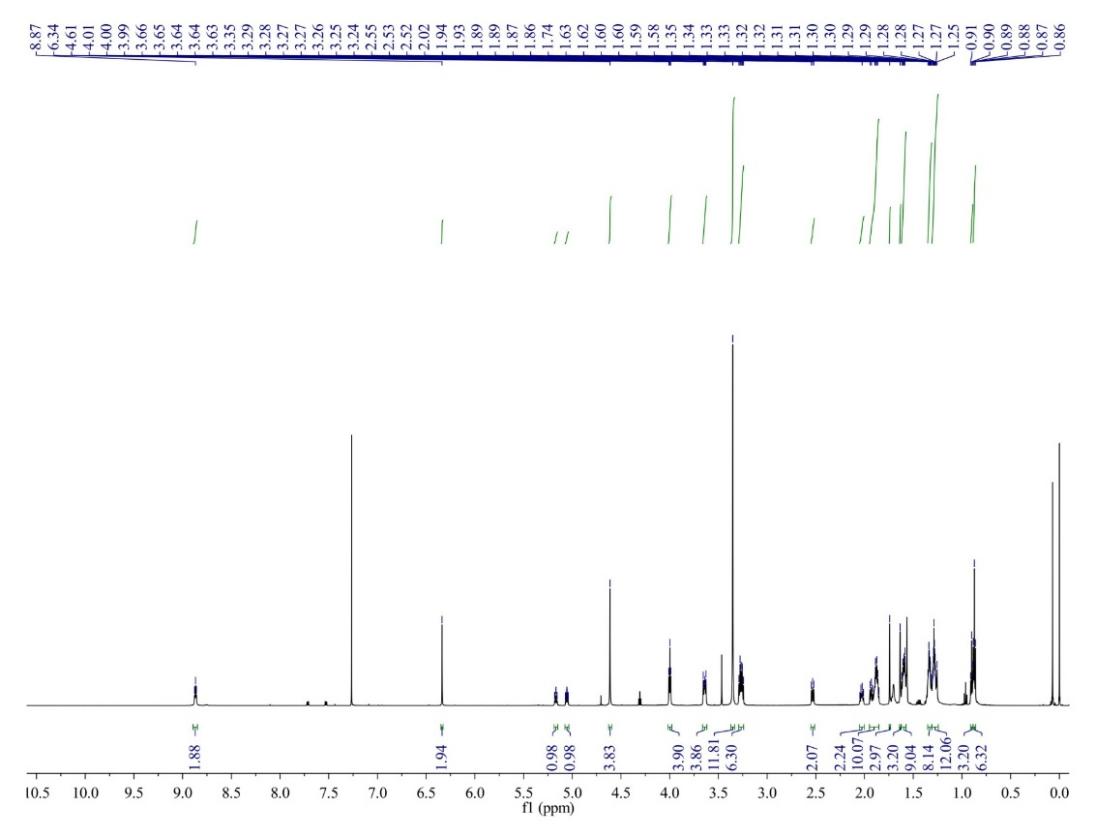
**

**Fig S55. 1H NMR spectrum of 5s**

**
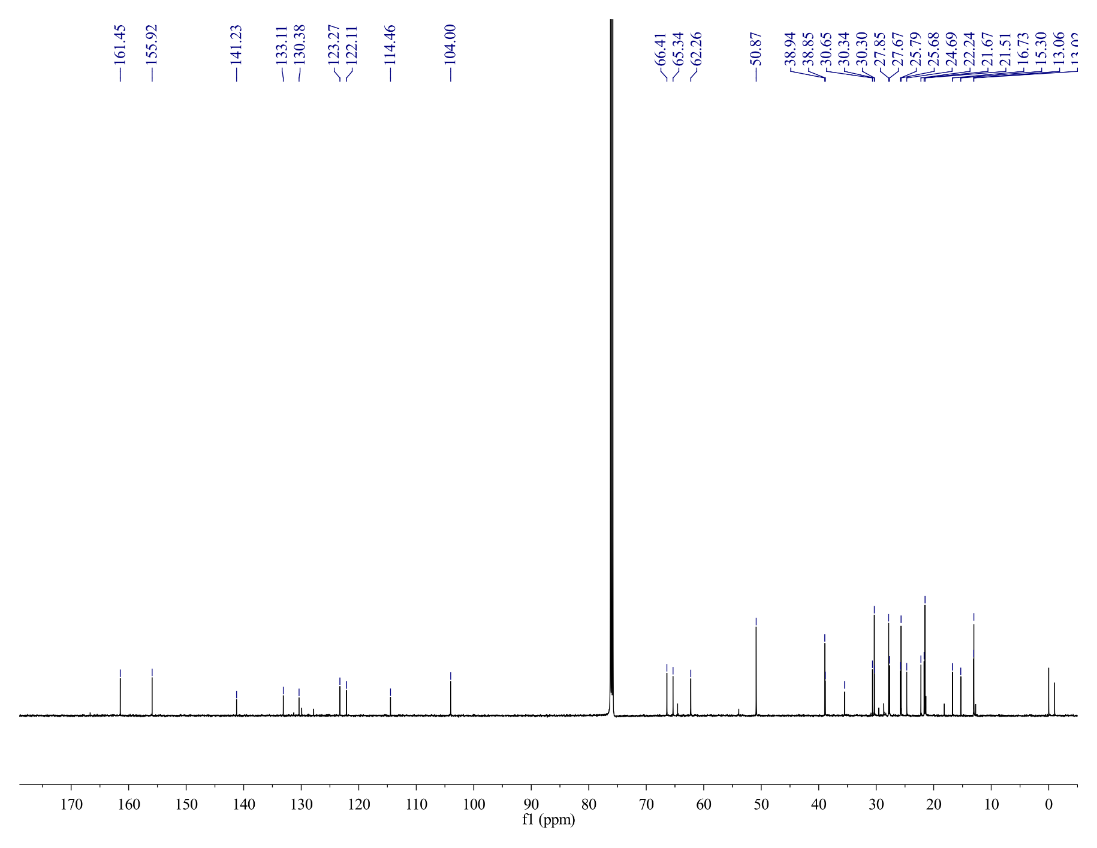
**

**Fig S56. 13C NMR spectrum of 5s**

**
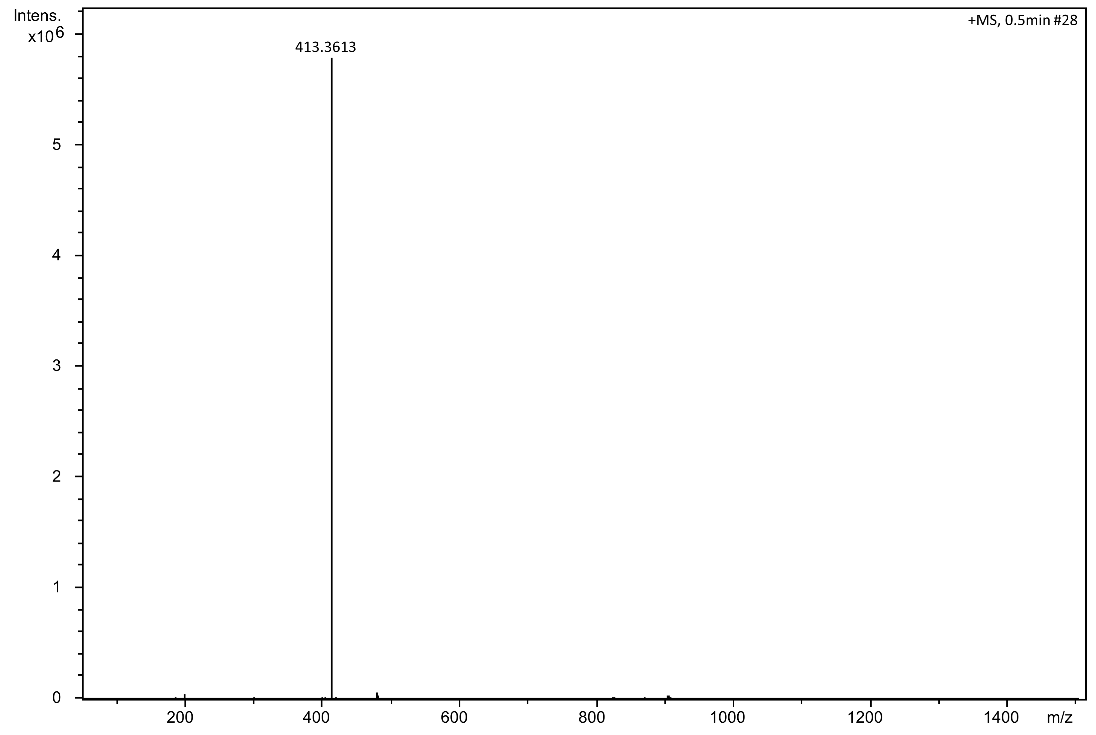
**

**Fig S57. HRMS spectrum of 5s**

**
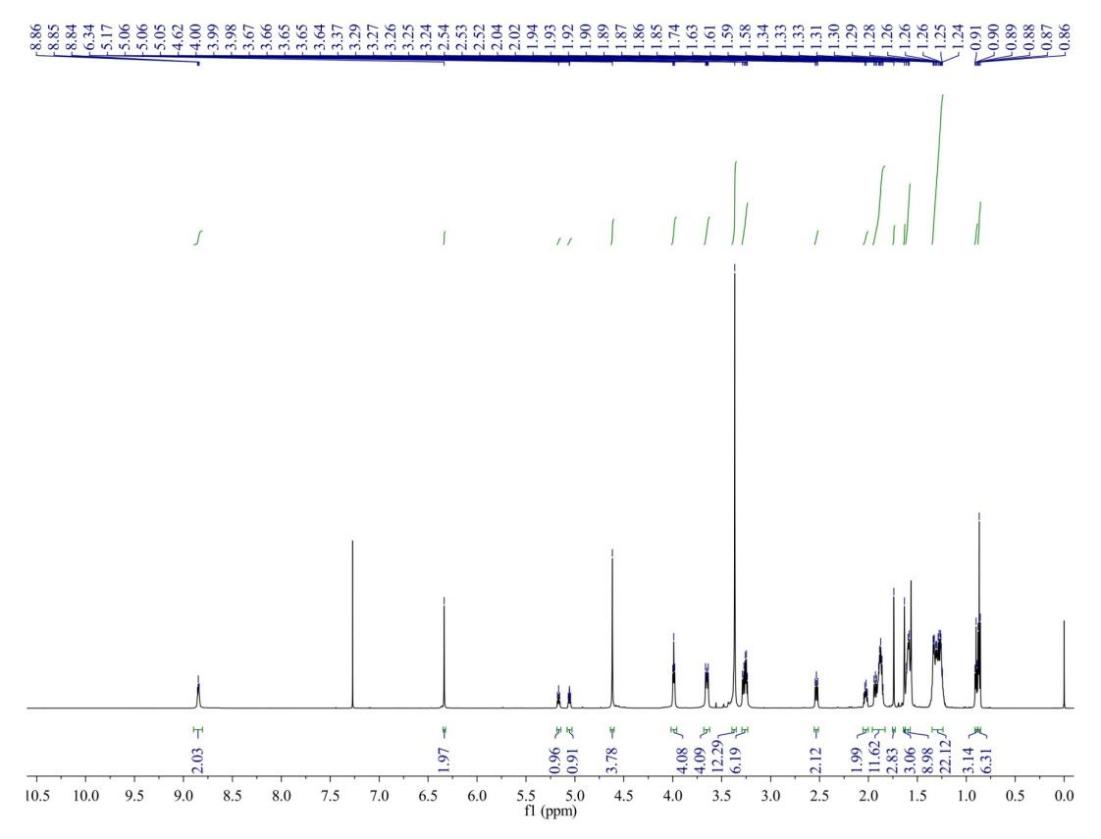
**

**Fig S58. 1H NMR spectrum of 5t**

**
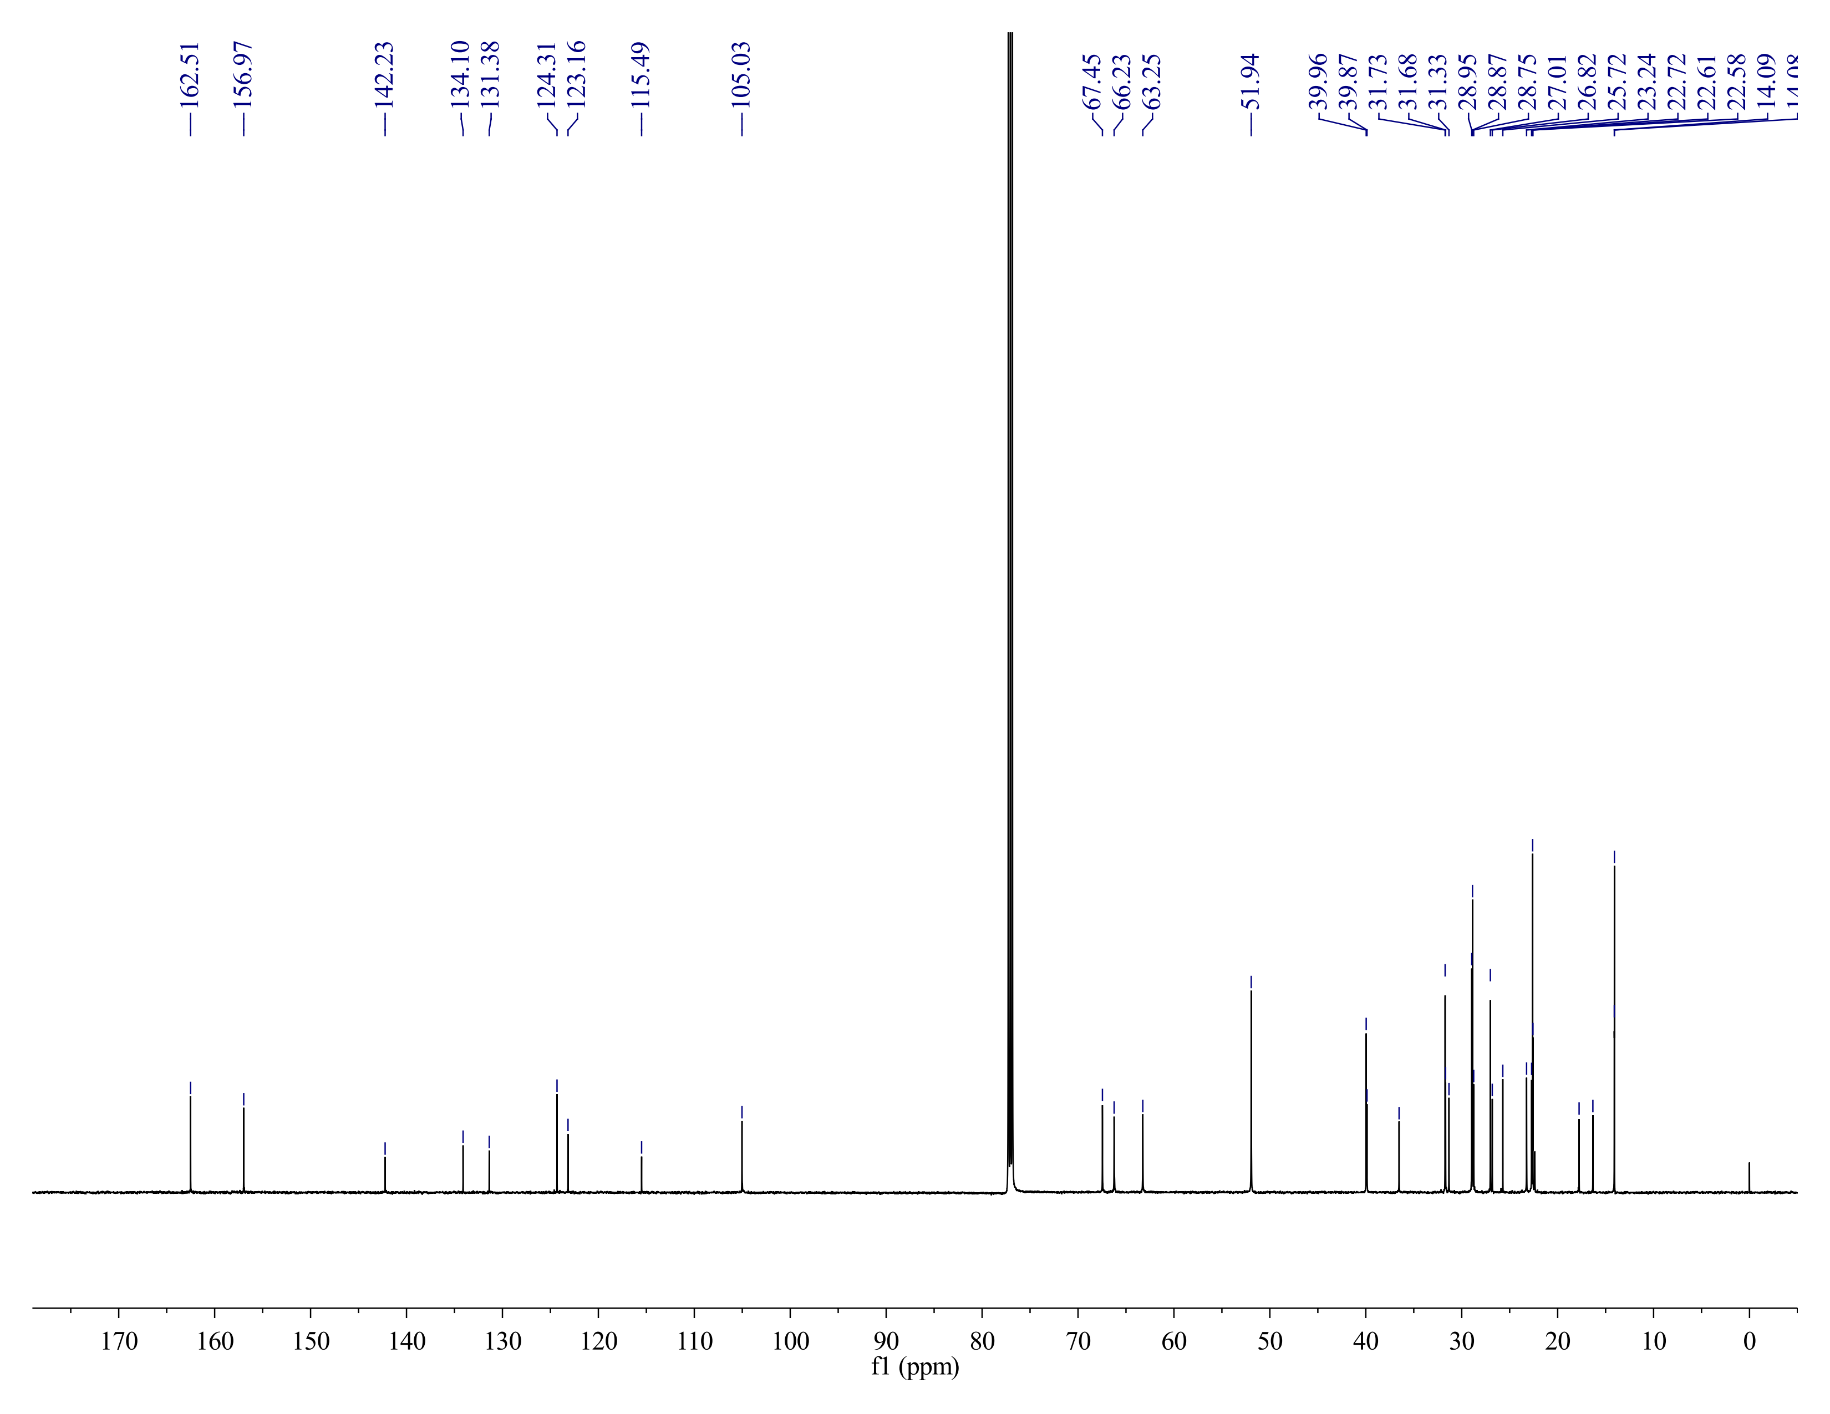
**

**Fig S59. 13C NMR spectrum of 5t**

**
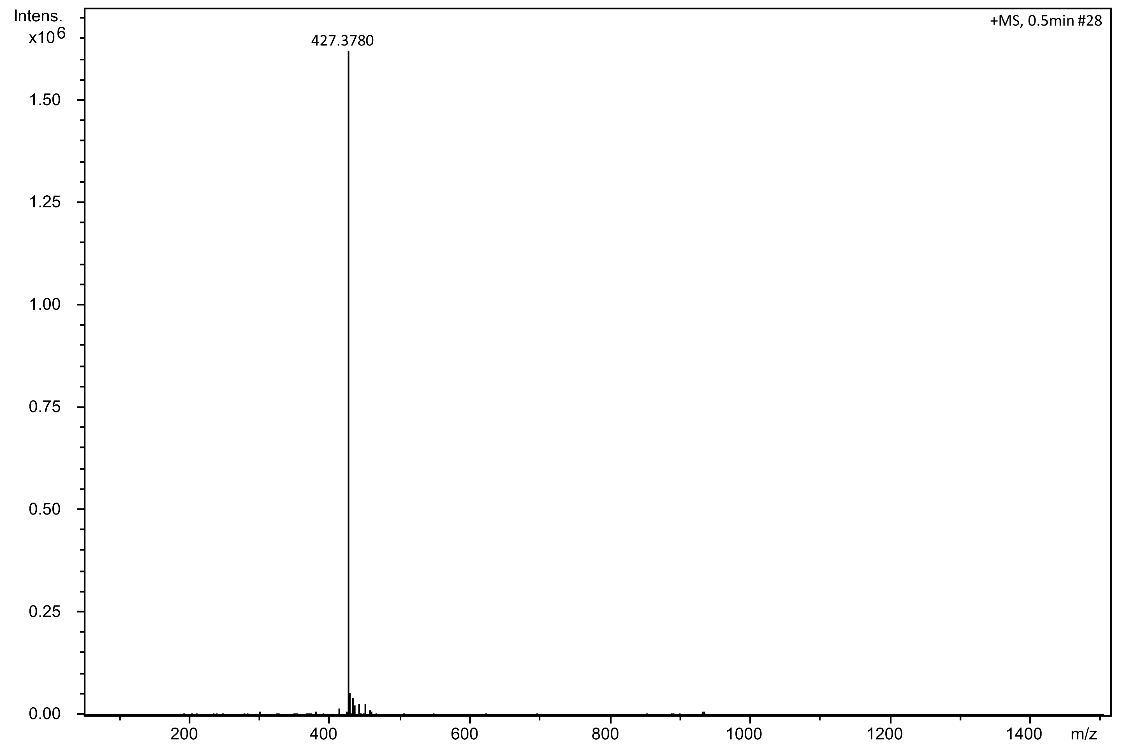
**

**Fig S60. HRMS spectrum of 5t**

**References**

1. Ingolfsson HI, Melo MN, van Eerden FJ, et al. Lipid organization of the plasma membrane. *J Am Chem Soc*. 2014;136(41):14554-9. doi:10.1021/ja507832e

2. Pogozheva ID, Armstrong GA, Kong L, et al. Comparative molecular dynamics simulation studies of realistic eukaryotic, prokaryotic, and archaeal membranes. *J Chem Inf Model*. 2022;62(4):1036-1051. doi:10.1021/acs.jcim.1c01514

3. Wu EL, Engstrom O, Jo S, et al. Molecular dynamics and NMR spectroscopy studies of *E. coli* lipopolysaccharide structure and dynamics. *Biophys J*. 2013;105(6):1444-55. doi:10.1016/j.bpj.2013.08.002

4. Wu EL, Fleming PJ, Yeom MS, et al. *E. coli* outer membrane and interactions with OmpLA. *Biophys J*. 2014;106(11):2493-502. doi:10.1016/j.bpj.2014.04.024

5. Bernat P, Paraszkiewicz K, Siewiera P, Moryl M, Plaza G, Chojniak J. Lipid composition in a strain of *Bacillus subtilis*, a producer of iturin A lipopeptides that are active against uropathogenic bacteria. *World J Microbiol Biotechnol*. 2016;32(10):157. doi:10.1007/s11274-016-2126-0

6. Lim JB, Klauda JB. Lipid chain branching at the iso- and anteiso-positions in complex chlamydia membranes: A molecular dynamics study. *Biochim Biophys Acta*. 2011;1808(1):323-31. doi:10.1016/j.bbamem.2010.07.036
